# Supplementary material for: Predicting instrumental mass fractionation (IMF) of stable isotope SIMS analyses by response surface methodology (RSM)
Source: Royal Society of Chemistry journal article supplement (doi:10.1039/c6ja00397d), 2017-01-01

This electronic supporting information *S4* contains the main steps for fitting a response surface model using Minitab 17 (Minitab Inc.).

This process was used in “Predicting instrumental mass fractionation (IMF) of stable isotope SIMS analyses by response surface methodology (RSM)” by Fàbrega et al.

1. Copy and paste the SIMS data and IMF calculations from your spreadsheet to Minitab 17.

|    | E     | F        | G        | H       | I       | J     | K          | L          | M         | N           | O         | P            | Q                  | R   | S |
|----|-------|----------|----------|---------|---------|-------|------------|------------|-----------|-------------|-----------|--------------|--------------------|-----|---|
|    | Y     | CP       | PI       | LTidefX | LTidefY | An    | 16O        | 18O        | 18O VSMOW | 18O SE VSMO | 18O /16O  | 18O /16O     | 18O /16O Fluorinat | IMF |   |
| 1  | 1791  | 8.28E-09 | 5.98E-09 | -24     | 4       | 52.77 | 3126592330 | 6215301.94 | 0.44      | 0.04        | 0.0019879 | 0.0020202390 | 0.98398442         |     |   |
| 2  | 2231  | 6.58E-09 | 5.98E-09 | -22     | 6       | 52.10 | 3106711861 | 6176311.25 | 0.53      | 0.06        | 0.0019881 | 0.0020202390 | 0.98406877         |     |   |
| 3  | 2004  | 8.77E-09 | 5.97E-09 | -23     | 4       | 51.51 | 3124916593 | 6213309.74 | 0.74      | 0.06        | 0.0019883 | 0.0020202390 | 0.98419652         |     |   |
| 4  | 454   | 9.43E-09 | 5.95E-09 | -28     | 1       | 51.76 | 3139019474 | 6244739.48 | 1.09      | 0.06        | 0.0019894 | 0.0020202390 | 0.98473309         |     |   |
| 5  | 230   | 9.40E-09 | 5.96E-09 | -29     | 1       | 52.69 | 3143286812 | 6258453.13 | 1.31      | 0.05        | 0.0019898 | 0.0020202390 | 0.98492722         |     |   |
| 6  | -149  | 9.32E-09 | 5.95E-09 | -29     | -1      | 52.30 | 3115855360 | 6199359.72 | 1.11      | 0.07        | 0.0019896 | 0.0020202390 | 0.98484253         |     |   |
| 7  | -41   | 9.48E-09 | 5.95E-09 | -28     | -1      | 52.69 | 3090874274 | 6147108.08 | 0.75      | 0.07        | 0.0019888 | 0.0020202390 | 0.98443435         |     |   |
| 8  | 842   | 9.78E-09 | 5.98E-09 | -30     | -2      | 51.74 | 3114720186 | 6192169.09 | 0.46      | 0.05        | 0.0019880 | 0.0020202390 | 0.98405873         |     |   |
| 9  | -1828 | 7.29E-09 | 6.02E-09 | -8      | -3      | 24.09 | 3276743595 | 6524719.61 | 2.27      | 0.06        | 0.0019912 | 0.0020216426 | 0.98495186         |     |   |
| 10 | -1709 | 7.12E-09 | 6.03E-09 | -4      | 0       | 23.12 | 3255122421 | 6479442.97 | 1.91      | 0.05        | 0.0019905 | 0.0020216426 | 0.98461389         |     |   |
| 11 | -1238 | 7.10E-09 | 6.02E-09 | -1      | 2       | 24.10 | 3307213612 | 6586852.52 | 2.46      | 0.05        | 0.0019917 | 0.0020216426 | 0.98517028         |     |   |
| 12 | -1341 | 6.87E-09 | 6.02E-09 | 1       | 2       | 22.93 | 3298855270 | 6570858.74 | 2.57      | 0.06        | 0.0019919 | 0.0020216426 | 0.98526823         |     |   |
| 13 | -1516 | 6.81E-09 | 6.02E-09 | 7       | -1      | 23.63 | 3299967522 | 6576966.56 | 3.03      | 0.05        | 0.0019930 | 0.0020216426 | 0.98585168         |     |   |

|    | C1-D       | C2-D        | C3-T             | C4   | C5    | C6       | C7       | C8      | C9      | C10   | C11        | C12        | C13       | C14         | C15       | C16                | C17        | C18 |
|----|------------|-------------|------------------|------|-------|----------|----------|---------|---------|-------|------------|------------|-----------|-------------|-----------|--------------------|------------|-----|
|    | Date       | Hour        | Pattern          | X    | Y     | CP       | PI       | LTidefX | LTidefY | An    | 16O        | 18O        | 18O VSMOW | 18O SE VSMO | 18O /16O  | 18O /16O Fluorinat | IMF        |     |
| 1  | 22/07/2014 | 9:52:00 AM  | Pattern_Andre001 | 6100 | 1791  | 8.28E-09 | 5.98E-09 | -24     | 4       | 52.77 | 3126592330 | 6215301.94 | 0.44      | 0.04        | 0.0019879 | 0.0020202390       | 0.98398442 |     |
| 2  | 22/07/2014 | 9:52:00 AM  | Pattern_Andre001 | 5980 | 2231  | 6.58E-09 | 5.98E-09 | -22     | 6       | 52.10 | 3106711861 | 6176311.25 | 0.53      | 0.06        | 0.0019881 | 0.0020202390       | 0.98406877 |     |
| 3  | 22/07/2014 | 9:52:00 AM  | Pattern_Andre002 | 5933 | 2004  | 8.77E-09 | 5.97E-09 | -23     | 4       | 51.51 | 3124916593 | 6213309.74 | 0.74      | 0.06        | 0.0019883 | 0.0020202390       | 0.98419652 |     |
| 4  | 22/07/2014 | 10:24:00 AM | Pattern_Andre04  | 6350 | 454   | 9.43E-09 | 5.95E-09 | -28     | 1       | 51.76 | 3139019474 | 6244739.48 | 1.09      | 0.06        | 0.0019894 | 0.0020202390       | 0.98473309 |     |
| 5  | 22/07/2014 | 10:28:00 AM | Pattern_Andre05  | 6455 | 230   | 9.40E-09 | 5.96E-09 | -29     | 1       | 52.69 | 3143286812 | 6258453.13 | 1.31      | 0.05        | 0.0019898 | 0.0020202390       | 0.98492722 |     |
| 6  | 22/07/2014 | 10:32:00 AM | Pattern_Andre06  | 6648 | -149  | 9.32E-09 | 5.95E-09 | -29     | -1      | 52.30 | 3115855360 | 6199359.72 | 1.11      | 0.07        | 0.0019896 | 0.0020202390       | 0.98484253 |     |
| 7  | 22/07/2014 | 10:36:00 AM | Pattern_Andre07  | 6821 | -41   | 9.48E-09 | 5.95E-09 | -28     | -1      | 52.69 | 3090874274 | 6147108.08 | 0.75      | 0.07        | 0.0019888 | 0.0020202390       | 0.98443435 |     |
| 8  | 22/07/2014 | 10:44:00 AM | Pattern_Andre08  | 7411 | 842   | 9.78E-09 | 5.98E-09 | -30     | -2      | 51.74 | 3114720186 | 6192169.09 | 0.46      | 0.05        | 0.0019880 | 0.0020202390       | 0.98405873 |     |
| 9  | 22/07/2014 | 11:18:00 AM | Pattern_OLIG01   | 2042 | -1828 | 7.29E-09 | 6.02E-09 | -8      | -3      | 24.09 | 3276743595 | 6524719.61 | 2.27      | 0.06        | 0.0019912 | 0.0020216426       | 0.98495186 |     |
| 10 | 22/07/2014 | 11:22:00 AM | Pattern_OLIG02   | 1938 | -1709 | 7.12E-09 | 6.03E-09 | -4      | 0       | 23.12 | 3255122421 | 6479442.97 | 1.91      | 0.05        | 0.0019905 | 0.0020216426       | 0.98461389 |     |
| 11 | 22/07/2014 | 11:26:00 AM | Pattern_OLIG03   | 1049 | -1238 | 7.10E-09 | 6.02E-09 | -1      | 2       | 24.10 | 3307213612 | 6586852.52 | 2.46      | 0.05        | 0.0019917 | 0.0020216426       | 0.98517028 |     |
| 12 | 22/07/2014 | 11:30:00 AM | Pattern_OLIG04   | 961  | -1341 | 6.87E-09 | 6.02E-09 | 1       | 2       | 22.93 | 3298855270 | 6570858.74 | 2.57      | 0.06        | 0.0019919 | 0.0020216426       | 0.98526823 |     |
| 13 | 22/07/2014 | 11:34:00 AM | Pattern_OLIG05   | 72   | -1516 | 6.81E-09 | 6.02E-09 | 7       | -1      | 23.63 | 3299967522 | 6576966.56 | 3.03      | 0.05        | 0.0019930 | 0.0020216426       | 0.98585168 |     |
| 14 | 22/07/2014 | 11:38:00 AM | Pattern_OLIG06   | 72   | -1382 | 6.81E-09 | 6.02E-09 | 5       | -2      | 24.51 | 3307213612 | 6586852.52 | 2.46      | 0.05        | 0.0019917 | 0.0020216426       | 0.98517028 |     |
| 15 | 22/07/2014 | 11:43:00 AM | Pattern_OLIG07   | 662  | -2132 | 6.68E-09 | 6.01E-09 | 4       | -11     | 24.14 | 3281525275 | 6540479.7  | 3.24      | 0.06        | 0.0019931 | 0.0020216426       | 0.98586103 |     |
| 16 | 22/07/2014 | 11:47:00 AM | Pattern_OLIG08   | 817  | -2010 | 6.74E-09 | 6.00E-09 | 5       | -8      | 24.02 | 3270180054 | 6516385.7  | 2.86      | 0.05        | 0.0019927 | 0.0020216426       | 0.98566565 |     |
| 17 | 22/07/2014 | 11:50:00 AM | Pattern_FK201    | 288  | -4033 | 7.12E-09 | 6.03E-09 | 34      | 33      | 8.01  | 3329107974 | 6645259.7  | 5.78      | 0.06        | 0.0019961 | 0.0020247173       | 0.98587070 |     |
| 18 | 22/07/2014 | 11:50:00 AM | Pattern_FK202    | 193  | -4011 | 7.10E-09 | 6.01E-09 | 34      | 27      | 8.40  | 3321546837 | 6648221.1  | 5.45      | 0.06        | 0.0019955 | 0.0020247173       | 0.98585707 |     |
| 19 | 22/07/2014 | 12:30:00 PM | Pattern_FK203    | 387  | -4030 | 7.00E-09 | 6.02E-09 | 34      | 26      | 7.89  | 3320375448 | 6628482.2  | 5.74      | 0.05        | 0.0019963 | 0.0020247173       | 0.98595964 |     |
| 20 | 22/07/2014 | 12:37:00 PM | Pattern_FK204    | 1682 | -3531 | 6.87E-09 | 6.02E-09 | 28      | 48      | 8.62  | 3350082413 | 6690198.7  | 6.22      | 0.05        | 0.0019970 | 0.0020247173       | 0.98633132 |     |

2. Go to Stat, DOE (Design of Experiments), Create a Response Surface Design.

|    | C1-D       | C2-T     | C3               | C4   | C5    | C6       | C7       | C8      | C9      | C10   | C11        | C12        | C13       | C14         | C15       | C16                |
|----|------------|----------|------------------|------|-------|----------|----------|---------|---------|-------|------------|------------|-----------|-------------|-----------|--------------------|
|    | Date       | Hour     | Pattern          | X    | Y     | CP       | PI       | LTidefX | LTidefY | An    | 16O        | 18O        | 18O VSMOW | 18O SE VSMO | 18O /16O  | 18O /16O Fluorinat |
| 1  | 22/07/2014 | 9:52:00  | Pattern_Andre001 | 6100 | 1791  | 8.28E-09 | 5.98E-09 | -24     | 4       | 52.77 | 3126592330 | 6215301.94 | 0.44      | 0.04        | 0.0019879 | 0.0020202390       |
| 2  | 22/07/2014 | 9:52:00  | Pattern_Andre001 | 5980 | 2231  | 6.58E-09 | 5.98E-09 | -22     | 6       | 52.10 | 3106711861 | 6176311.25 | 0.53      | 0.06        | 0.0019881 | 0.0020202390       |
| 3  | 22/07/2014 | 9:52:00  | Pattern_Andre002 | 5933 | 2004  | 8.77E-09 | 5.97E-09 | -23     | 4       | 51.51 | 3124916593 | 6213309.74 | 0.74      | 0.06        | 0.0019883 | 0.0020202390       |
| 4  | 22/07/2014 | 10:24:00 | Pattern_Andre04  | 6350 | 454   | 9.43E-09 | 5.95E-09 | -28     | 1       | 51.76 | 3139019474 | 6244739.48 | 1.09      | 0.06        | 0.0019894 | 0.0020202390       |
| 5  | 22/07/2014 | 10:28:00 | Pattern_Andre05  | 6455 | 230   | 9.40E-09 | 5.96E-09 | -29     | 1       | 52.69 | 3143286812 | 6258453.13 | 1.31      | 0.05        | 0.0019898 | 0.0020202390       |
| 6  | 22/07/2014 | 10:32:00 | Pattern_Andre06  | 6648 | -149  | 9.32E-09 | 5.95E-09 | -29     | -1      | 52.30 | 3115855360 | 6199359.72 | 1.11      | 0.07        | 0.0019896 | 0.0020202390       |
| 7  | 22/07/2014 | 10:36:00 | Pattern_Andre07  | 6821 | -41   | 9.48E-09 | 5.95E-09 | -28     | -1      | 52.69 | 3090874274 | 6147108.08 | 0.75      | 0.07        | 0.0019888 | 0.0020202390       |
| 8  | 22/07/2014 | 10:44:00 | Pattern_Andre08  | 7411 | 842   | 9.78E-09 | 5.98E-09 | -30     | -2      | 51.74 | 3114720186 | 6192169.09 | 0.46      | 0.05        | 0.0019880 | 0.0020202390       |
| 9  | 22/07/2014 | 11:18:00 | Pattern_OLIG01   | 2042 | -1828 | 7.29E-09 | 6.02E-09 | -8      | -3      | 24.09 | 3276743595 | 6524719.61 | 2.27      | 0.06        | 0.0019912 | 0.0020216426       |
| 10 | 22/07/2014 | 11:22:00 | Pattern_OLIG02   | 1938 | -1709 | 7.12E-09 | 6.03E-09 | -4      | 0       | 23.12 | 3255122421 | 6479442.97 | 1.91      | 0.05        | 0.0019905 | 0.0020216426       |
| 11 | 22/07/2014 | 11:26:00 | Pattern_OLIG03   | 1049 | -1238 | 7.10E-09 | 6.02E-09 | -1      | 2       | 24.10 | 3307213612 | 6586852.52 | 2.46      | 0.05        | 0.0019917 | 0.0020216426       |
| 12 | 22/07/2014 | 11:30:00 | Pattern_OLIG04   | 961  | -1341 | 6.87E-09 | 6.02E-09 | 1       | 2       | 22.93 | 3298855270 | 6570858.74 | 2.57      | 0.06        | 0.0019919 | 0.0020216426       |
| 13 | 22/07/2014 | 11:34:00 | Pattern_OLIG05   | 72   | -1516 | 6.81E-09 | 6.02E-09 | 7       | -1      | 23.63 | 3299967522 | 6576966.56 | 3.03      | 0.05        | 0.0019930 | 0.0020216426       |
| 14 | 22/07/2014 | 11:38:00 | Pattern_OLIG06   | 72   | -1382 | 6.81E-09 | 6.02E-09 | 5       | -2      | 24.51 | 3307213612 | 6586852.52 | 2.46      | 0.05        | 0.0019917 | 0.0020216426       |
| 15 | 22/07/2014 | 11:43:00 | Pattern_OLIG07   | 662  | -2132 | 6.68E-09 | 6.01E-09 | 4       | -11     | 24.14 | 3281525275 | 6540479.7  | 3.24      | 0.06        | 0.0019931 | 0.0020216426       |
| 16 | 22/07/2014 | 11:47:00 | Pattern_OLIG08   | 817  | -2010 | 6.74E-09 | 6.00E-09 | 5       | -8      | 24.02 | 3270180054 | 6516385.7  | 2.86      | 0.05        | 0.0019927 | 0.0020216426       |
| 17 | 22/07/2014 | 11:50:00 | Pattern_FK201    | 288  | -4033 | 7.12E-09 | 6.03E-09 | 34      | 33      | 8.01  | 3329107974 | 6645259.7  | 5.78      | 0.06        | 0.0019961 | 0.0020247173       |
| 18 | 22/07/2014 | 11:50:00 | Pattern_FK202    | 193  | -4011 | 7.10E-09 | 6.01E-09 | 34      | 27      | 8.40  | 3321546837 | 6648221.1  | 5.45      | 0.06        | 0.0019955 | 0.0020247173       |
| 19 | 22/07/2014 | 12:30:00 | Pattern_FK203    | 387  | -4030 | 7.00E-09 | 6.02E-09 | 34      | 26      | 7.89  | 3320375448 | 6628482.2  | 5.74      | 0.05        | 0.0019963 | 0.0020247173       |
| 20 | 22/07/2014 | 12:37:00 | Pattern_FK204    | 1682 | -3531 | 6.87E-09 | 6.02E-09 | 28      | 48      | 8.62  | 3350082413 | 6690198.7  | 6.22      | 0.05        | 0.0019970 | 0.0020247173       |

3. If desired, a Response Surface Design toolbar can be created in *Tools*.

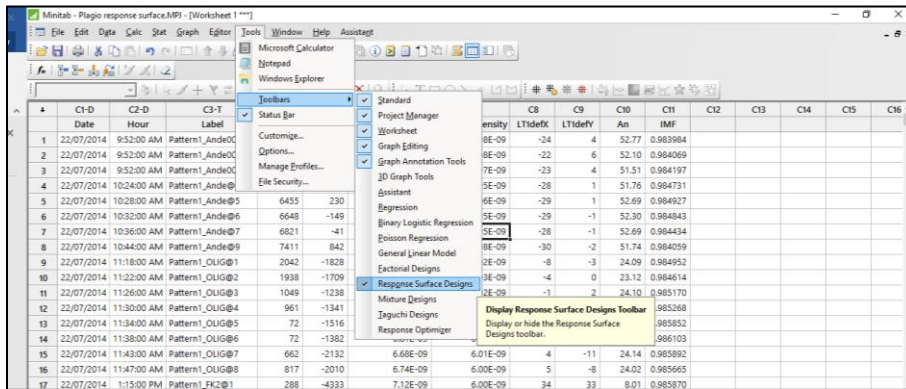

4. Select *Create Response Surface Design*.

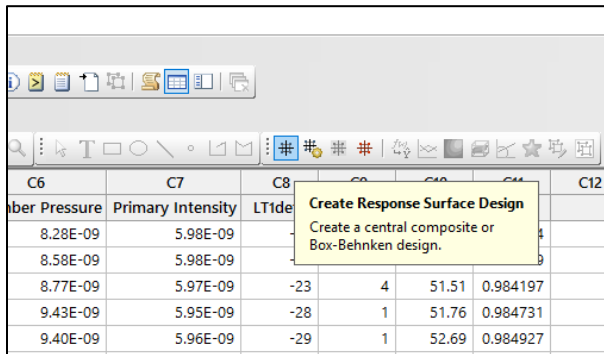

5. Introduce the number of continuous factors (predictor variables).

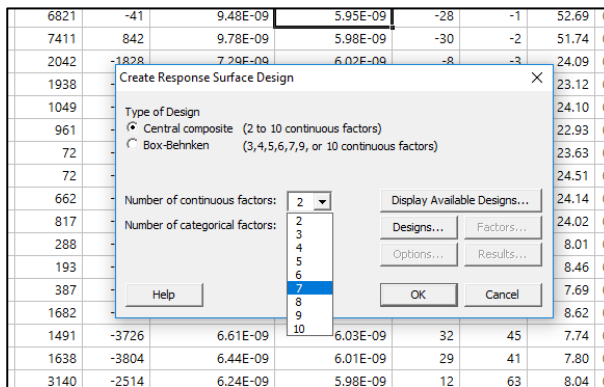

6. Look at the *Available Designs* proposed by Minitab.

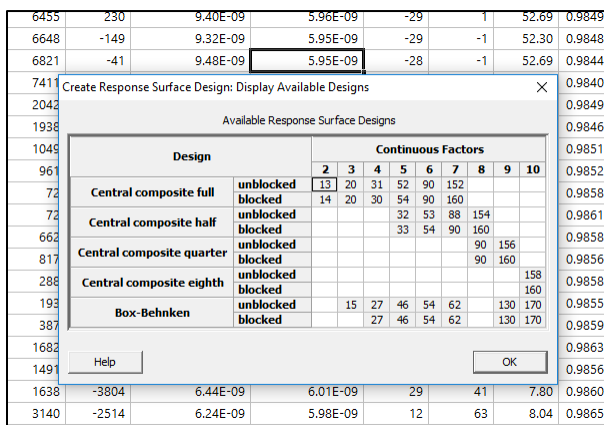

7. Choose one of the proposed *Designs*.

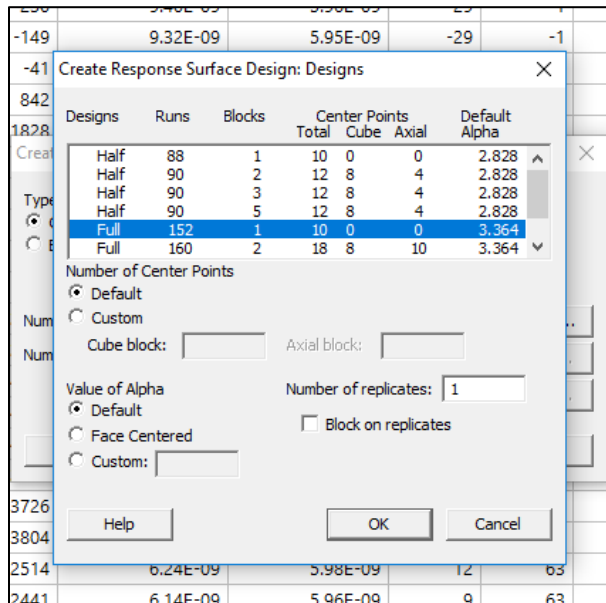

8. Define the *Factors*.

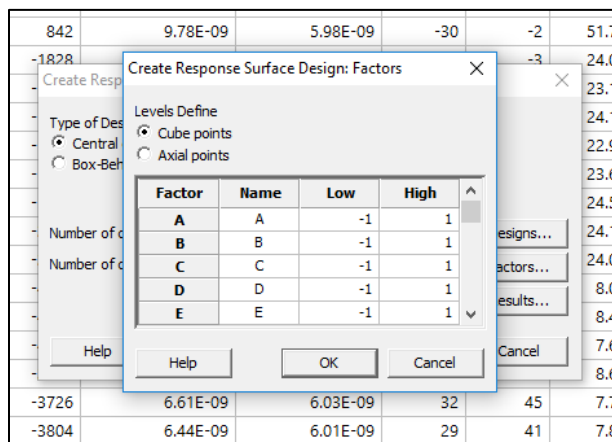

9. Define the *Options*:

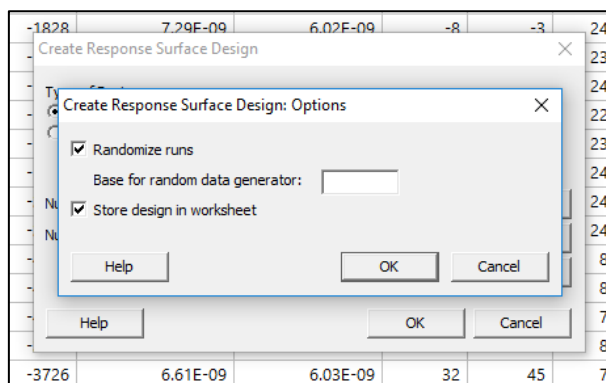

## 10. Define the *Results*.

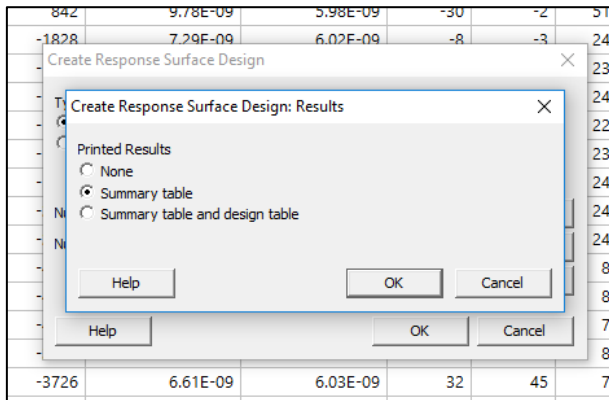

- Click OK - OK and Minitab will generate the specified Response Surface Design. The design appears in the *Session Window*, and the *Matrix Design* appears in the newly created *Worksheet 2*.

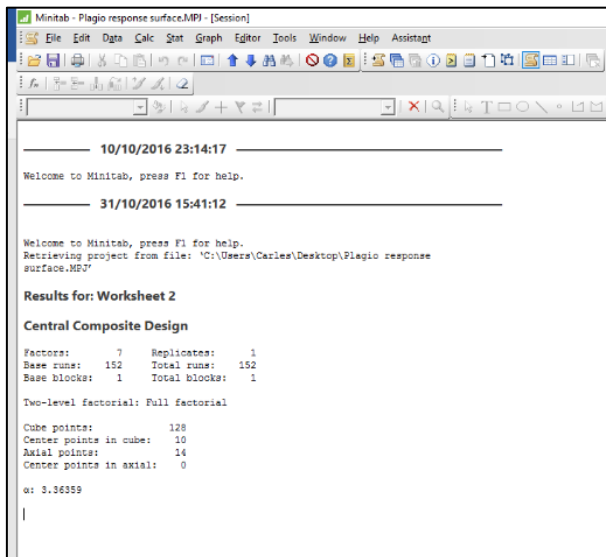

| Run | C1       | C2       | C3    | C4      | C5       | C6       | C7       | C8       | C9       | C10      | C11 | C12 |
|-----|----------|----------|-------|---------|----------|----------|----------|----------|----------|----------|-----|-----|
| 1   | StdOrder | RunOrder | Block | A       | B        | C        | D        | E        | F        | G        |     |     |
| 2   | 1        | 1        | 1     | 1.00000 | -1.00000 | -1.00000 | 1.00000  | 1.00000  | 1.00000  | -1.00000 |     |     |
| 3   | 145      | 2        | 0     | 1       | 0.00000  | 0.00000  | 0.00000  | 0.00000  | 0.00000  | 0.00000  |     |     |
| 4   | 3        | 3        | 1     | 1       | -1.00000 | 1.00000  | -1.00000 | -1.00000 | -1.00000 | -1.00000 |     |     |
| 5   | 21       | 4        | 1     | 1       | 1.00000  | 1.00000  | 1.00000  | 1.00000  | 1.00000  | 1.00000  |     |     |
| 6   | 40       | 5        | 1     | 1       | 1.00000  | 1.00000  | 1.00000  | 1.00000  | -1.00000 | 1.00000  |     |     |
| 7   | 116      | 6        | 1     | 1       | 1.00000  | -1.00000 | 1.00000  | -1.00000 | 1.00000  | 1.00000  |     |     |
| 8   | 77       | 7        | 1     | 1       | -1.00000 | -1.00000 | 1.00000  | -1.00000 | -1.00000 | 1.00000  |     |     |
| 9   | 147      | 8        | 0     | 1       | 0.00000  | 0.00000  | 0.00000  | 0.00000  | 0.00000  | 0.00000  |     |     |
| 10  | 61       | 9        | 1     | 1       | 1.00000  | 1.00000  | 1.00000  | 1.00000  | 1.00000  | 1.00000  |     |     |
| 11  | 138      | 10       | -1    | 1       | 0.00000  | 0.00000  | 0.00000  | 0.00000  | 0.00000  | 0.00000  |     |     |
| 12  | 42       | 11       | 1     | 1       | 1.00000  | -1.00000 | 1.00000  | -1.00000 | 1.00000  | 1.00000  |     |     |
| 13  | 120      | 12       | 1     | 1       | 1.00000  | 1.00000  | 1.00000  | -1.00000 | 1.00000  | 1.00000  |     |     |
| 14  | 53       | 13       | 1     | 1       | -1.00000 | -1.00000 | 1.00000  | -1.00000 | 1.00000  | -1.00000 |     |     |
| 15  | 77       | 14       | 1     | 1       | 1.00000  | 1.00000  | 1.00000  | 1.00000  | 1.00000  | 1.00000  |     |     |
| 16  | 4        | 15       | 1     | 1       | 1.00000  | 1.00000  | -1.00000 | -1.00000 | -1.00000 | -1.00000 |     |     |

12. Go back to the *Worksheet 1* (SIMS data). Select *Define Custom Response Surface Design*.

Worksheet 1 \*\*\*

|   | C1-D<br>Date | C2-D<br>Hour | C3-T<br>Label      | C4<br>X | C5<br>Y | C6<br>Chamber Pres |          |     |   |
|---|--------------|--------------|--------------------|---------|---------|--------------------|----------|-----|---|
| 1 | 22/07/2014   | 9:52:00 AM   | Pattern1_Ande003@3 | 6100    | 1791    | 8.28E-09           | 5.98E-09 | -24 | 4 |
| 2 | 22/07/2014   | 9:52:00 AM   | Pattern1_Ande001@1 | 5980    | 2231    | 8.58E-09           | 5.98E-09 | -22 | 6 |
| 3 | 22/07/2014   | 9:52:00 AM   | Pattern1_Ande002@2 | 5933    | 2004    | 8.77E-09           | 5.97E-09 | -23 | 4 |

13. With double click, select the *Continuous Factors* (predictor variables) from the left.

Define Custom Response Surface Design

Continuous Factors:

X Y Chamber Pressure Primary Intensity LT1defX LT1defY An IMF

Categorical Factors:

Select Low/High... Designs... Help OK Cancel

14. Define the *Low* and *High* Values for the Factors.

Define Custom Response Surface Design: Low/High

Low and High Values for Factors

| Factor | Name             | Low          | High         |
|--------|------------------|--------------|--------------|
| A      | X                | -9963        | 7411         |
| B      | Y                | -4926        | 7965         |
| C      | Chamber Pressu   | 0.0000000052 | 0.0000000099 |
| D      | Primary Intensit | 0.0000000055 | 0.0000000062 |
| E      | LT1defX          | -54          | 103          |

Worksheet Data Are

☐ Coded

☒ Uncoded

Help OK Cancel

15. Go to *Analyze Response Surface Design*:

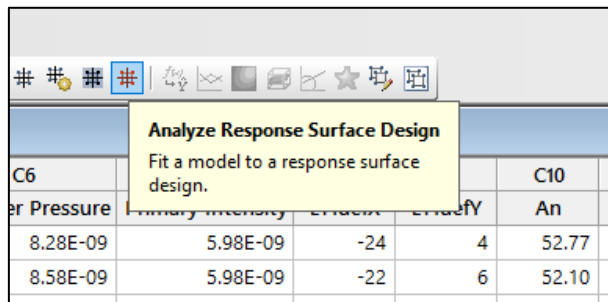

16. Introduce the *Response*. In this case IMF.

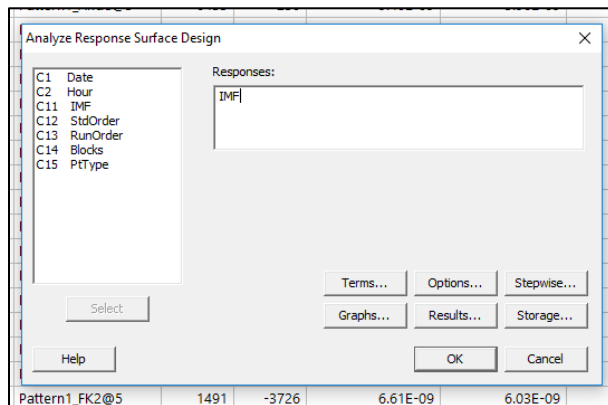

17. Select the initial model *Terms*.

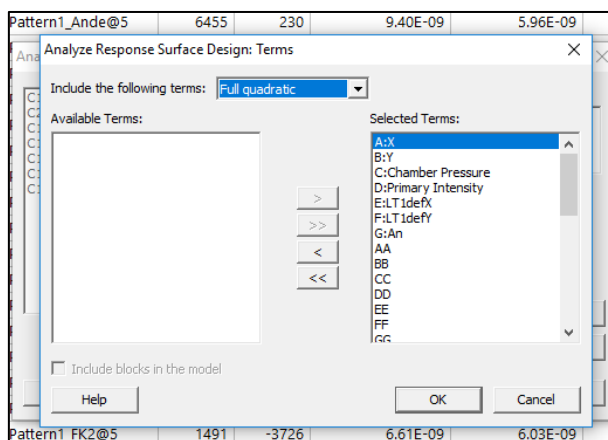

18. If desired, in *Options* you can weight and transform the variables.

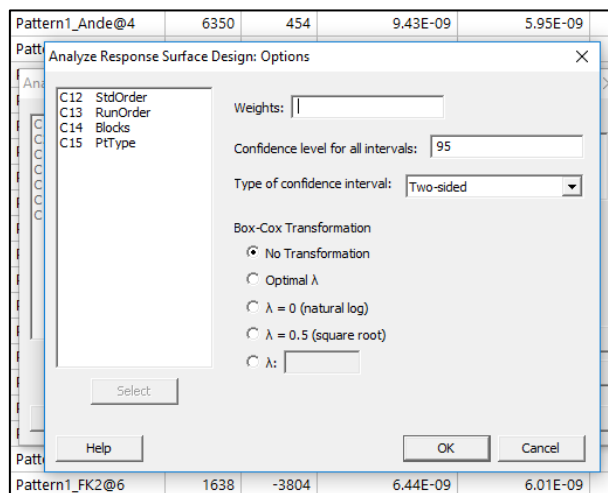

19. If desired, in Stewise you can select an automatic stepwise selection method of the model terms (we recommend None).

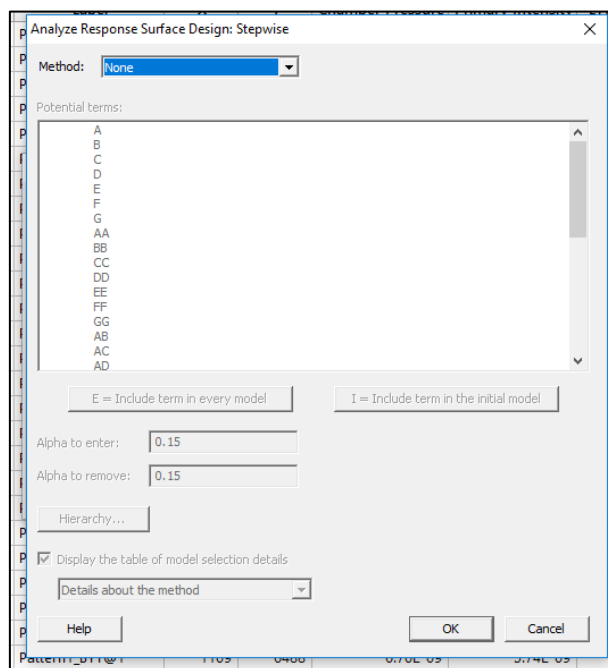

20. In **Graphs**, it is recommended to select *Standardized residuals* and *Four in one*:

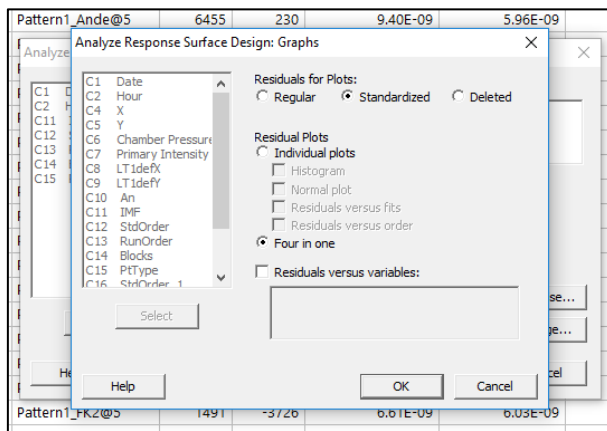

21. In **Results**, choose the results you want to visualize.

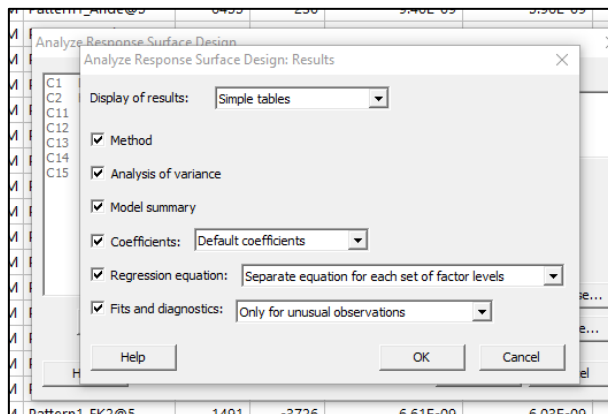

22. In **Storage**, choose (recommended) *Fits*, *Residuals*, *Standardized Residuals*, *Leverage* and *Cook's distance*. The values will be stored in the *Worksheet 1* in the final columns of the right. Click **OK** - **OK** and Minitab will create the starting **Response Surface Model**.

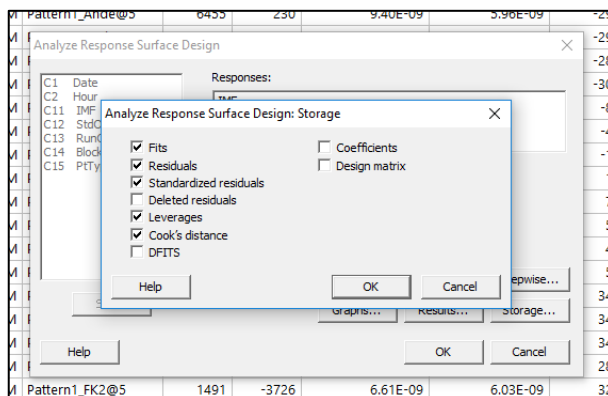



23. Check the *Residual Plots*:

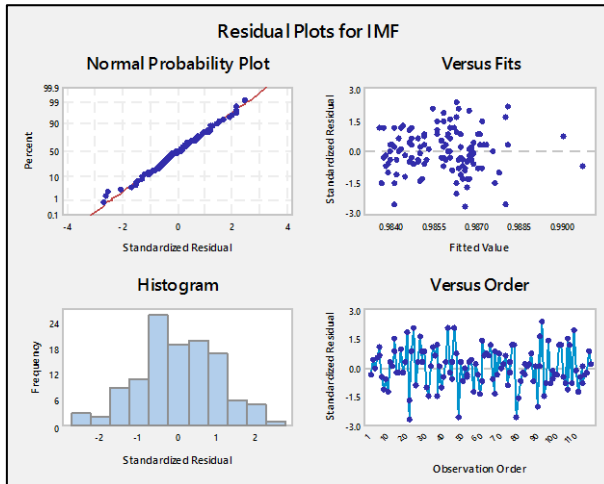

24. Check the *Leverage (HI)* and *Cook's distance (COOK)* of the model points looking for high influential observations.

| Plagioclase database *** |       |     |          |            |          |          |          |     |
|--------------------------|-------|-----|----------|------------|----------|----------|----------|-----|
| #                        | C21   | C22 | C23      | C24        | C25      | C26      | C27      | C28 |
|                          | PType |     | FITS     | RESI       | SRES     | HI       | COOK     |     |
| 1                        | 1     |     | 0.984775 | -0.0007906 | -1.85511 | 0.096418 | 0.022951 |     |
| 2                        | 1     |     | 0.984560 | -0.0004911 | -1.15153 | 0.095350 | 0.008735 |     |
| 3                        | 1     |     | 0.984602 | -0.0004053 | -0.94974 | 0.094198 | 0.005863 |     |
| 4                        | 1     |     | 0.984524 | 0.0002066  | 0.49105  | 0.119493 | 0.002045 |     |
| 5                        | 1     |     | 0.984558 | 0.0003695  | 0.87911  | 0.121358 | 0.006672 |     |
| 6                        | 1     |     | 0.984531 | 0.0003120  | 0.74413  | 0.125601 | 0.004971 |     |

25. In the *Session Window*, Minitab shows the *statistics of the model*. Check the *Model Summary*, which contains the statistics *S*, *R-sq* ( $R^2$ ), *R-sq adj.* (adjusted  $R^2$ ) and *R-sq pred.* (prediction  $R^2$ ). From the *Analysis of Variance*, decide the first term that shouldn't stay in the model, using as elimination criteria the *p-value*, the *VIF* or your background knowledge. In this example, the first term eliminated from the model will be *X\*Chamber Pressure*, because it displays the highest *p-value* (0.895) of all the terms.

Minitab - Plagio response surface.MPJ - [Session]

File Edit Data Calc Stat Graph Editor Tools Window Help Assistant

Model Summary

|  | S         | R-sq   | R-sq(adj) | R-sq(pred) |
|--|-----------|--------|-----------|------------|
|  | 0.0003758 | 94.61% | 92.33%    | 85.59%     |

Coded Coefficients

| Term                                | Effect    | Coef      | SE Coef  | T-Value | P-Value | VIF    |
|-------------------------------------|-----------|-----------|----------|---------|---------|--------|
| Constant                            |           | 0.985144  | 0.000446 | 2209.68 | 0.000   |        |
| X                                   | -0.002758 | -0.001379 | 0.000667 | -2.07   | 0.042   | 109.86 |
| Y                                   | 0.000801  | 0.000401  | 0.000377 | 1.06    | 0.292   | 48.29  |
| Chamber Pressure                    | -0.002586 | -0.001293 | 0.000621 | -2.08   | 0.040   | 66.95  |
| Primary Intensity                   | 0.000943  | 0.000471  | 0.000660 | 0.55    | 0.585   | 72.58  |
| LIdefX                              | -0.001628 | -0.000814 | 0.000717 | -1.14   | 0.259   | 101.90 |
| LIdefY                              | -0.002696 | -0.001348 | 0.000692 | -1.95   | 0.055   | 71.15  |
| An                                  | 0.005600  | 0.002800  | 0.000612 | 4.58    | 0.000   | 114.29 |
| X*X                                 | -0.002720 | -0.001360 | 0.000785 | -1.73   | 0.087   | 53.42  |
| Y*Y                                 | 0.000930  | 0.000465  | 0.000538 | 0.86    | 0.390   | 27.99  |
| Chamber Pressure*Chamber Pressure   | 0.000908  | 0.000444  | 0.000544 | 0.82    | 0.417   | 18.33  |
| Primary Intensity*Primary Intensity | -0.000757 | -0.000378 | 0.000830 | -0.46   | 0.650   | 17.02  |
| LIdefX*LIdefX                       | 0.001596  | 0.000798  | 0.000692 | 1.15    | 0.252   | 31.40  |
| LIdefY*LIdefY                       | 0.003496  | 0.001748  | 0.000610 | 2.87    | 0.005   | 23.92  |
| An*An                               | -0.000630 | -0.000315 | 0.000688 | -0.46   | 0.648   | 50.61  |
| X*Y                                 | -0.000293 | -0.000147 | 0.000916 | -0.16   | 0.873   | 35.25  |
| X*Chamber Pressure                  | 0.000221  | 0.000110  | 0.000835 | 0.13    | 0.895   | 69.80  |
| X*Primary Intensity                 | -0.004156 | -0.002078 | 0.000939 | -2.21   | 0.030   | 28.79  |
| X*LIdefX                            | 0.002354  | 0.001177  | 0.000541 | 2.17    | 0.033   | 27.95  |
| X*LIdefY                            | -0.003006 | -0.001503 | 0.000944 | -1.59   | 0.115   | 57.10  |
| X*An                                | -0.002093 | -0.001046 | 0.000641 | -1.63   | 0.106   | 50.48  |
| Y*Chamber Pressure                  | 0.002079  | 0.001039  | 0.000676 | 1.54    | 0.128   | 35.12  |
| Y*Primary Intensity                 | -0.004218 | -0.002109 | 0.000938 | -2.25   | 0.027   | 35.24  |
| Y*LIdefX                            | 0.001515  | 0.000757  | 0.000749 | 1.01    | 0.315   | 44.57  |

26. Go back to *Terms* (Ctrl+E) and move the term decided in Step 25 (*X\*Chamber Pressure in the example*) from the list of *Selected Terms* to the list of *Available Terms*.

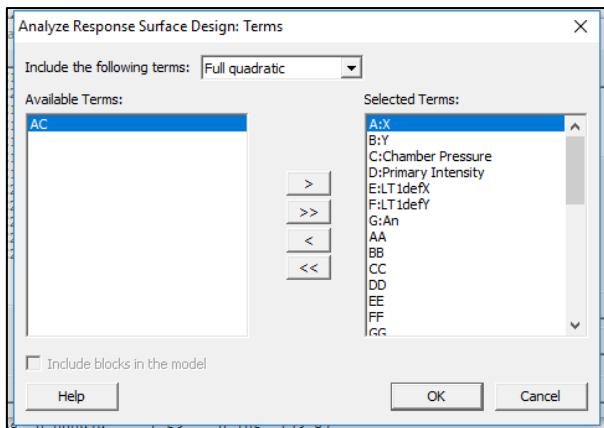

27. Click *OK-OK* and run the model again. Repeat the backward selection process of steps 23-24-25-26 until a satisfactory model is reached. Most of the terms remaining in the final model should be significant for the regression ( $p\text{-value} \leq 0.05$ ) and present low multicollinearity ( $VIF \leq 10$ ). The single terms of a hierarchical model can be no significant ( $p\text{-value} \geq 0.05$ ).

Model Summary

| S         | R-sq   | R-sq(adj) | R-sq(pred) |
|-----------|--------|-----------|------------|
| 0.0004484 | 90.47% | 89.09%    | 86.74%     |

  

Coded Coefficients

| Term            | Effect    | Coef      | SE Coef  | T-Value | P-Value | VIF  |
|-----------------|-----------|-----------|----------|---------|---------|------|
| Constant        |           | 0.985444  | 0.000125 | 7852.86 | 0.000   |      |
| X               | -0.000592 | -0.000296 | 0.000106 | -2.80   | 0.006   | 1.94 |
| Y               | -0.000127 | -0.000064 | 0.000099 | -0.64   | 0.524   | 2.36 |
| CP              | -0.001696 | -0.000848 | 0.000187 | -4.53   | 0.000   | 4.27 |
| PI              | 0.000038  | 0.000019  | 0.000297 | 0.06    | 0.949   | 6.08 |
| LTldefX         | -0.000883 | -0.000442 | 0.000171 | -2.58   | 0.011   | 4.09 |
| LTldefY         | 0.000090  | 0.000045  | 0.000169 | 0.27    | 0.790   | 2.97 |
| An              | 0.003279  | 0.001639  | 0.000127 | 12.91   | 0.000   | 3.46 |
| X*X             | -0.004733 | -0.002366 | 0.000213 | -11.11  | 0.000   | 2.77 |
| LTldefX*LTldefY | 0.005032  | 0.002516  | 0.000301 | 8.36    | 0.000   | 4.18 |
| LTldefY*LTldefY | 0.002678  | 0.001339  | 0.000217 | 6.16    | 0.000   | 2.14 |
| X*An            | -0.004078 | -0.002039 | 0.000220 | -9.29   | 0.000   | 4.16 |
| Y*PI            | -0.002055 | -0.001028 | 0.000438 | -2.35   | 0.021   | 5.40 |
| Y*An            | 0.002364  | 0.001182  | 0.000346 | 3.42    | 0.001   | 6.50 |
| LTldefX*LTldefY | 0.002117  | 0.001058  | 0.000403 | 2.63    | 0.010   | 5.39 |
| LTldefX*An      | -0.002931 | -0.001465 | 0.000230 | -6.36   | 0.000   | 2.85 |

  

Regression Equation in Uncoded Units

IMF = 0.98306 + 0.000000 X + 0.000002 Y - 362389 CP + 697098 PI - 0.000011 LTldefX  
- 0.000018 LTldefY + 0.000032 An - 0.000000 X\*X + 0.000000 LTldefX\*LTldefX  
+ 0.000000 LTldefY\*LTldefY - 0.000000 X\*An - 425 Y\*PI + 0.000000 Y\*An  
+ 0.000000 LTldefX\*LTldefY - 0.000000 LTldefX\*An

  

Fits and Diagnostics for Unusual Observations

| Obs | IMF      | Fit      | Resid     | Std Resid |
|-----|----------|----------|-----------|-----------|
| 9   | 0.984952 | 0.985820 | -0.000869 | -2.02 R   |
| 10  | 0.984614 | 0.985709 | -0.001095 | -2.55 R   |
| 24  | 0.986922 | 0.985866 | 0.001056  | 2.59 R    |
| 37  | 0.983517 | 0.984610 | -0.001093 | -2.60 R   |
| 39  | 0.983772 | 0.984885 | -0.001114 | -2.70 R   |
| 42  | 0.985685 | 0.984668 | 0.001017  | 2.52 R    |
| 46  | 0.988683 | 0.987705 | 0.000979  | 2.37 R    |
| 50  | 0.980551 | 0.980996 | -0.000444 | -1.49 X   |
| 80  | 0.983119 | 0.984003 | -0.000884 | -2.11 R   |

R Large residual  
X Unusual X

28. Check the *Leverage* and *Cook's distance* of the model points to ensure that the final fitted model does not contain highly influential points.

29. Go to *Predict*.

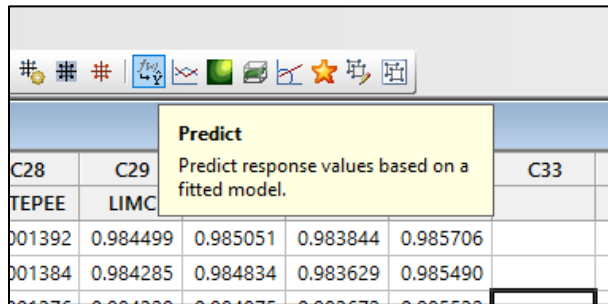

| C28    | C29      | C33      | C34      |
|--------|----------|----------|----------|
| TEPEE  | LIMC     |          |          |
| 001392 | 0.984499 | 0.985051 | 0.983844 |
| 001384 | 0.984285 | 0.984834 | 0.983629 |

30. Enter the columns of values for prediction. The predicted values will be stored in the final columns of the right:

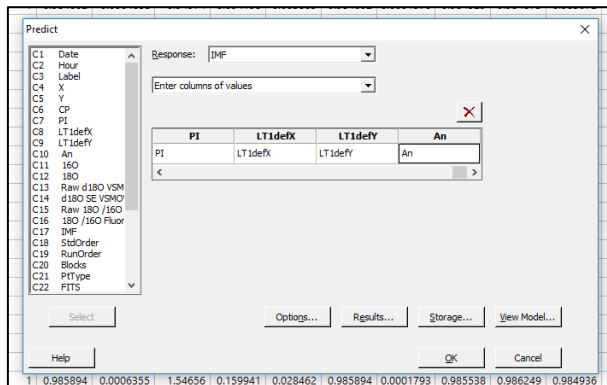

Predict

Response: IMF

Enter columns of values

Options... Results... Storage... View Model...

Help

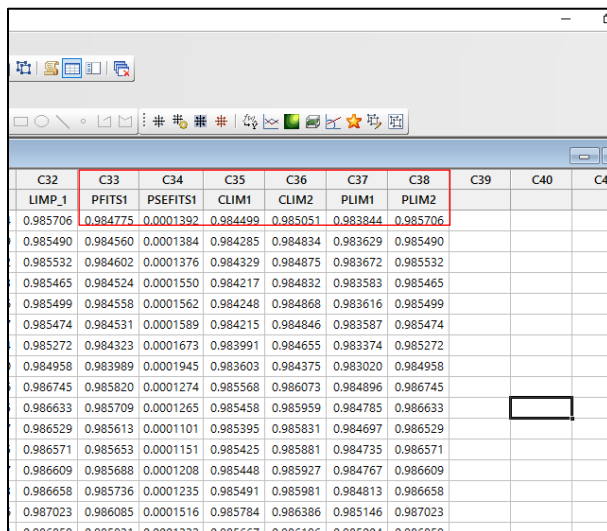

| C32      | C33      | C34       | C35      | C36      | C37      | C38      | C39 | C40 | C41 |
|----------|----------|-----------|----------|----------|----------|----------|-----|-----|-----|
| LIMP_1   | PFITS1   | PSEFITS1  | CLIM1    | CLIM2    | PLIM1    | PLIM2    |     |     |     |
| 0.985706 | 0.984775 | 0.0001392 | 0.984499 | 0.985051 | 0.983844 | 0.985706 |     |     |     |
| 0.985490 | 0.984560 | 0.0001384 | 0.984285 | 0.984834 | 0.983629 | 0.985490 |     |     |     |
| 0.985532 | 0.984602 | 0.0001376 | 0.984329 | 0.984875 | 0.983672 | 0.985532 |     |     |     |
| 0.985465 | 0.984524 | 0.0001550 | 0.984217 | 0.984832 | 0.983583 | 0.985465 |     |     |     |
| 0.985499 | 0.984558 | 0.0001562 | 0.984248 | 0.984868 | 0.983616 | 0.985499 |     |     |     |
| 0.985474 | 0.984531 | 0.0001589 | 0.984215 | 0.984846 | 0.983587 | 0.985474 |     |     |     |
| 0.985272 | 0.984323 | 0.0001673 | 0.983991 | 0.984655 | 0.983374 | 0.985272 |     |     |     |
| 0.984958 | 0.983989 | 0.0001945 | 0.983603 | 0.984375 | 0.983020 | 0.984958 |     |     |     |
| 0.986745 | 0.985820 | 0.0001274 | 0.985568 | 0.986073 | 0.984896 | 0.986745 |     |     |     |
| 0.986633 | 0.985709 | 0.0001265 | 0.985458 | 0.985959 | 0.984785 | 0.986633 |     |     |     |
| 0.986529 | 0.985613 | 0.0001101 | 0.985395 | 0.985831 | 0.984697 | 0.986529 |     |     |     |
| 0.986571 | 0.985653 | 0.0001151 | 0.985425 | 0.985881 | 0.984735 | 0.986571 |     |     |     |
| 0.986609 | 0.985688 | 0.0001208 | 0.985448 | 0.985927 | 0.984767 | 0.986609 |     |     |     |
| 0.986658 | 0.985736 | 0.0001235 | 0.985491 | 0.985981 | 0.984813 | 0.986658 |     |     |     |
| 0.987023 | 0.986085 | 0.0001516 | 0.985784 | 0.986386 | 0.985146 | 0.987023 |     |     |     |
| 0.986859 | 0.985931 | 0.0001332 | 0.985667 | 0.986196 | 0.985004 | 0.986859 |     |     |     |

31. Generate the scatterplot of the predicted vs. the actual IMF values. The points should follow a 1:1 slope.

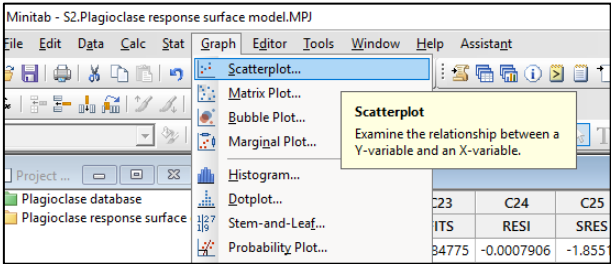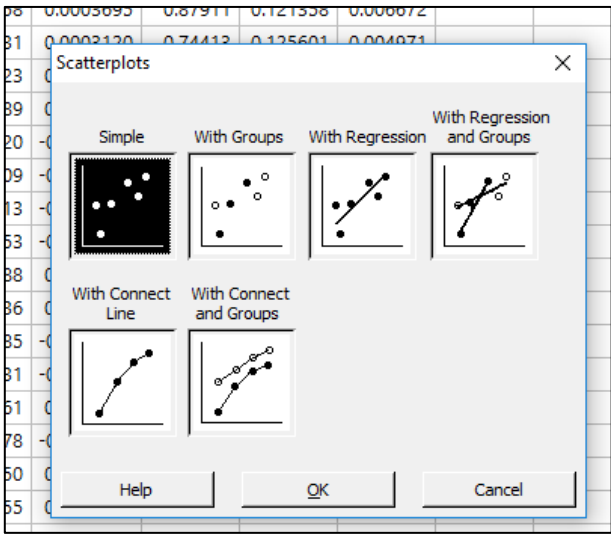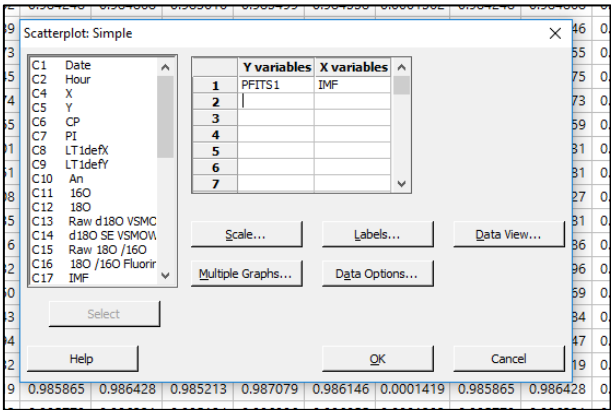

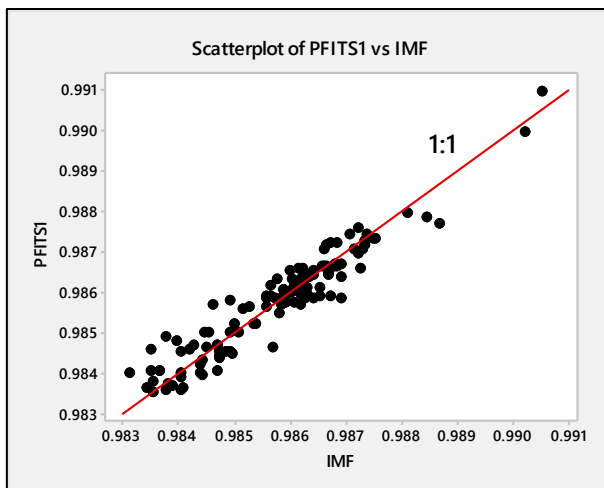

32. If desired, you can generate 3D surfaces or contour plots to visualize the behavior of the response respect to different pairs of predictor variables.

The screenshot displays a software interface with a data table and a 'Surface Plot' dialog box.

**Data Table:**

| C30   | C31      | C32      | C36      | C37       | C38      |
|-------|----------|----------|----------|-----------|----------|
| MC_1  | LIMP     | LIMP_1   | CLIM2    | PLIM1     | PLI      |
| 85051 | 0.983844 | 0.985706 | 0.985051 | 0.983844  | 0.98     |
| 84834 | 0.983629 | 0.985496 | 0.984834 | 0.983629  | 0.98     |
| 84875 | 0.983672 | 0.985532 | 0.984602 | 0.0001376 | 0.984329 |
| 84832 | 0.983583 | 0.985465 | 0.984524 | 0.0001550 | 0.984217 |

**Surface Plot Dialog Box:**

- Response:** IMF
- Variables:**
  - ☒ Select a pair of variables for a single plot
    - X Axis: X
    - Y Axis: Y
  - ☐ Generate plots for all pairs of continuous variables
    - ☒ In separate panels of the same graph
    - ☐ On separate graphs
- Buttons:** Settings..., Options..., View Model..., Help, OK, Cancel

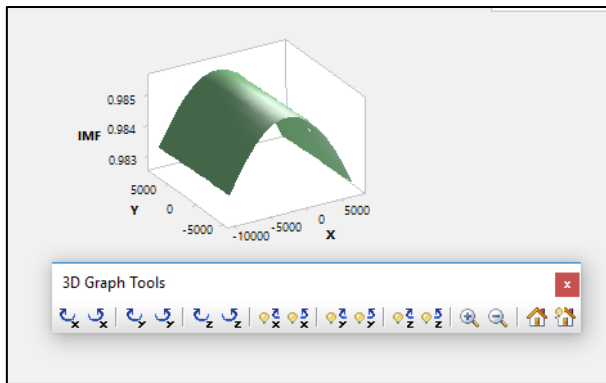

The 3D surfaces can be rotated with the *3D Graph Tools* toolbar.

33. A double click on each part of the graph (surface, axis, title...) opens the respective edition window.

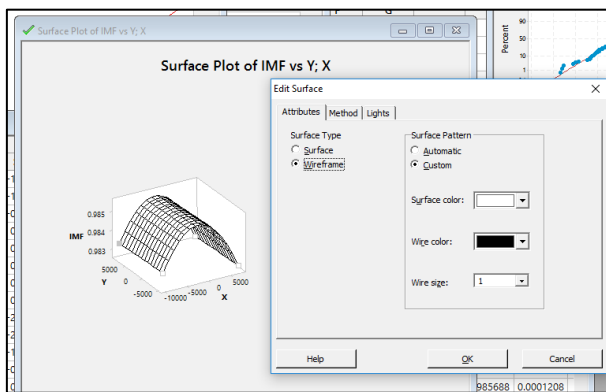

Supplement: c6ja00397d4.pdf [file c6ja00397d4.pdf]
