# Supplementary material for: Predicting instrumental mass fractionation (IMF) of stable isotope SIMS analyses by response surface methodology (RSM)
Source: Royal Society of Chemistry journal article supplement (doi:10.1039/c6ja00397d), 2017-01-01
Supplement: c6ja00397d2.xlsx [file c6ja00397d2.xlsx]

## Sheet: Read me
	NOTES
1	This electronic supporting information S2 contains the SIMS, EPMA and fluorination data used in "Predicting instrumental mass fractionation (IMF) of stable isotope SIMS analyses by response surface methodology (RSM)" by Fàbrega et al.
2	Sheets 1, 2 and 3 contain the raw SIMS and EPMA data of plagioclase, K-feldspar and quartz.
3	Sheet 4 contains the n fluorination results of each standard, the average and the method used to calculate the standard error.
4	Recieving feedback about the data presented in this study will be a pleasure.

## Sheet: 1.Plagioclase SIMS+EPMA data
		SIMS and EPMA data of plagioclase standards		SIMS DATA→																								EPMA DATA→
				Centre de Recherches Pétrographiques et Géochimiques, Nancy. Cameca IMF 1280 HR.																								Centres Científics i Tecnològics de la Universitat de Barcelona. Jeol JXA-8230.
								Chamber	Primary					Field	Offset					d18O ‰	Error ‰		SIMS	Fluorination	calculated	calculated		Feldspar composition			Oxide %
		Standard	Analysis	Date	Hour	X (µm)	Y (µm)	Pressure (Torr)	Intensity (A)	LT1 def X	LT1 def Y	CA def X	CA def Y	Drift	Drift	Bf_L'2	Bf_H1	16O	18O	VSMOW	VSMOW	nb cycles	18O /16O	18O /16O	IMF	IMF (‰)		An	Ab	Or	Al2O3	SiO2	CaO	TiO2	Na2O	MgO	MnO	FeO	BaO	K2O	SrO	Rb2O
		Gstd0004	Pattern1_Ande003@3	2014-07-22	09:52:00	6100	1791	8.28e-09	5.98e-09	-24	4	0	31	nd	nd	45653	11556	3.12659e+09	6.2153e+06	0.44	0.04482	30	0.00198788	0.00202024	0.983984	-16.0156		51.3715	45.7247	2.94394	27.12	56.23	10.08	0.0061	5.26	0.0803	0	0.385	0.0052	0.4783	0.0152	0
			Pattern1_Ande001@1	2014-07-22	09:52:00	5980	2231	8.58e-09	5.98e-09	-22	6	0	32	nd	nd	48478	11148	3.10671e+09	6.17631e+06	0.529	0.06036	30	0.00198805	0.00202024	0.984069	-15.9312		51.679	45.6326	2.69966	27.35	56.02	10.04	0.002	5.28	0.0937	0.0216	0.4087	0	0.4454	0.1742	0
			Pattern1_Ande002@2	2014-07-22	09:52:00	5933	2004	8.77e-09	5.97e-09	-23	4	0	32	nd	nd	45025	11054	3.12492e+09	6.21331e+06	0.736	0.06081	30	0.00198831	0.00202024	0.984197	-15.8035		50.0956	47.0749	2.86899	27.23	56.32	9.82	0.0569	5.41	0.097	0.0317	0.3677	0.0258	0.4656	0.1958	0
			Pattern1_Ande@4	2014-07-22	10:24:00	6350	454	9.43e-09	5.95e-09	-28	1	0	32	nd	nd	44397	12320	3.13902e+09	6.24474e+06	1.085	0.05956	30	0.00198939	0.00202024	0.984731	-15.2691		50.1641	47.0608	2.81865	27.22	56.14	9.8	0.0426	5.39	0.1028	0.0058	0.3423	0	0.4551	0.1914	0
			Pattern1_Ande@5	2014-07-22	10:28:00	6455	230	9.4e-09	5.96e-09	-29	1	0	29	nd	nd	56535	12226	3.14529e+09	6.25846e+06	1.308	0.04867	30	0.00198979	0.00202024	0.984927	-15.0728		50.6396	46.4899	2.92821	27.05	55.74	9.81	0.0386	5.28	0.0871	0	0.3095	0.1031	0.4668	0.1307	0.0301
			Pattern1_Ande@6	2014-07-22	10:32:00	6648	-149	9.32e-09	5.95e-09	-29	-1	0	30	nd	nd	54756	12791	3.11586e+09	6.19936e+06	1.111	0.07348	30	0.00198962	0.00202024	0.984843	-15.1575		49.8263	47.4964	2.67739	27.24	56.03	9.77	0.0448	5.46	0.0966	0	0.422	0	0.4407	0.0395	0
			Pattern1_Ande@7	2014-07-22	10:36:00	6821	-41	9.48e-09	5.95e-09	-28	-1	0	28	nd	nd	55488	12383	3.09087e+09	6.14711e+06	0.745	0.06738	30	0.00198879	0.00202024	0.984434	-15.5657		50.8449	46.4763	2.7273	27.21	55.78	9.89	0.0691	5.3	0.0469	0.0259	0.4127	0	0.4374	0.1442	0
			Pattern1_Ande@9	2014-07-22	10:44:00	7411	842	9.78e-09	5.98e-09	-30	-2	0	23	nd	nd	56011	11891	3.11472e+09	6.19217e+06	0.458	0.05047	30	0.00198803	0.00202024	0.984059	-15.9413		50.3065	46.9943	2.73723	27.14	55.86	9.86	0.0305	5.4	0.0938	0.0086	0.3929	0.0361	0.4441	0.0995	0
		Gstd0003	Pattern1_OLIG@1	2014-07-22	11:18:00	2042	-1828	7.29e-09	6.02e-09	-8	-3	0	31	nd	nd	50571	11169	3.27674e+09	6.52472e+06	2.268	0.05754	30	0.00199122	0.00202164	0.984952	-15.0481		22.7466	74.7308	2.55491	23.02	63.82	4.33	0.0102	8.34	0	0	0.0306	0	0.4031	0.0968	0
			Pattern1_OLIG@2	2014-07-22	11:22:00	1938	-1709	7.12e-09	6.03e-09	-4	0	0	29	nd	nd	60511	11211	3.25512e+09	6.47944e+06	1.909	0.0528	30	0.00199054	0.00202164	0.984614	-15.3861		22.5145	74.8077	2.69359	23.25	63.9	4.42	0	8.61	0.0178	0.013	0.0106	0	0.4413	0	0
			Pattern1_OLIG@3	2014-07-22	11:26:00	1049	-1238	7.1e-09	6.02e-09	-1	2	0	28	nd	nd	60301	11525	3.30721e+09	6.58685e+06	2.455	0.0548	30	0.00199166	0.00202164	0.98517	-14.8297		23.1445	74.5495	2.32738	23.23	64.25	4.48	0	8.46	0	0	0.0464	0	0.3747	0.0314	0
			Pattern1_OLIG@4	2014-07-22	11:30:00	961	-1341	6.87e-09	6.02e-09	1	2	0	24	nd	nd	61034	11409	3.29886e+09	6.57086e+06	2.569	0.05969	30	0.00199186	0.00202164	0.985268	-14.7318		22.3207	75.4496	2.24302	23.04	63.69	4.38	0.0264	8.68	0	0.0245	0.0438	0.1029	0.3673	0.0461	0
			Pattern1_OLIG@5	2014-07-22	11:34:00	72	-1516	6.81e-09	6.02e-09	7	-1	0	25	nd	nd	62185	12069	3.29997e+09	6.57697e+06	3.028	0.0517	30	0.00199304	0.00202164	0.985852	-14.1483		22.4528	75.7943	1.77272	22.91	63.75	4.3	0.0102	8.51	0.0171	0	0.0663	0.0257	0.2818	0.0447	0
			Pattern1_OLIG@6	2014-07-22	11:38:00	72	-1382	6.81e-09	6.02e-09	5	-2	0	24	nd	nd	59255	11995	3.29261e+09	6.56398e+06	3.326	0.06723	30	0.00199355	0.00202164	0.986103	-13.8968		23.2112	74.6249	2.191	23.19	63.84	4.43	0	8.35	0	0.0274	0.0689	0	0.3467	0.0495	0
			Pattern1_OLIG@7	2014-07-22	11:43:00	662	-2132	6.68e-09	6.01e-09	4	-11	0	24	nd	nd	56116	11106	3.28153e+09	6.54048e+06	3.241	0.05916	30	0.00199312	0.00202164	0.985892	-14.1078		22.6406	75.3416	2.04656	23.02	63.69	4.28	0.002	8.35	0.0042	0	0.0557	0.0206	0.3202	0.0882	0
			Pattern1_OLIG@8	2014-07-22	11:47:00	817	-2010	6.74e-09	6e-09	5	-8	0	22	nd	nd	57999	12058	3.27019e+09	6.51639e+06	2.858	0.04975	30	0.00199266	0.00202164	0.985665	-14.3346		23.1064	74.8666	2.04495	23.21	63.71	4.48	0.004	8.51	0	0.049	0.0371	0	0.3299	0	0
		Gstd0001	Pattern1_FK2@1	2014-07-22	13:15:00	288	-4333	7.12e-09	6e-09	34	33	0	19	nd	nd	38224	4567	3.32911e+09	6.64526e+06	5.756	0.05801	30	0.00199611	0.00202472	0.98587	-14.13		7.58922	90.8826	1.53426	20.71	68.22	1.45	0.0082	10.18	0	0	0.1181	0.0411	0.2451	0	0
			Pattern1_FK2@2	2014-07-22	13:19:00	193	-4511	7.1e-09	6.01e-09	34	27	0	17	nd	nd	43456	4671	3.33155e+09	6.64822e+06	5.453	0.06286	30	0.00199554	0.00202472	0.985587	-14.4126		7.93588	90.4223	1.64994	20.79	67.53	1.5	0	10.02	0	0	0.1287	0	0.2605	0	0
			Pattern1_FK2@3	2014-07-22	13:23:00	387	-4520	7e-09	6.02e-09	34	26	0	21	nd	nd	47222	5309	3.32037e+09	6.62848e+06	5.744	0.05343	30	0.00199631	0.00202472	0.985968	-14.0322		7.15085	91.5225	1.33333	20.94	67.87	1.3407	0.004	10.06	0	0	0.1553	0	0.2088	0.063	0
			Pattern1_FK2@4	2014-07-22	13:27:00	1682	-3531	6.87e-09	6.02e-09	28	48	0	16	nd	nd	35817	4587	3.35008e+09	6.6902e+06	6.218	0.05201	30	0.00199702	0.00202472	0.986323	-13.6772		7.98113	90.3605	1.66823	20.87	68	1.49	0	9.89	0	0	0.114	0	0.2599	0.0937	0
			Pattern1_FK2@5	2014-07-22	13:31:00	1491	-3726	6.61e-09	6.03e-09	32	45	0	15	nd	nd	38956	5341	3.34641e+09	6.67829e+06	5.416	0.07371	30	0.00199566	0.00202472	0.985648	-14.3516		7.10965	91.003	1.89835	20.85	67.9	1.3166	0.006	9.88	0.0052	0.0058	0.1577	0	0.2934	0.024	0
			Pattern1_FK2@6	2014-07-22	13:36:00	1638	-3804	6.44e-09	6.01e-09	29	41	0	17	nd	nd	37805	5561	3.31819e+09	6.62456e+06	5.768	0.06521	30	0.00199644	0.00202472	0.986032	-13.9679		7.38619	90.6032	2.01852	20.61	67.96	1.41	0	10.14	0	0	0.1353	0.0103	0.3222	0.0056	0
			Pattern1_FK2@7	2014-07-22	13:40:00	3140	-2514	6.24e-09	5.98e-09	12	63	0	13	nd	nd	31946	5016	3.30948e+09	6.6105e+06	6.354	0.05591	30	0.00199744	0.00202472	0.986529	-13.471		7.3947	90.6986	1.91808	20.73	68.04	1.3712	0.0223	9.86	0	0.0014	0.1286	0	0.2968	0.0911	0
			Pattern1_FK2@8	2014-07-22	13:44:00	3022	-2441	6.14e-09	5.96e-09	9	63	0	13	nd	nd	31946	4587	3.30148e+09	6.59715e+06	6.819	0.05479	30	0.00199824	0.00202472	0.986922	-13.0784		6.92279	91.3187	1.76453	20.72	67.56	1.3267	0	10.26	0	0.0418	0.1128	0	0.2829	0.0759	0
			Pattern1_FK2@9	2014-07-22	13:48:00	3040	-2279	6.14e-09	5.99e-09	11	65	0	12	nd	nd	33516	5393	3.27895e+09	6.54744e+06	5.922	0.05197	30	0.00199681	0.00202472	0.986215	-13.7851		6.81267	91.4003	1.78902	20.8	67.83	1.3502	0	10.62	0	0.0014	0.1605	0.0154	0.2973	0.0896	0
		Gstd0008	Pattern1_BYT@1	2014-07-22	15:15:00	-1109	6488	6.7e-09	5.74e-09	75	48	0	10	nd	nd	40631	4148	3.11401e+09	6.2122e+06	5.179	0.05592	30	0.00199492	0.00201894	0.988106	-11.8939		68.7945	30.6487	0.563384	30.16	51.07	13.63	0.0265	3.56	0.1111	0	0.4783	0.1188	0.0926	0.0683	0.0202
			Pattern1_BYT@3	2014-07-22	15:23:00	-1036	6349	6.26e-09	5.82e-09	77	45	0	7	nd	nd	42514	5749	3.13922e+09	6.26485e+06	5.306	0.04852	30	0.00199567	0.00201894	0.988477	-11.5235		68.0591	31.3431	0.600443	30.08	51.33	13.63	0.0529	3.68	0.1176	0.0331	0.5311	0.0826	0.1005	0.0954	0
			Pattern1_BYT@4	2014-07-22	15:27:00	-492	5107	6.06e-09	5.85e-09	69	19	0	14	nd	nd	43560	6900	3.12789e+09	6.23392e+06	3.774	0.0728	30	0.00199301	0.00201894	0.987158	-12.8422		68.7482	30.5303	0.733724	30.1	51.55	13.52	0.1079	3.52	0.1904	0.0417	0.4177	0	0.1191	0.0962	0.0101
			Pattern1_BYT@5	2014-07-22	15:31:00	-288	5108	5.9e-09	5.87e-09	67	18	0	15	nd	nd	44711	6607	3.14746e+09	6.27338e+06	3.904	0.06909	30	0.00199316	0.00201894	0.987232	-12.7681		68.3239	31.0889	0.593133	30.28	51.49	13.57	0.0509	3.62	0.141	0.0058	0.4401	0	0.0979	0.0367	0
			Pattern1_BYT@6	2014-07-22	15:35:00	-398	5300	5.76e-09	5.9e-09	69	22	0	14	nd	nd	45862	7057	3.16378e+09	6.30635e+06	3.906	0.06452	30	0.00199329	0.00201894	0.987299	-12.7014		67.9087	31.373	0.723177	30.37	51.18	13.55	0.0123	3.67	0.1263	0.036	0.4266	0	0.1203	0	0
			Pattern1_BYT@7	2014-07-22	15:39:00	339	6509	5.65e-09	5.93e-09	70	46	0	8	nd	nd	45757	7831	3.21554e+09	6.41012e+06	3.899	0.0501	30	0.00199348	0.00201894	0.987393	-12.6067		67.6585	31.6766	0.670123	30.13	51.53	13.48	0.057	3.7	0.1425	0	0.4309	0.0361	0.1112	0.0481	0
			Pattern1_BYT@8	2014-07-22	15:43:00	219	6357	5.78e-09	5.95e-09	71	45	0	6	nd	nd	46908	8134	3.19539e+09	6.36801e+06	3.537	0.04996	30	0.00199287	0.00201894	0.987092	-12.9085		68.8857	30.4626	0.664314	30.23	51.52	13.5	0.0407	3.5	0.1572	0	0.4574	0.0258	0.1072	0	0
			Pattern1_BYT@9	2014-07-22	15:47:00	423	6304	5.56e-09	5.97e-09	70	43	0	7	nd	nd	46281	7360	3.21607e+09	6.41204e+06	4.107	0.04412	30	0.00199375	0.00201894	0.987525	-12.4753		68.3589	31.0644	0.587765	30.03	51.49	13.4	0	3.57	0.1636	0.059	0.3822	0	0.0949	0.1457	0
		Gstd0002	Pattern1_ALBITE2@1	2014-07-22	15:52:00	-7318	3726	5.56e-09	5.99e-09	81	-4	0	15	nd	nd	33934	5341	3.26683e+09	6.52853e+06	6.791	0.05354	30	0.00199843	0.00203	0.984447	-15.5525		8.33891	91.1778	0.486232	21.08	67.74	1.56	0.0162	10	0	0.0144	0.0013	0.0616	0.0759	0.2653	0
			Pattern1_ALBITE2@2	2014-07-22	15:56:00	-7537	3738	5.41e-09	6.01e-09	83	-6	0	16	nd	nd	34353	5215	3.26826e+09	6.53109e+06	6.738	0.04282	30	0.00199834	0.00203	0.984404	-15.5957		9.01184	90.5313	0.459077	21.29	66.66	1.72	0	10.13	0	0	0	0	0.0732	0.267	0
			Pattern1_ALBITE2@3	2014-07-22	16:00:00	-7358	3652	5.4e-09	6.01e-09	82	-5	0	14	nd	nd	35190	5853	3.26819e+09	6.53295e+06	6.977	0.05232	30	0.00199895	0.00203	0.984706	-15.2941		7.14158	91.9447	0.913677	20.73	66.98	1.46	0	11.02	0	0	0.0331	0.0411	0.1568	0.1799	0
			Pattern1_ALBITE2@4	2014-07-22	16:04:00	-8354	3236	5.38e-09	6.01e-09	98	-12	0	16	nd	nd	33829	5372	3.17435e+09	6.33771e+06	5.809	0.05404	30	0.00199654	0.00203	0.983517	-16.4833		10.2625	89.14	0.601008	21.62	67.17	1.95	0.0385	9.93	0	0.0476	0.0477	0.0822	0.0953	0.1649	0
			Pattern1_ALBITE2@5	2014-07-22	16:08:00	-8325	3062	5.4e-09	6.02e-09	99	-9	0	13	nd	nd	33725	5341	3.22298e+09	6.43974e+06	6.599	0.05268	30	0.00199807	0.00203	0.984271	-15.7287		10.1366	89.1031	0.766118	21.73	67.17	1.89	0	9.74	0	0	0	0	0.119	0.1361	0
			Pattern1_ALBITE2@6	2014-07-22	16:12:00	-8472	3137	5.4e-09	6.03e-09	103	-13	0	16	nd	nd	34457	5383	3.13054e+09	6.25185e+06	6.057	0.05631	30	0.00199705	0.00203	0.983772	-16.2282		10.5057	89.0527	0.444777	21.37	67.53	1.97	0	9.79	0	0.0029	0.0119	0.036	0.0695	0.1852	0
			Pattern1_ALBITE2@7	2014-07-22	16:16:00	-7628	2198	5.43e-09	6.02e-09	95	1	0	13	nd	nd	34562	5152	3.3085e+09	6.61345e+06	7.082	0.05564	30	0.00199893	0.00203	0.984694	-15.306		2.95024	96.7945	0.255596	20.3	68.87	0.5646	0	10.86	0.0114	0	0.0186	0	0.041	0.1529	0
			Pattern1_ALBITE2@8	2014-07-22	16:20:00	-7514	2133	5.65e-09	6e-09	94	3	0	12	nd	nd	34980	6010	3.32362e+09	6.64368e+06	6.958	0.04903	30	0.00199893	0.00203	0.984696	-15.3036		4.03077	95.7782	0.191558	20.49	69.03	0.7566	0.0426	10.54	0	0.0087	0	0.0309	0.0301	0.0467	0
			Pattern1_ALBITE2@9	2014-07-22	16:24:00	-7714	2030	5.65e-09	6.15e-09	97	2	0	12	nd	nd	33934	5958	3.47867e+09	6.96061e+06	8.015	0.06436	30	0.00200094	0.00203	0.985685	-14.3151		1.47107	98.2151	0.314199	20.25	70.24	0.2703	0	10.58	0	0.0101	0.0253	0.0257	0.0484	0.0932	0
		Gstd0009	Pattern2_AN@1	2014-07-22	18:12:00	-9592	1786	6.92e-09	5.83e-09	74	20	0	32	nd	nd	33306	9055	2.35369e+09	4.68958e+06	2.661	0.0583	30	0.00199244	0.00201934	0.986681	-13.3195		96.671	3.25968	0.0694667	35.35	44.72	19.44	0.0061	0.3843	0.0656	0.0374	0.4815	0.0414	0.0117	0.1074	0
			Pattern2_AN@2	2014-07-22	18:16:00	-9718	1851	6.66e-09	5.81e-09	64	15	0	30	nd	nd	43351	9756	2.27702e+09	4.53656e+06	2.386	0.07737	30	0.00199232	0.00201934	0.986622	-13.378		96.4201	3.57991	0	35.42	44.9	19.58	0.0755	0.4262	0.0866	0	0.4474	0	0	0.0565	0
			Pattern2_AN@3	2014-07-22	18:20:00	-9814	1975	6.59e-09	5.79e-09	48	4	0	33	nd	nd	47118	9861	2.02965e+09	4.04673e+06	2.853	0.08712	30	0.0019938	0.00201934	0.987356	-12.644		97.4164	2.58364	0	35.61	44.7	19.68	0	0.306	0.0789	0.0402	0.4486	0.0311	0	0	0.0819
			Pattern2_AN@4	2014-07-22	18:24:00	-9901	2105	6.59e-09	5.74e-09	26	-6	0	31	nd	nd	44502	10122	1.84088e+09	3.67529e+06	3.877	0.09636	30	0.00199648	0.00201934	0.988683	-11.3168		96.7481	3.1158	0.136221	35.22	44.7	19.48	0	0.3678	0.0691	0.0129	0.4381	0	0.023	0.0795	0
			Pattern2_AN@5	2014-07-22	18:29:00	-9963	2440	6.55e-09	5.61e-09	-7	-29	0	36	nd	nd	35294	8166	1.42332e+09	2.84606e+06	5.323	0.101	30	0.00199959	0.00201934	0.990223	-9.77729		96.7831	3.19382	0.0232085	35.35	44.57	19.44	0.0244	0.3761	0.0313	0.0144	0.4917	0.1086	0.0039	0.109	0
			Pattern2_AN@6	2014-07-22	18:33:00	-9771	2440	6.68e-09	5.76e-09	37	-16	0	34	nd	nd	44293	10897	2.09029e+09	4.16711e+06	2.543	0.07357	30	0.00199356	0.00201934	0.987235	-12.7655		95.9547	4.04527	0	35.2	44.96	19.36	0	0.4785	0.1042	0.0129	0.4483	0.0931	0	0.0569	0
			Pattern2_AN@7	2014-07-22	18:37:00	-9804	2209	6.56e-09	5.76e-09	44	-6	0	26	nd	nd	47118	10667	2.10462e+09	4.19627e+06	2.756	0.07141	30	0.00199383	0.00201934	0.987371	-12.6295		96.4647	3.4592	0.0753313	35.4	44.91	19.64	0	0.4129	0.0892	0	0.5233	0.1035	0.013	0.0759	0
			Pattern2_AN@8	2014-07-22	18:41:00	-9932	2685	6.53e-09	5.51e-09	-16	-41	0	32	nd	nd	34562	7025	1.27818e+09	2.55668e+06	5.784	0.121	30	0.00200026	0.00201934	0.990551	-9.44861		96.7008	3.26141	0.0371731	35.42	44.58	19.82	0.0245	0.3919	0.0789	0	0.4276	0	0.0065	0.007	0
		Gstd0005	Pattern2_LAB2@1	2014-07-22	18:57:00	-2056	5682	6.64e-09	5.79e-09	-3	18	0	12	nd	nd	33516	8888	2.99102e+09	5.96291e+06	3.685	0.06377	30	0.0019936	0.00202024	0.986815	-13.1848		53.4304	44.0206	2.57063	28.1	56.29	10.6	0.0223	5.12	0.0081	0	0.3242	0.0361	0.4245	0.0161	0
			Pattern2_LAB2@02	2014-07-22	19:01:00	-2040	5929	6.64e-09	5.78e-09	-3	20	0	11	nd	nd	48583	10102	2.98745e+09	5.95432e+06	3.236	0.05222	30	0.00199311	0.00202024	0.986572	-13.4277		53.3247	44.1811	2.47924	28.27	56.06	10.87	0.0773	5.28	0.0191	0	0.3055	0.0774	0.4268	0.1174	0
			Pattern2_LAB2@03	2014-07-22	19:05:00	-1836	5893	6.59e-09	5.78e-09	-1	20	0	9	nd	nd	44397	9380	2.98884e+09	5.9574e+06	3.411	0.06151	30	0.00199322	0.00202024	0.986624	-13.3758		53.5071	43.8357	2.67387	28.32	56.35	10.66	0.0591	5.12	0.0065	0	0.2738	0.0361	0.4444	0.0787	0
			Pattern2_LAB2@04	2014-07-22	19:10:00	-1869	5587	6.62e-09	5.78e-09	-2	16	0	10	nd	nd	44502	9704	2.98352e+09	5.94828e+06	3.565	0.05227	30	0.00199371	0.00202024	0.98687	-13.1299		53.5065	42.924	3.57047	28.16	55.99	10.78	0.0143	5.07	0.0134	0.0158	0.2897	0.0361	0.6037	0.0457	0
			Pattern2_LAB2@05	2014-07-22	19:14:00	-1731	5753	6.56e-09	5.76e-09	-1	18	0	8	nd	nd	45653	9693	2.98889e+09	5.95938e+06	3.676	0.05135	30	0.00199385	0.00202024	0.986937	-13.0633		53.9887	43.2513	2.76029	28.26	56.08	10.88	0.0285	5.11	0	0.013	0.2817	0.0103	0.4669	0.1608	0
			Pattern2_LAB2@06	2014-07-22	19:18:00	-483	5914	6.56e-09	5.76e-09	4	20	0	5	nd	nd	48164	10007	2.97364e+09	5.92469e+06	2.889	0.05521	30	0.00199241	0.00202024	0.986223	-13.7768		54.273	43.1378	2.61635	28.37	56.05	10.73	0.0875	5	0	0.0043	0.27	0	0.4297	0.0404	0
			Pattern2_LAB2@07	2014-07-22	19:22:00	-250	5878	6.42e-09	5.78e-09	4	18	0	9	nd	nd	46908	9798	3.0095e+09	5.99966e+06	3.532	0.06389	30	0.00199357	0.00202024	0.986801	-13.1991		55.5375	41.8818	2.60971	27.93	55.61	10.97	0	4.85	0	0	0.3005	0.0259	0.4279	0.087	0
			Pattern2_LAB2@08	2014-07-22	19:26:00	-176	5658	6.53e-09	5.82e-09	4	17	0	6	nd	nd	43874	9421	3.01485e+09	6.00662e+06	2.978	0.07293	30	0.00199235	0.00202024	0.986193	-13.8073		53.4179	44.2102	2.36569	28.3	56.26	10.82	0.0468	5.25	0.0141	0.023	0.3056	0.0619	0.4033	0.0483	0
			Pattern2_LAB2@09	2014-07-22	19:30:00	-457	5635	6.55e-09	5.86e-09	-2	16	0	9	nd	nd	43037	7726	3.00737e+09	5.99057e+06	3.029	0.0431	30	0.00199196	0.00202024	0.986002	-13.998		53.97	43.4666	2.57594	28.21	56.41	10.78	0.0061	5.09	0	0	0.258	0	0.4298	0.0217	0
			Pattern2_LAB2@10	2014-07-22	19:34:00	-346	5782	6.55e-09	5.88e-09	-4	16	0	8	nd	nd	43246	6094	3.03167e+09	6.04045e+06	3.592	0.06198	30	0.00199245	0.00202024	0.986245	-13.7546		54.3418	42.9583	2.72285	28.2063	56.155	11.12	0.0348625	5.0525	0.006125	0.0041375	0.27835	0.0283875	0.454813	0.0907375	0
			Pattern2_LAB2@11	2014-07-22	19:38:00	1831	5995	6.42e-09	5.89e-09	9	17	0	3	nd	nd	47432	6638	3.02982e+09	6.03694e+06	3.534	0.06851	30	0.00199251	0.00202024	0.986275	-13.7249		54.7398	42.755	2.53333	28.13	56.11	10.81	0	4.95	0.0183	0.0374	0.3082	0.0774	0.4153	0.0248	0
			Pattern2_LAB2@12	2014-07-22	19:43:00	1868	6226	6.42e-09	5.9e-09	12	16	0	19	nd	nd	52768	7266	3.03674e+09	6.04833e+06	3.032	0.06122	30	0.00199172	0.00202024	0.985881	-14.1187		54.1968	43.5331	2.28078	28	56.2	10.83	0.0285	5.1	0.0072	0	0.2381	0	0.3808	0.0752	0
			Pattern2_LAB2@13	2014-07-22	19:47:00	1319	5936	6.28e-09	5.9e-09	7	19	0	14	nd	nd	54023	8637	3.04811e+09	6.07272e+06	3.1	0.07577	30	0.00199229	0.00202024	0.986166	-13.8339		54.3209	43.0591	2.66223	28.02	56.58	10.63	0	4.94	0.01	0	0.2686	0	0.4304	0.1611	0
			Pattern2_LAB2@14	2014-07-22	19:51:00	1318	5728	5.9e-09	5.89e-09	8	16	0	15	nd	nd	55174	8396	3.04399e+09	6.06494e+06	3.209	0.06852	30	0.00199243	0.00202024	0.986235	-13.765		54.2925	43.2623	2.46157	28.32	56.52	10.81	0.0122	5.05	0	0	0.237	0.0413	0.4087	0.0348	0
			Pattern2_LAB2@15	2014-07-22	19:55:00	1750	5658	5.72e-09	5.88e-09	9	15	0	13	nd	nd	52245	8856	3.04045e+09	6058397	3.214	0.06019	30	0.0019926	0.00202024	0.986317	-13.6828		54.3377	43.2753	2.39557	28.24	56.23	10.88	0	5.08	0	0	0.2738	0.0206	0.4012	0.093	0
		Gstd0006	Pattern2_LAB1@2	2014-07-23	09:57:00	2274	-3478	6.55e-09	5.75e-09	39	29	0	50	nd	nd	47955	9380	2.92286e+09	5.81277e+06	1.112	0.05102	30	0.00198873	0.0020199	0.984565	-15.4347		59.638	39.0864	1.27564	29.99	53.58	12.18	0.0163	4.68	0	0	0.2472	0.1548	0.2187	0.1998	0
			Pattern2_LAB1@3	2014-07-23	10:02:00	2570	-3414	6.33e-09	5.76e-09	42	30	0	47	nd	nd	45757	9128	2.92415e+09	5.81483e+06	1.069	0.06089	30	0.00198856	0.0020199	0.98448	-15.52		61.9127	36.6918	1.39555	29.7	53.15	12.52	0	4.35	0	0.0072	0.8137	0.067	0.2369	0.0109	0.0808
			Pattern2_LAB1@4	2014-07-23	10:06:00	1661	-4498	6.2e-09	5.78e-09	37	13	0	44	nd	nd	46385	8867	2.97965e+09	5.93078e+06	2.086	0.0514	30	0.00199043	0.0020199	0.985407	-14.593		63.9435	34.9843	1.07217	30.25	53.43	13.25	0.0326	4.25	0.0319	0.0187	0.1852	0.0672	0.1865	0.0114	0
			Pattern2_LAB1@5	2014-07-23	10:10:00	1734	-4279	6.22e-09	5.79e-09	40	16	0	40	nd	nd	45862	9463	2.94949e+09	5.86851e+06	1.586	0.05429	30	0.00198967	0.0020199	0.985031	-14.9694		62.5906	36.0097	1.39972	29.96	53.88	12.63	0	4.26	0	0.0216	0.1666	0.0827	0.2371	0	0
			Pattern2_LAB1@6	2014-07-23	10:14:00	1834	-4493	6.26e-09	5.8e-09	40	14	0	38	nd	nd	46385	9693	2.96744e+09	5.90624e+06	1.9	0.0581	30	0.00199035	0.0020199	0.985368	-14.6317		63.0134	35.9397	1.04691	30.04	53.46	12.77	0.0224	4.27	0.0058	0	0.4017	0	0.1781	0.0043	0
			Pattern2_LAB1@7	2014-07-23	10:18:00	2402	-4493	6.3e-09	5.81e-09	44	16	0	37	nd	nd	46176	9463	2916579908	5.80242e+06	1.425	0.05276	30	0.00198946	0.0020199	0.984927	-15.0728		64.9273	33.9983	1.07437	30.42	53.12	13.16	0.0386	4.04	0	0	0.0844	0	0.1828	0	0
			Pattern2_LAB1@8	2014-07-23	10:22:00	2222	-4562	6.37e-09	5.81e-09	43	14	0	35	nd	nd	46699	9934	2.92036e+09	5.81044e+06	1.469	0.05752	30	0.00198963	0.0020199	0.985012	-14.9883		63.2906	35.5093	1.20011	30.19	53.48	12.86	0.1405	4.23	0.0415	0	0.2063	0.0413	0.2047	0.0035	0
			Pattern2_LAB1@9	2014-07-23	10:26:00	2314	-4341	6.46e-09	5.81e-09	43	15	0	33	nd	nd	47013	8961	2.93091e+09	5.83182e+06	1.712	0.06416	30	0.00198977	0.0020199	0.985079	-14.9205		62.7285	36.0328	1.23872	29.93	53.62	12.62	0	4.25	0.0427	0	0.3675	0.0774	0.2092	0.0651	0
		Gstd0003	TCCOL1_OLIG@1	2014-07-23	16:36:00	-8737	4119	6.08e-09	5.7e-09	-21	-18	0	44	nd	nd	32155	9369	2.77577e+09	5.51929e+06	0.85	0.05581	30	0.00198838	0.00202164	0.983548	-16.4517		21.5137	75.9599	2.51471	23.59	64.09	4.43	0	9.17	0.0123	0	0.0692	0	0.4367	0.0842	0
			TCCOL1_OLIG@2	2014-07-23	16:40:00	-8622	4234	5.96e-09	5.7e-09	-20	-17	0	39	nd	nd	42200	8647	2.75544e+09	5.48166e+06	1.484	0.0561	30	0.0019894	0.00202164	0.984049	-15.9506		21.9164	75.5271	2.55616	23.53	64.61	4.42	0	8.93	0	0	0.0538	0.0398	0.4328	0.0629	0
			TCCOL1_OLIG@3	2014-07-23	16:44:00	-8579	4047	5.83e-09	5.7e-09	-13	-11	0	32	nd	nd	47536	10102	2842843496	5.65267e+06	0.766	0.05438	30	0.00198839	0.00202164	0.98355	-16.4504		21.3758	76.1436	2.48173	23.37	64.33	4.3	0.0451	8.98	0.004	0.0139	0.0371	0.0199	0.4189	0.1399	0
			TCCOL1_OLIG@13	2014-07-23	17:26:00	-8652	4181	5.41e-09	5.67e-09	-13	-15	0	29	nd	nd	45967	9055	2.67369e+09	5.31789e+06	1.147	0.06162	30	0.00198897	0.00202164	0.98384	-16.1601		21.5153	76.0248	2.44367	23.09	64.03	4.47	0	9.26	0	0	0.0514	0.0349	0.429	0.063	0.0495
			TCCOL1_OLIG@14	2014-07-23	17:30:00	-8534	4125	5.43e-09	5.7e-09	-11	-10	0	25	nd	nd	48164	10489	2.87942e+09	5.72834e+06	1.24	0.05691	30	0.00198941	0.00202164	0.984057	-15.9425		21.2487	76.2634	2.48335	23.59	64.44	4.32	0.0255	9.09	0.0069	0.0209	0.0769	0.0099	0.4246	0.0913	0
			TCCOL1_OLIG@15	2014-07-23	17:34:00	-8685	4054	5.22e-09	5.74e-09	-13	-10	0	24	nd	nd	47536	9212	2.82544e+09	5.61737e+06	0.792	0.05426	30	0.00198814	0.00202164	0.98343	-16.5703		21.8152	75.4354	2.74898	23.47	64.39	4.4	0	8.92	0.0309	0	0.0794	0.0597	0.4655	0.1034	0.0959
			TCBOA12_Olig@1	2014-07-24	13:35:00	-2004	6532	6.64e-09	5.98e-09	16	41	0	31	nd	nd	50361	12445	3.16415e+09	6.2888e+06	0.135	0.05775	30	0.00198752	0.00202164	0.983119	-16.8807		21.6236	75.9897	2.37246	23.38	64	4.48	0	9.23	0	0	0.0359	0	0.4151	0.0321	0
			TCBOA12_Olig@2	2014-07-24	13:40:00	-1936	6610	6.53e-09	5.97e-09	17	42	0	27	nd	nd	60406	13356	3.17132e+09	6.30561e+06	0.405	0.06678	30	0.00198832	0.00202164	0.983518	-16.4816		21.3322	76.4773	2.17752	23.46	63.73	4.42	0.0393	9.29	0	0	0.0372	0.0846	0.381	0.0618	0
			TCBOA12_Olig@3	2014-07-24	13:44:00	-2032	6591	6.55e-09	5.96e-09	16	40	0	27	nd	nd	59569	13125	3.18105e+09	6.32603e+06	0.616	0.05982	30	0.00198866	0.00202164	0.983684	-16.3162		21.6918	75.9995	2.30104	23.44	63.87	4.44	0	9.12	0.0044	0	0.0628	0.0797	0.3967	0.1393	0.0192
			TCBOA12_Olig@16	2014-07-24	14:37:00	-2000	6651	5.98e-09	6.26e-09	12	41	0	14	nd	nd	66893	11284	3.31562e+09	6.59429e+06	1.084	0.04685	30	0.00198886	0.00202164	0.983783	-16.2169		20.5751	76.9935	2.42139	23.54	63.95	4.23	0	9.28	0	0	0.0757	0.0548	0.4196	0	0
			TCBOA12_Olig@17	2014-07-24	14:41:00	-2060	6663	5.98e-09	6.23e-09	14	41	0	11	nd	nd	70764	11954	3.31732e+09	6.59972e+06	1.292	0.04996	30	0.00198947	0.00202164	0.984086	-15.9143		20.928	76.5798	2.48128	23.5133	64.1883	4.13	0.0108	9.08667	0.00908333	0.00348333	0.0632167	0.0456167	0.422883	0.0904833	0.0191833
			TCBOA12_Olig@18	2014-07-24	14:45:00	-1856	6745	6.12e-09	6.2e-09	18	42	0	11	nd	nd	69927	12246	3.28253e+09	6.52921e+06	1.03	0.04655	30	0.00198908	0.00202164	0.983892	-16.1084		21.4577	76.3333	2.19649	23.42	63.4	4.44	0	9.26	0.0255	0.0293	0.0461	0	0.3837	0.1257	0.0192
		Gstd0004	CHR50_ANDE@1	2014-07-24	16:58:00	-1231	-4926	9.9e-09	5.95e-09	-2	6	0	21	nd	nd	48896	11483	3.16483e+09	6.30295e+06	2.358	0.04429	30	0.00199156	0.00202024	0.985803	-14.1968		50.9967	46.2915	2.77919	26.78	56.48	9.79	0.0305	5.21	0.0587	0.0403	0.3627	0.0361	0.437	0.1401	0
			CHR50_ANDE@2	2014-07-24	17:02:00	-1099	-4875	9.34e-09	5.95e-09	0	4	0	21	nd	nd	55384	11284	3.15364e+09	6.28322e+06	2.764	0.06231	30	0.00199237	0.00202024	0.986206	-13.794		51.1457	45.8874	3.04224	26.72	56.66	9.81	0.1057	5.16	0.0943	0.0014	0.34	0	0.4777	0.1777	0
			CHR50_ANDE@3	2014-07-24	17:06:00	-1201	-4789	9.34e-09	5.93e-09	-1	5	0	20	nd	nd	57267	11378	3.14067e+09	6.25343e+06	2.109	0.05027	30	0.00199112	0.00202024	0.985584	-14.4158		50.5341	46.5781	2.96519	26.77	56.3	9.66	0	5.22	0.0662	0	0.4153	0.1391	0.4634	0.1549	0
			CHR50_ANDE@12	2014-07-24	17:43:00	-1296	-4824	9.03e-09	5.93e-09	0	3	0	10	nd	nd	54442	11211	3.14137e+09	6.25711e+06	2.501	0.06047	30	0.00199184	0.00202024	0.985943	-14.0568		50.7793	46.8186	2.43169	27.02	56.46	9.99	0.0691	5.4	0.0855	0.0331	0.4235	0.031	0.3967	0.1338	0
			CHR50_ANDE@13	2014-07-24	17:47:00	-1276	-4688	8.72e-09	5.95e-09	0	2	0	11	nd	nd	58418	10991	3.15541e+09	6.28282e+06	2.185	0.04805	30	0.00199113	0.00202024	0.985589	-14.411		51.2505	45.9122	2.89619	26.51	56.08	9.92	0	5.21	0.0935	0.0302	0.4022	0	0.461	0.0971	0
			CHR50_ANDE@14	2014-07-24	17:52:00	-1063	-4800	8.56e-09	5.96e-09	3	1	0	9	nd	nd	52454	10070	3.16871e+09	6.31655e+06	3.492	0.06176	30	0.00199342	0.00202024	0.986723	-13.2769		50.6834	46.4225	2.94462	26.57	56.37	9.87	0.0936	5.3	0.0555	0.0043	0.34	0.0155	0.4731	0.1608	0
			CHR10_ANDE@86	2014-07-25	02:15:00	-2108	7904	6.9e-09	6.09e-09	17	85	0	-4	nd	nd	35644	5763	3.2635e+09	6.50111e+06	3.519	0.05446	30	0.00199207	0.00202024	0.986055	-13.9445		48.0684	49.2621	2.67197	27.44	57.2	9.67	0.0809	5.81	0.0636	0.0307	0.362	0.05	0.4508	0.1669	0
			CHR10_ANDE@87	2014-07-25	02:19:00	-2148	7936	6.81e-09	6.11e-09	14	85	0	0	nd	nd	39053	4463	3.28985e+09	6.55929e+06	4.598	0.06663	30	0.0019938	0.00202024	0.986912	-13.0882		49.2396	47.7747	2.99238	27.22	56.99	9.88	0.071	5.62	0.0585	0	0.3519	0	0.5029	0.0265	0
			CHR10_ANDE@88	2014-07-25	02:23:00	-2160	7852	6.79e-09	6.09e-09	16	80	0	1	nd	nd	41363	6345	3.25113e+09	6.47473e+06	3.155	0.06015	30	0.00199153	0.00202024	0.985789	-14.2107		49.1917	48.0341	2.8197	27.5	57.05	9.59	0.0533	5.49	0.0866	0.0112	0.3493	0.015	0.454	0.0424	0
			CHR10_ANDE@99	2014-07-25	03:09:00	-2174	7882	6.83e-09	5.76e-09	21	82	0	-2	nd	nd	40119	8661	3.12278e+09	6.225e+06	3.691	0.06397	30	0.00199341	0.00202024	0.986722	-13.278		49.2667	47.9829	2.76973	27.49	57.25	9.79	0.0138	5.59	0.0482	0.0056	0.3724	0.1351	0.4588	0	0
			CHR10_ANDE@100	2014-07-25	03:13:00	-2165	7965	6.66e-09	5.73e-09	17	86	0	-3	nd	nd	40212	8898	3.13085e+09	6.2461e+06	4.463	0.056	30	0.00199501	0.00202024	0.987514	-12.4861		47.7862	49.4787	2.72989	27.39	56.97	9.67	0.1046	5.87	0.1004	0.0112	0.3826	0.02	0.4646	0.1007	0.0028
			CHR10_ANDE@101	2014-07-25	03:17:00	-2093	7953	6.66e-09	5.73e-09	20	80	0	-2	nd	nd	44083	9108	3.08803e+09	6.15659e+06	3.743	0.07734	30	0.00199369	0.00202024	0.986859	-13.1406		48.3374	48.8844	2.80082	27.4	57.02	9.58	0.0533	5.68	0.1108	0	0.393	0.02	0.4622	0.0716	0
		Gstd0003	MOR59_OLIG@23	2014-07-25	11:25:00	-6517	7624	7.72e-09	6.02e-09	-52	11	0	39	nd	nd	49281	8363	2.9164e+09	5.804e+06	1.989	0.06272	30	0.00199013	0.00202164	0.984411	-15.5894		21.6058	75.8589	2.54479	23.13	63.66	4.28	0	8.81	0	0	0.0513	0	0.4216	0.1328	0
			MOR59_OLIG@24	2014-07-25	11:29:00	-6677	7505	7.36e-09	5.99e-09	-54	33	0	26	nd	nd	45659	7255	2.85753e+09	5.68266e+06	1.417	0.07257	30	0.00198866	0.00202164	0.983688	-16.3123		21.5524	75.9636	2.48085	22.97	64.1	4.37	0	9.03	0.0009	0.0098	0.0948	0.005	0.4228	0.1148	0
			MOR59_OLIG@25	2014-07-25	11:33:00	-6535	7772	7.36e-09	5.99e-09	-49	3	0	45	nd	nd	53542	8980	2.87031e+09	5.71426e+06	2.204	0.06216	30	0.00199081	0.00202164	0.98475	-15.2499		21.909	75.6035	2.49823	22.95	63.99	4.33	0	8.76	0	0.0334	0.032	0.1194	0.4127	0.0537	0
			MOR59_OLIG@32	2014-07-25	12:02:00	-6606	7733	7.12e-09	5.85e-09	-47	5	0	41	nd	nd	49068	10525	2.76926e+09	5.51178e+06	1.684	0.05584	30	0.00199034	0.00202164	0.984517	-15.4826		21.4144	76.3191	2.27398	22.96	63.87	4.25	0	8.88	0	0	0.0679	0	0.3776	0.0508	0
			MOR59_OLIG@33	2014-07-25	12:06:00	-6474	7857	7.16e-09	5.85e-09	-43	2	0	48	nd	nd	49600	9588	2.74993e+09	5.47594e+06	2.269	0.06108	30	0.0019913	0.00202164	0.98499	-15.0102		21.6133	75.9152	2.46738	23.31	64.14	4.39	0.0334	9.04	0.0311	0	0.073	0.0796	0.4214	0.0533	0
			MOR59_OLIG@34	2014-07-25	12:10:00	-6741	7616	7.18e-09	5.85e-09	-46	12	0	34	nd	nd	48002	10270	2.85103e+09	5.67577e+06	1.95	0.06632	30	0.00199078	0.00202164	0.984734	-15.2658		21.8781	76.169	1.9558	22.99	63.62	4.38	0.0019	8.94	0	0	0.0294	0	0.3282	0.0845	0
			MOR61_Olig@1	2014-07-25	14:08:00	5384	5736	6.66e-09	5.92e-09	87	-41	0	35	nd	nd	50879	5252	3.17555e+09	6.32816e+06	3.938	0.04369	30	0.00199278	0.00202164	0.985722	-14.2776		22.7853	75.3063	1.91826	23.36	64.14	4.49	0	8.7	0.0012	0	0.0563	0	0.3157	0.1027	0
			MOR61_Olig@2	2014-07-25	14:13:00	5425	5818	6.74e-09	5.91e-09	90	-43	0	32	nd	nd	33194	5838	3.17083e+09	6.32082e+06	4.165	0.06007	30	0.00199343	0.00202164	0.986043	-13.9567		25.5939	72.5261	1.89593	23.73	63.41	4.99	0.0097	8.29	0.0212	0.007	0.0282	0	0.3077	0.0674	0
			MOR61_Olig@3	2014-07-25	14:17:00	5506	5597	6.72e-09	5.89e-09	87	-40	0	32	nd	nd	33295	6310	3.18665e+09	6.35496e+06	4.506	0.06165	30	0.00199424	0.00202164	0.986446	-13.5541		21.8969	76.7016	1.41018	23.44	64.38	4.29	0.0589	8.81	0.0025	0	0.0641	0.0099	0.2305	0	0
			MOR61_Olig@12	2014-07-25	14:54:00	5382	5675	6.18e-09	5.83e-09	87	-41	0	28	nd	nd	32235	6317	3.1454e+09	6.27034e+06	4.115	0.05141	30	0.00199349	0.00202164	0.986077	-13.9232		26.9753	71.3186	1.70927	24.25	63.38	5.4	0.0019	8.37	0	0	0.0295	0.0199	0.2867	0.0493	0
			MOR61_Olig@13	2014-07-25	14:58:00	5516	5515	6.3e-09	5.82e-09	87	-39	0	26	nd	nd	33301	6573	3.14635e+09	6.27518e+06	4.545	0.05342	30	0.00199443	0.00202164	0.986538	-13.4619		21.9435	76.8192	1.23938	23.29	64.03	4.39	0	9.01	0.0237	0.0112	0.0448	0	0.2078	0.0413	0
			MOR61_Olig@14	2014-07-25	15:02:00	5402	5545	6.14e-09	5.8e-09	85	-36	0	26	nd	nd	34366	6562	3.16676e+09	6.31166e+06	3.882	0.05589	30	0.0019931	0.00202164	0.985879	-14.1205		22.6206	75.7808	1.60739	23.07	63.14	4.45	0	8.74	0	0.0028	0.0205	0	0.264	0.0696	0
		Gstd0009	AN-Std@1	2014-07-25	17:24:00	1512	1242	5.68e-09	5.77e-09	29	15	0	20	nd	nd	44167	10887	2.98845e+09	5.95787e+06	3.365	0.06619	30	0.00199363	0.00201934	0.987272	-12.7282		96.6304	3.31254	0.0568093	35.36	44.73	19.3836	0.02175	0.3932	0.0701167	0.0107833	0.468267	0.04225	0.00968333	0.07255	0
			AN-Std@2	2014-07-25	17:28:00	1415	900	5.66e-09	5.78e-09	25	20	0	18	nd	nd	57484	10397	2.97642e+09	5.93015e+06	2.81	0.06864	30	0.00199237	0.00201934	0.986648	-13.3524		96.7062	3.26722	0.0266524	35.395	44.74	19.5273	0.00765	0.390175	0.0819	0.022625	0.4515	0.0414	0.00455	0.042825	0
			AN-Std@3	2014-07-25	17:32:00	1815	901	5.61e-09	5.79e-09	21	15	0	18	nd	nd	58360	11420	2.96322e+09	5.90103e+06	2.151	0.05757	30	0.00199143	0.00201934	0.986179	-13.8213		96.6265	3.35626	0.0172907	35.395	44.82	19.4992	0.0204	0.39875	0.083825	0.022625	0.45645	0.0414	0.002925	0.0552	0.020475
			AN-Std@4	2014-07-25	17:37:00	2186	1047	5.63e-09	5.81e-09	19	12	0	18	nd	nd	56845	11484	2.96754e+09	5.91107e+06	2.387	0.06077	30	0.00199191	0.00201934	0.986418	-13.5815		96.7105	3.26353	0.0259708	35.386	44.706	19.4696	0.011	0.38736	0.07178	0.02098	0.45954	0.05484	0.00442	0.05606	0
			AN-Std@5	2014-07-25	17:41:00	2614	1473	5.75e-09	5.81e-09	16	10	0	20	nd	nd	57377	10802	2.98656e+09	5.95065e+06	2.799	0.06644	30	0.00199248	0.00201934	0.986699	-13.3014		96.6537	3.30331	0.0430463	35.3672	44.77	19.5027	0.0150444	0.392797	0.075213	0.0168009	0.466519	0.0512611	0.00731481	0.0667306	0.0091
			AN-Std@6	2014-07-25	17:45:00	2988	1462	5.66e-09	5.8e-09	16	9	0	21	nd	nd	56951	10536	2.9665e+09	5.90819e+06	2.409	0.06913	30	0.00199164	0.00201934	0.986283	-13.7166		96.5006	3.46475	0.0348646	35.3537	44.7975	19.5661	0.0080375	0.418369	0.08855	0.00888125	0.462675	0.0595	0.0060125	0.0456563	0
			AN-Std@7	2014-07-25	17:49:00	2809	1121	5.61e-09	5.8e-09	15	12	0	18	nd	nd	55973	10682	2.96955e+09	5.91462e+06	2.446	0.07216	30	0.00199176	0.00201934	0.986342	-13.6582		96.5399	3.42215	0.0378682	35.3432	44.7392	19.4114	0.01267	0.407052	0.0781193	0.0164127	0.457041	0.046318	0.00646067	0.059982	0
			AN-Std@8	2014-07-25	17:53:00	2834	789	5.63e-09	5.81e-09	14	13	0	17	nd	nd	57600	10509	2.967e+09	5.90928e+06	2.428	0.06096	30	0.00199167	0.00201934	0.986297	-13.7031		96.6663	3.282	0.0516413	35.358	44.7394	19.4561	0.0121714	0.389469	0.0710317	0.0149019	0.469837	0.0559986	0.00878262	0.0701479	0.002925
			AN-Std@9	2014-07-25	17:57:00	2540	504	5.43e-09	5.81e-09	15	14	0	16	nd	nd	56841	10975	2.96902e+09	5.91563e+06	2.748	0.05262	30	0.00199245	0.00201934	0.986687	-13.3127		96.7784	3.19638	0.0251909	35.4767	44.8367	19.4475	0.0251667	0.3817	0.0849	0.0134	0.4731	0.0448667	0.00433333	0.0441333	0.0273
			AN-Std@10	2014-07-25	18:01:00	2309	-250	5.47e-09	5.79e-09	13	14	0	18	nd	nd	57926	11323	2971183087	5.91842e+06	2.432	0.05278	30	0.00199194	0.00201934	0.986434	-13.5663		96.7032	3.25979	0.0371408	35.3614	44.7457	19.5388	0.0106	0.387218	0.0741917	0.0194905	0.45756	0.0511214	0.00629405	0.059425	0.014625

## Sheet: 2.K-feldspar SIMS+EPMA data 
	SIMS and EPMA data of K-feldspar standards		SIMS DATA→																								EPMA DATA→
			Centre de Recherches Pétrographiques et Géochimiques, Nancy. Cameca IMF 1280 HR.																								Centres Científics i Tecnològics de la Universitat de Barcelona. Jeol JXA-8230.
							Chamber	Primary					Field	Offset					d18O ‰	Error ‰		SIMS	Fluorination	calculated	calculated		Feldspar composition			Oxide %
	Standard	Analysis	Date	Hour	X (µm)	Y (µm)	Pressure (Torr)	Intensity (A)	LT1 def X	LT1 def Y	CA def X	CA def Y	Drift	Drift	Bf_L'2	Bf_H1	16O	18O	VSMOW	VSMOW	nb cycles	18O /16O	18O /16O	IMF	IMF (‰)		An	Ab	Or	Al2O3	SiO2	CaO	TiO2	Na2O	MgO	MnO	FeO	BaO	K2O	SrO	Rb2O
	Gstd0010	Pattern1_ALBITE1@1	2014-07-22	12:38:00	-1700	-5959	7.59e-09	5.93e-09	23	-17	0	33	nd	nd	52035	12864	3.3458e+09	6.66568e+06	2.566	0.08062	30	0.00199225	0.00202395	0.983828	-16.1725		8.70654	0	91.2935	18.39	64.1	0	0.049	1.0084	0	0	0.0559	0.6224	15.14	0.1663	0
		Pattern1_ALBITE1@2	2014-07-22	12:42:00	-1607	-5923	7.4e-09	5.93e-09	25	-16	0	29	nd	nd	58104	12843	3.40487e+09	6.79177e+06	3.85	0.0698	30	0.00199472	0.00202395	0.985046	-14.9537		10.7627	0	89.2373	18.59	64.88	0	0.0314	1.2281	0	0.0527	0	0.7712	14.58	0.2044	0
		Pattern1_ALBITE1@3	2014-07-22	12:46:00	-1500	-5893	7.36e-09	5.93e-09	28	-17	0	30	nd	nd	54651	12655	3.42365e+09	6.83471e+06	4.696	0.07164	30	0.00199632	0.00202395	0.985839	-14.1614		11.0564	0	88.9436	18.67	64.75	0	0.0039	1.2597	0	0	0.0216	0.7072	14.51	0.1855	0
		Pattern1_ALBITE1@4	2014-07-22	12:50:00	-3447	-5178	7.29e-09	5.93e-09	14	25	0	23	nd	nd	44397	9097	3.34441e+09	6.66863e+06	3.995	0.06098	30	0.00199396	0.00202395	0.984672	-15.3278		10.0618	0	89.9382	18.66	64.44	0	0	1.1509	0	0	0	0.821	14.73	0.1611	0
		Pattern1_ALBITE1@5	2014-07-22	12:54:00	-3649	-5260	7.12e-09	5.92e-09	13	24	0	22	nd	nd	44188	9662	3.34818e+09	6.67749e+06	4.115	0.05247	30	0.00199436	0.00202395	0.984872	-15.1285		9.59735	0	90.4026	18.51	64.07	0	0.0294	1.1077	0	0.0056	0.0063	0.6768	14.94	0.348	0
		Pattern1_ALBITE1@6	2014-07-22	12:58:00	-3328	-5230	7.04e-09	5.93e-09	18	23	0	20	nd	nd	46490	9421	3.32213e+09	6.62167e+06	3.555	0.06178	30	0.0019932	0.00202395	0.984298	-15.7023		9.62695	0	90.373	18.48	63.66	0	0	1.1152	0.0066	0.0236	0	0.7119	14.99	0.0864	0
		Pattern1_ALBITE1@7	2014-07-22	13:03:00	-2498	-5758	7.04e-09	5.95e-09	11	-5	0	23	nd	nd	57372	11681	3.34833e+09	6.67101e+06	2.791	0.05694	30	0.00199234	0.00202395	0.98387	-16.1305		9.45157	0	90.5484	18.58	64.29	0	0.0392	1.0585	0.0017	0	0.0076	0.9853	14.52	0.1744	0
		Pattern1_ALBITE1@8	2014-07-22	13:07:00	-2498	-5894	6.95e-09	5.98e-09	12	-10	0	23	nd	nd	58313	11169	3.37541e+09	6.72818e+06	3.364	0.04162	30	0.00199329	0.00202395	0.984341	-15.6585		10.0914	0	89.9086	18.73	63.55	0	0.0686	1.1429	0.0066	0.0194	0.0153	0.915	14.58	0.2526	0
		Pattern1_ALBITE1@9	2014-07-22	13:11:00	-2349	-5929	7.12e-09	5.99e-09	15	-11	0	22	nd	nd	60197	10405	3.3573e+09	6.69126e+06	3.346	0.06103	30	0.00199305	0.00202395	0.98422	-15.7801		8.72554	0	91.2745	18.4	63.76	0	0.0647	1.0028	0.0152	0.0374	0.0114	0.9895	15.02	0.2553	0
	Gstd0011	Pattern1_FK1@1	2014-07-22	14:37:00	-3639	7553	6.46e-09	6.06e-09	60	47	0	24	nd	nd	42200	11242	3.45266e+09	6.87503e+06	2.344	0.05568	30	0.00199123	0.0020237	0.983954	-16.0459		6.85291	0	93.1471	18.45	65.41	0	0.0183	0.8108	0	0.0086	0	0	15.78	0.0703	0
		Pattern1_FK1@2	2014-07-22	14:42:00	-3479	7541	6.61e-09	6.08e-09	59	49	0	20	nd	nd	51303	10960	3.48968e+09	6.9545e+06	3.204	0.04702	30	0.00199288	0.0020237	0.98477	-15.2304		5.54523	0	94.4548	18.44	64.78	0	0.0326	0.6552	0	0	0.0383	0.124	15.98	0.0547	0
		Pattern1_FK1@3	2014-07-22	14:46:00	-3384	7417	6.61e-09	6.08e-09	62	47	0	18	nd	nd	51198	11357	3.46181e+09	6.8944e+06	2.503	0.05043	30	0.00199156	0.0020237	0.984119	-15.8808		6.35167	0	93.6483	18.48	65.08	0	0.0611	0.747	0	0.0402	0.0435	0.0206	15.77	0.0485	0
		Pattern1_FK1@4	2014-07-22	14:50:00	-5903	7198	6.61e-09	6.07e-09	50	9	0	22	nd	nd	47850	10405	3.33502e+09	6.64304e+06	2.755	0.06279	30	0.0019919	0.0020237	0.984289	-15.711		5.5424	0	94.4576	18.3	64.55	0	0	0.6655	0	0.0201	0.0316	0.0465	16.24	0	0
		Pattern1_FK1@5	2014-07-22	14:54:00	-5724	7116	6.51e-09	6.02e-09	51	12	0	20	nd	nd	45339	10143	3.30068e+09	6.57149e+06	2.296	0.06551	30	0.00199095	0.0020237	0.983816	-16.1838		6.03627	0	93.9637	18.43	64.97	0	0	0.699	0	0.0172	0.0567	0.0621	15.58	0.0958	0
		Pattern1_FK1@6	2014-07-22	14:58:00	-5519	7072	6.55e-09	5.93e-09	50	11	0	24	nd	nd	46595	8658	3.2635e+09	6.49656e+06	2.369	0.07042	30	0.00199067	0.0020237	0.98368	-16.3202		5.43348	0	94.5665	18.38	64.97	0	0	0.6296	0	0.0086	0.0461	0.1292	15.69	0	0
		Pattern1_FK1@7	2014-07-22	15:02:00	-5449	8632	6.51e-09	5.81e-09	20	42	0	26	nd	nd	59150	11504	3.04663e+09	6.06294e+06	1.493	0.06583	30	0.00199005	0.0020237	0.983372	-16.6275		4.63904	0	95.361	18.13	65.05	0	0	0.5419	0	0	0.0449	0	15.95	0.0308	0
		Pattern1_FK1@8	2014-07-22	15:06:00	-5563	8599	6.83e-09	5.71e-09	14	38	0	23	nd	nd	60929	9327	3.01565e+09	6.00532e+06	2.512	0.05315	30	0.00199138	0.0020237	0.98403	-15.9695		5.95615	0	94.0438	18.36	65	0	0	0.694	0.0177	0.0129	0.029	0.0517	15.69	0	0.0094
		Pattern1_FK1@9	2014-07-22	15:10:00	-5449	8528	6.72e-09	5.69e-09	23	45	0	20	nd	nd	62708	8626	3.09858e+09	6.16553e+06	1.867	0.05799	30	0.00198979	0.0020237	0.983247	-16.7534		5.39756	0	94.6024	18.06	65.01	0	0.0326	0.6515	0.0076	0	0.0541	0	16.35	0.0587	0.0939
		TCSAU020_FK1@1	2014-07-23	11:39:00	-8538	126	6.85e-09	5.77e-09	14	31	0	38	nd	nd	55174	14161	3.31329e+09	6.59658e+06	1.694	0.06124	30	0.00199095	0.0020237	0.983816	-16.1844		8.04685	0	91.9531	18.47	66.25	0	0.0632	0.9522	0	0.0279	0.0831	0.0451	15.58	0.0676	0
		TCSAU020_FK1@2	2014-07-23	11:43:00	-8606	-18	6.74e-09	5.78e-09	13	31	0	33	nd	nd	64487	14611	3.34861e+09	6.67139e+06	2.326	0.07058	30	0.00199228	0.0020237	0.984477	-15.523		7.28259	0	92.7174	18.28	65.53	0	0	0.8585	0.0266	0	0	0.1152	15.65	0	0.0834
		TCSAU020_FK1@3	2014-07-23	11:47:00	-8656	67	6.53e-09	5.77e-09	15	34	0	29	nd	nd	66161	13921	3.34671e+09	6.66497e+06	2.031	0.05752	30	0.0019915	0.0020237	0.984087	-15.9128		7.86331	0	92.1367	18.4	66.36	0	0	0.9328	0	0	0.037	0.1202	15.65	0	0.0365
		TCSAU020_FK1@13	2014-07-23	12:28:00	-8434	107	6.18e-09	5.78e-09	21	25	0	17	nd	nd	62603	13136	3.34897e+09	6.67096e+06	2.375	0.05319	30	0.00199194	0.0020237	0.984308	-15.6922		9.02505	0	90.975	18.52	66.45	0	0	1.0538	0	0.0014	0.0268	0.0901	15.21	0	0.013
		TCSAU020_FK1@14	2014-07-23	12:32:00	-8393	29	5.96e-09	5.81e-09	18	27	0	16	nd	nd	62185	11556	3.35025e+09	6.67067e+06	2.187	0.04272	30	0.00199109	0.0020237	0.983889	-16.1106		7.02829	0	92.9717	18.2	66.07	0	0.0236	0.8252	0	0	0	0.0951	15.63	0.0025	0.0247
		TCSAU020_FK1@15	2014-07-23	12:36:00	-8509	-50	5.99e-09	5.85e-09	13	29	0	15	nd	nd	68253	11734	3.40471e+09	6.78089e+06	2.456	0.05069	30	0.00199162	0.0020237	0.98415	-15.8499		8.20076	0	91.7992	18.33	65.83	0	0.0079	0.9658	0	0.0153	0.0511	0.0451	15.48	0.0151	0
	Gstd0010	TCSAU020_AB1@16	2014-07-23	12:40:00	-3943	-5841	6.14e-09	5.86e-09	-37	-37	0	12	nd	nd	31737	2662	3.4515e+09	6.88038e+06	4.712	0.04664	30	0.00199344	0.00202395	0.984417	-15.5829		9.60745	0	90.3926	18.97	64.31	0	0	1.1513	0	0.0333	0.0013	1.0863	15.51	0.3843	0.0275
		TCSAU020_AB1@17	2014-07-23	12:44:00	-3767	-5906	6.3e-09	5.87e-09	-36	-42	0	13	nd	nd	31737	2306	3.46589e+09	6.91108e+06	5.059	0.04706	30	0.00199403	0.00202395	0.984704	-15.296		9.66424	0	90.3358	18.76	64.2	0	0	1.1282	0	0.0111	0	1.13	15.1	0.2254	0
		TCSAU020_AB1@18	2014-07-23	12:48:00	-3958	-6065	6.18e-09	5.87e-09	-40	-45	0	14	nd	nd	32888	2547	3.44682e+09	6.87008e+06	4.588	0.04905	30	0.00199317	0.00202395	0.984279	-15.7207		10.2204	0	89.7796	18.94	64.58	0	0	1.1711	0	0	0	0.9368	14.73	0.2734	0
		TCSAU020_AB1@30	2014-07-23	13:38:00	-3861	-5873	6.22e-09	5.83e-09	-29	-37	0	8	nd	nd	31318	5550	3.44623e+09	6.87252e+06	4.678	0.04308	30	0.00199422	0.00202395	0.984798	-15.2018		9.89013	0	90.1099	18.77	64.48	0	0.0354	1.1498	0	0	0.0166	1.1056	15	0.3097	0
		TCSAU020_AB1@31	2014-07-23	13:42:00	-3892	-6068	6.24e-09	5.82e-09	-33	-44	0	8	nd	nd	34562	4640	3.43707e+09	6.85555e+06	4.998	0.05221	30	0.00199459	0.00202395	0.984982	-15.018		9.1139	0	90.8861	18.89	64.37	0	0.0138	1.0337	0	0.0069	0	1.17	14.76	0.2048	0
		TCSAU020_AB1@32	2014-07-23	13:46:00	-3928	-6137	6.14e-09	5.82e-09	-33	-47	0	8	nd	nd	34980	5540	3.40194e+09	6.78056e+06	4.13	0.05158	30	0.00199315	0.00202395	0.984269	-15.7306		10.5768	0	89.4232	19.05	64.65	0	0.0118	1.1829	0.0017	0	0	1.21	14.32	0.1747	0
		TCBOA2_AB1@1	2014-07-23	20:21:00	-7504	5496	1.02e-08	5.69e-09	-74	-54	0	57	nd	nd	16461	5268	2.68229e+09	5.33458e+06	1.774	0.05815	30	0.00198882	0.00202395	0.982131	-17.8688		10.9191	0	89.0809	18.58	63.56	0	0.0235	1.2584	0	0	0.0458	0.8964	14.7	0.2409	0
		TCBOA2_AB1@2	2014-07-23	20:25:00	-7560	5606	9.34e-09	5.68e-09	-81	-61	0	55	nd	nd	25668	5561	2.55327e+09	5.08053e+06	2.17	0.05276	30	0.00198981	0.00202395	0.982622	-17.3778		11.0943	0	88.9057	18.54	64.18	0	0.0039	1.2785	0	0.0083	0.0141	0.9516	14.67	0.2255	0.0825
		TCBOA2_AB1@3	2014-07-23	20:29:00	-7444	5599	9.24e-09	5.69e-09	-69	-58	0	54	nd	nd	26610	5268	2.58081e+09	5.13034e+06	1.266	0.07415	30	0.00198788	0.00202395	0.981668	-18.3318		11.6094	0	88.3906	18.36	63.56	0	0	1.3374	0.0077	0.0291	0.0178	0.8671	14.58	0.328	0
		TCBOA2_AB1@39	2014-07-23	22:57:00	-7434	5492	8.9e-09	5.62e-09	-59	-52	0	24	nd	nd	28284	7329	2.72704e+09	5.42961e+06	2.53	0.05101	30	0.00199103	0.00202395	0.983225	-16.7752		11.1403	0	88.8597	18.46	63.93	0	0	1.2871	0.0137	0	0	0.8068	14.7	0.3827	0.0274
		TCBOA2_AB1@40	2014-07-23	23:01:00	-7471	5432	8.34e-09	5.61e-09	-61	-49	0	25	nd	nd	30272	6534	2.80418e+09	5.58689e+06	3.372	0.0739	30	0.00199234	0.00202395	0.983873	-16.1269		10.006	0	89.994	18.5	63.88	0	0	1.157	0.0173	0.0319	0.0076	0.9807	14.9	0.3715	0
		TCBOA2_AB1@41	2014-07-23	23:05:00	-7484	5570	7.99e-09	5.59e-09	-69	-55	0	28	nd	nd	29853	6931	2.74921e+09	5.4798e+06	3.721	0.07371	30	0.00199323	0.00202395	0.98431	-15.6903		10.8748	0	89.1252	18.56	64.01	0	0.0138	1.2416	0.0063	0.0208	0	0.902	14.57	0.2326	0
	Gstd0011	TCBOA2_FK1@42	2014-07-23	23:10:00	-19	7103	8.16e-09	5.6e-09	53	30	0	6	nd	nd	47536	12257	3.23824e+09	6.44944e+06	2.294	0.05507	30	0.00199165	0.0020237	0.984164	-15.8361		5.6327	0	94.3673	18.21	64.34	0	0.0335	0.6624	0.0088	0	0.0383	0.055	15.89	0.0461	0
		TCBOA2_FK1@43	2014-07-23	23:14:00	-3	7285	8.48e-09	5.63e-09	51	34	0	6	nd	nd	50257	12508	3.24213e+09	6.45784e+06	2.359	0.05134	30	0.00199185	0.0020237	0.984264	-15.7364		8.69743	0	91.3026	18.31	64.27	0	0.0296	1.0292	0	0	0.051	0.01	15.47	0	0
		TCBOA2_FK1@44	2014-07-23	23:18:00	-123	7324	8.67e-09	5.68e-09	49	34	0	8	nd	nd	51617	11797	3.22992e+09	6.42689e+06	1.429	0.06534	30	0.0019898	0.0020237	0.983249	-16.7507		7.09607	0	92.9039	18.33	64.43	0	0.0296	0.8391	0	0.0014	0.0357	0.06	15.73	0	0.0182
		TCBOA2_FK1@45	2014-07-23	23:22:00	-53	7369	8.58e-09	5.72e-09	47	33	0	6	nd	nd	54651	10258	3.30928e+09	6.58967e+06	2.45	0.05911	30	0.00199127	0.0020237	0.983976	-16.0238		6.37	0	93.63	18.42	64.28	0	0.02	0.75	0	0	0.03	0.05	15.84	0.01	0
		TCBOA2_FK1@46	2014-07-23	23:26:00	-236	7249	8.46e-09	5.74e-09	43	32	0	5	nd	nd	58732	9631	3.28553e+09	6.53917e+06	2.042	0.05985	30	0.00199029	0.0020237	0.983492	-16.5078		5.62499	0	94.375	18.46	64.22	0	0	0.6502	0	0.0097	0.0102	0.1	15.62	0.0151	0
		TCBOA2_FK1@67	2014-07-24	00:52:00	-60	7296	8.2e-09	5.7e-09	49	31	0	7	nd	nd	58209	10991	3.29041e+09	6.55529e+06	2.819	0.05604	30	0.00199224	0.0020237	0.984456	-15.5439		6.21	0	93.79	18.27	64.37	0	0	0.73	0.01	0	0.02	0.01	15.87	0	0.01
		TCBOA2_FK1@68	2014-07-24	00:56:00	-130	7375	8.2e-09	5.68e-09	48	32	0	3	nd	nd	57581	11954	3.28665e+09	6.54834e+06	2.75	0.05504	30	0.0019924	0.0020237	0.984535	-15.4647		6.51	0	93.49	18.34	64.51	0	0.03	0.77	0	0.01	0.04	0.06	15.81	0.01	0
		TCBOA2_FK1@69	2014-07-24	01:01:00	-207	7442	8.16e-09	5.67e-09	46	33	0	9	nd	nd	61871	12749	3.25261e+09	6.47879e+06	2.342	0.05743	30	0.00199187	0.0020237	0.984274	-15.7259		6.79092	0	93.2091	18.18	64.55	0	0.0217	0.7953	0.0042	0	0.0472	0.035	15.63	0	0
		TCBOA2_FK1@70	2014-07-24	01:05:00	-360	7350	8.16e-09	5.66e-09	46	33	0	6	nd	nd	60197	12403	3.20376e+09	6379510	2.055	0.05642	30	0.00199126	0.0020237	0.983969	-16.0308		6.38394	0	93.6161	18.12	63.63	0	0	0.7401	0.0123	0.0166	0.0153	0.0747	15.54	0.0499	0.0272
		TCCOL1_FK1@32	2014-07-24	11:53:00	4050	7896	5.7e-09	6.04e-09	43	53	0	18	nd	nd	49106	12330	3.38577e+09	6.74037e+06	1.934	0.05238	30	0.0019908	0.0020237	0.983741	-16.2585		7.41557	0	92.5844	18.66	66.61	0	0	0.8318	0.0544	0	0.0255	0.045	14.87	0	0
		TCCOL1_FK1@33	2014-07-24	11:57:00	4102	8075	5.72e-09	6.03e-09	46	55	0	20	nd	nd	56848	11493	3.37156e+09	6.71348e+06	2.261	0.05849	30	0.00199121	0.0020237	0.983944	-16.0556		6.70762	0	93.2924	18.78	66.12	0	0	0.7984	0.0083	0	0	0.05	15.9	0.0262	0
		TCCOL1_FK1@34	2014-07-24	12:01:00	4002	8000	5.63e-09	6.02e-09	46	56	0	16	nd	nd	57999	11441	3.36653e+09	6.70178e+06	2.017	0.05421	30	0.00199071	0.0020237	0.9837	-16.3001		9.11777	0	90.8822	18.76	66.23	0	0.0434	1.0517	0	0	0.0306	0.0849	15.01	0.1135	0.0274
		TCCOL1_FK1@43	2014-07-24	12:38:00	4099	7991	5.28e-09	6.04e-09	51	55	0	10	nd	nd	56535	11190	3.39628e+09	6.76545e+06	2.727	0.04728	30	0.00199202	0.0020237	0.984344	-15.6559		7.79	0	92.21	18.73	66.19	0	0	0.92	0.01	0.01	0.02	0.06	15.6	0.05	0
		TCCOL1_FK1@44	2014-07-24	12:42:00	4065	8091	5.25e-09	6.03e-09	53	58	0	7	nd	nd	55174	11472	3375506937	6.72162e+06	2.309	0.05821	30	0.00199129	0.0020237	0.983987	-16.0128		6.45429	0	93.5457	18.67	66.14	0	0	0.744	0	0.0236	0.0383	0.05	15.44	0	0.0091
		TCCOL1_FK1@45	2014-07-24	12:46:00	3873	8043	5.23e-09	6.05e-09	51	62	0	10	nd	nd	57581	11545	3.33374e+09	6.63785e+06	2.189	0.09318	30	0.00199111	0.0020237	0.983899	-16.1012		6.48053	0	93.5195	18.67	66.38	0	0	0.7332	0.0163	0.0056	0.0931	0.085	15.15	0	0
		TCBOA12_FK1@19	2014-07-24	14:50:00	5218	-2445	6.14e-09	6.18e-09	20	29	0	11	nd	nd	66370	12487	3.5488e+09	7.07363e+06	3.235	0.04383	30	0.00199324	0.0020237	0.984951	-15.0488		8.44942	0	91.5506	18.49	65.83	0	0	1.0081	0	0	0.0588	0.01	15.64	0	0
		TCBOA12_FK1@20	2014-07-24	14:54:00	5299	-2454	6.24e-09	6.17e-09	22	30	0	9	nd	nd	68463	11755	3.52999e+09	7.03693e+06	3.408	0.04549	30	0.00199347	0.0020237	0.985065	-14.9352		9.09143	0	90.9086	18.1	66.12	0	0.0395	1.0742	0	0.0056	0.0447	0.025	15.38	0	0
		TCBOA12_FK1@21	2014-07-24	14:58:00	5315	-2364	6.3e-09	6.16e-09	22	29	0	10	nd	nd	68358	12529	3.49688e+09	6.96852e+06	2.972	0.06259	30	0.00199279	0.0020237	0.984725	-15.2754		7.51915	0	92.4808	18.18	65.76	0	0	0.8949	0	0.007	0.0486	0.0701	15.76	0	0
		TCBOA12_FK1@34	2014-07-24	15:51:00	5400	-2484	5.98e-09	5.95e-09	29	33	0	6	nd	nd	57581	11744	3.40878e+09	6.80018e+06	4.105	0.05146	30	0.0019949	0.0020237	0.985769	-14.2308		4.84047	0	95.1595	18.16	65.83	0	0.0434	0.5716	0.0123	0.0153	0.0038	0.05	16.09	0	0
		TCBOA12_FK1@35	2014-07-24	15:56:00	5398	-2396	5.99e-09	5.95e-09	28	31	0	8	nd	nd	59778	12393	3.38703e+09	6.75462e+06	3.676	0.06121	30	0.00199426	0.0020237	0.985453	-14.5468		7.28395	0	92.7161	18.26	65.67	0	0.0099	0.868	0	0	0	0.03	15.82	0	0.1692
		TCBOA12_FK1@36	2014-07-24	16:00:00	5441	-2428	5.99e-09	5.95e-09	30	33	0	5	nd	nd	59987	12236	3.42401e+09	6.82875e+06	3.774	0.04212	30	0.00199437	0.0020237	0.985508	-14.4921		6.96	0	93.04	18.22	65.71	0	0	0.82	0.01	0.01	0.02	0.04	15.74	0	0
		CHR50_FK1@15	2014-07-24	17:56:00	752	7445	8.64e-09	5.95e-09	29	13	0	11	nd	nd	55070	11430	3.39572e+09	6.76848e+06	3.306	0.05666	30	0.00199324	0.0020237	0.984948	-15.0523		6.62128	0	93.3787	18.32	66.31	0	0	0.7765	0.0313	0.0317	0.0251	0	15.68	0	0
		CHR50_FK1@16	2014-07-24	18:01:00	817	7577	9.01e-09	5.94e-09	30	14	0	11	nd	nd	55460	11100	3.36403e+09	6.70457e+06	3.231	0.04842	30	0.00199302	0.0020237	0.984841	-15.1589		6.66904	0	93.331	18.08	66.16	0	0.0082	0.783	0	0.0086	0	0.0414	15.69	0.0665	0
		CHR50_FK1@17	2014-07-24	18:05:00	718	7591	9.1e-09	5.94e-09	31	17	0	11	nd	nd	57790	11294	3.35954e+09	6.69533e+06	3.156	0.05784	30	0.00199293	0.0020237	0.984797	-15.2026		7.25889	0	92.7411	18.44	66.1	0	0.0408	0.8615	0	0	0.0369	0.0363	15.76	0.023	0
		CHR50_FK1@23	2014-07-24	18:29:00	763	7649	8.7e-09	5.91e-09	32	17	0	13	nd	nd	56011	11870	3.38133e+09	6.74053e+06	3.344	0.05401	30	0.00199346	0.0020237	0.985056	-14.9444		5.71816	0	94.2818	18.42	66.15	0	0	0.6684	0	0	0.0198	0.1138	15.78	0.0719	0
		CHR50_FK1@24	2014-07-24	18:33:00	678	7395	8.88e-09	5.9e-09	31	16	0	12	nd	nd	57058	11985	3.36954e+09	6.71737e+06	3.373	0.04836	30	0.00199356	0.0020237	0.985107	-14.8928		7.05672	0	92.9433	18.44	66.89	0	0	0.8272	0	0	0.0581	0.0207	15.6	0.0526	0
		CHR50_FK1@25	2014-07-24	18:37:00	721	7310	8.93e-09	5.88e-09	30	15	0	9	nd	nd	57895	11504	3.37016e+09	6.71946e+06	3.571	0.05877	30	0.00199381	0.0020237	0.98523	-14.7698		7.89646	0	92.1035	18.64	66.5	0	0.0306	0.9221	0	0	0	0.0414	15.4	0	0.0565
		CHR10_FK1@1	2014-07-24	20:23:00	-2641	-5621	8.48e-09	5.87e-09	5	-53	0	34	nd	nd	23994	6711	3.20956e+09	6.38281e+06	1.62	0.03832	30	0.00198869	0.0020237	0.982699	-17.3014		6.30763	0	93.6924	18.46	65.73	0	0	0.7363	0	0.014	0.0474	0.03	15.66	0	0
		CHR10_FK1@2	2014-07-24	20:27:00	-2350	-5566	7.89e-09	5.85e-09	8	-56	0	38	nd	nd	33407	6573	3.21999e+09	6.40438e+06	1.803	0.06092	30	0.00198894	0.0020237	0.982827	-17.1734		6.40472	0	93.5953	18.35	65.74	0	0.0593	0.7551	0.0141	0.0111	0.0217	0.0752	15.8	0	0.0794
		CHR10_FK1@3	2014-07-24	20:31:00	-2490	-5666	7.77e-09	5.84e-09	10	-56	0	28	nd	nd	34046	6413	3.19802e+09	6.3599e+06	1.697	0.05746	30	0.0019887	0.0020237	0.982704	-17.2959		6.78061	0	93.2194	18.3	65.73	0	0	0.8001	0	0	0.0486	0	15.75	0	0
		CHR10_FK1@4	2014-07-24	20:35:00	-2513	-5533	7.64e-09	5.85e-09	11	-53	0	27	nd	nd	33940	6456	3.18717e+09	6.34174e+06	2.228	0.04868	30	0.00198977	0.0020237	0.983235	-16.7655		6.28288	0	93.7171	18.66	65.89	0	0	0.7379	0.0147	0	0.0448	0.0501	15.76	0	0.0626
		CHR10_FK1@5	2014-07-24	20:39:00	-2320	-5471	7.59e-09	5.85e-09	13	-53	0	26	nd	nd	35005	7542	3.21326e+09	6.39242e+06	1.875	0.03461	30	0.00198939	0.0020237	0.983047	-16.9533		8.36357	0	91.6364	18.32	66.01	0	0	0.9778	0	0	0.0179	0	15.34	0	0.0157
		CHR10_FK1@42	2014-07-24	23:12:00	-2522	-5611	7.57e-09	5.84e-09	11	-55	0	12	nd	nd	33829	8093	3.27649e+09	6.5275e+06	3.24	0.06363	30	0.00199222	0.0020237	0.984446	-15.5544		6.98273	0	93.0173	18.51	65.65	0	0	0.8184	0	0	0.0256	0.01	15.61	0	0.0182
		CHR10_FK1@43	2014-07-24	23:17:00	-2405	-5544	7.27e-09	5.81e-09	17	-57	0	12	nd	nd	31946	7413	3.27551e+09	6.52552e+06	3.341	0.04678	30	0.00199222	0.0020237	0.984443	-15.5567		6.33494	0	93.6651	18.5	65.59	0	0.0079	0.7449	0	0.0334	0.0268	0.0201	15.77	0	0.0547
		CHR10_FK1@44	2014-07-24	23:21:00	-2612	-5560	7.04e-09	5.87e-09	8	-54	0	14	nd	nd	36603	7361	3.2672e+09	6.49835e+06	1.708	0.04575	30	0.00198896	0.0020237	0.982836	-17.1637		9.63675	0	90.3633	18.57	65.93	0	0.0908	1.1388	0	0.007	0.0358	0.0802	15.29	0	0.1214
		CHR10_FK1@45	2014-07-24	23:25:00	-2383	-5456	6.94e-09	5.99e-09	16	-56	0	12	nd	nd	33727	6008	3.30632e+09	6.57692e+06	2.045	0.04835	30	0.0019892	0.0020237	0.982952	-17.0475		6.74875	0	93.2512	18.74	66.36	0	0	0.7804	0	0.0042	0.0345	0.005	15.44	0	0.1004
		CHR10_FK1@46	2014-07-24	23:29:00	-2451	-5588	6.95e-09	6.08e-09	10	-61	0	15	nd	nd	34046	4985	3.38531e+09	6.74094e+06	3.244	0.04746	30	0.00199123	0.0020237	0.983957	-16.0432		3.25577	0	96.7442	18.45	66.29	0	0.0711	0.3824	0	0.0111	0.0064	0.0401	16.27	0	0.1209
	Gstd0010	CHR10_AB1@47	2014-07-24	23:33:00	5149	-2304	6.92e-09	6.15e-09	0	10	0	4	nd	nd	61958	10110	3.49162e+09	6.95871e+06	3.413	0.0757	30	0.00199298	0.00202395	0.984186	-15.8144		11.25	0	88.75	18.58	64.72	0	0	1.3058	0.0105	0	0.019	1.0198	14.75	0.2956	0
		CHR10_AB1@48	2014-07-24	23:37:00	5038	-2320	7.27e-09	6.19e-09	-1	9	0	3	nd	nd	69735	10110	3.52414e+09	7.02645e+06	3.848	0.06162	30	0.00199381	0.00202395	0.984596	-15.4044		10.7449	0	89.2551	19.07	65.24	0	0	1.2418	0	0	0.0586	0.7976	14.77	0.2314	0
		CHR10_AB1@49	2014-07-24	23:41:00	5098	-2396	7.31e-09	6.16e-09	-3	11	0	0	nd	nd	70055	10547	3.49399e+09	6.96865e+06	4.105	0.05735	30	0.00199447	0.00202395	0.984922	-15.0784		10.3846	0	89.6154	18.73	65.11	0	0.0471	1.184	0.0047	0	0	0.8865	14.63	0.2706	0
		CHR10_AB1@50	2014-07-24	23:46:00	5191	-2359	7.31e-09	6.13e-09	-3	8	0	4	nd	nd	69203	10024	3.47818e+09	6.94369e+06	5.128	0.05856	30	0.00199636	0.00202395	0.985856	-14.1438		10.6423	0	89.3577	18.82	65.3	0	0.0078	1.2252	0	0.018	0.0521	0.9707	14.73	0.2998	0.0092
		CHR10_AB1@51	2014-07-24	23:50:00	5281	-2347	7.44e-09	6.1e-09	1	8	0	4	nd	nd	68776	10919	3.47156e+09	6.93075e+06	5.036	0.04723	30	0.00199644	0.00202395	0.985896	-14.1044		10.6723	0	89.3277	18.56	65.23	0	0	1.2249	0.0117	0	0	1.0546	14.68	0.3011	0
		CHR10_AB1@81	2014-07-25	01:54:00	5205	-2440	6.46e-09	5.75e-09	0	-1	0	3	nd	nd	57377	12219	3.33782e+09	6.66382e+06	4.783	0.05051	30	0.00199646	0.00202395	0.985905	-14.0949		10.6801	0	89.3199	18.66	65.28	0	0	1.2117	0	0	0	0.8773	14.51	0.2121	0
		CHR10_AB1@82	2014-07-25	01:58:00	5232	-2275	6.85e-09	5.75e-09	-4	-3	0	6	nd	nd	59674	13031	3.30915e+09	6.60532e+06	4.408	0.04818	30	0.00199608	0.00202395	0.985716	-14.2837		10.7253	0	89.2747	18.45	65.41	0	0.0157	1.2401	0	0.0042	0	0.7719	14.78	0.2171	0
		CHR10_AB1@83	2014-07-25	02:02:00	5059	-2457	6.74e-09	5.79e-09	-3	-5	0	5	nd	nd	61034	12927	3.32641e+09	6.63447e+06	3.675	0.06041	30	0.00199448	0.00202395	0.984931	-15.0694		10.1256	0	89.8744	18.79	65.07	0	0	1.148	0	0.0139	0.0229	0.961	14.59	0.2412	0
		CHR10_AB1@84	2014-07-25	02:06:00	5292	-2412	6.94e-09	5.88e-09	-4	-1	0	1	nd	nd	58336	11623	3.3973e+09	6.78088e+06	4.654	0.04738	30	0.00199596	0.00202395	0.98566	-14.3395		10.7902	0	89.2098	18.62	65.15	0	0	1.2502	0	0	0.0102	0.9165	14.8	0.2047	0
		CHR10_AB1@85	2014-07-25	02:10:00	5126	-2459	6.9e-09	6e-09	-7	-4	0	1	nd	nd	56845	10142	3.45278e+09	6.88303e+06	3.642	0.07989	30	0.00199347	0.00202395	0.984431	-15.569		10.4895	0	89.5105	18.51	65.22	0	0.051	1.19	0	0	0.0127	0.9858	14.54	0.2821	0
		MOR59_AB1@1	2014-07-25	09:54:00	1112	8463	9.95e-09	5.9e-09	39	81	0	40	nd	nd	26376	7105	3.34413e+09	6.671e+06	4.732	0.063	30	0.00199484	0.00202395	0.985106	-14.8943		11.2432	0	88.7568	18.46	63.94	0	0	1.2598	0.0278	0	0.0076	0.9163	14.24	0.2445	0
		MOR59_AB1@2	2014-07-25	09:58:00	1181	8332	9.78e-09	5.89e-09	40	78	0	35	nd	nd	39267	7159	3.34857e+09	6.68006e+06	4.76	0.0576	30	0.0019949	0.00202395	0.985137	-14.8633		11.216	0	88.784	18.64	64.26	0	0	1.2793	0	0	0	1.0247	14.5	0.3756	0.0092
		MOR59_AB1@3	2014-07-25	10:02:00	998	8350	9.43e-09	5.89e-09	41	78	0	34	nd	nd	38538	7308	3.34024e+09	6.66355e+06	4.751	0.05383	30	0.00199493	0.00202395	0.985152	-14.8478		10.2925	0	89.7075	18.48	64.22	0	0	1.1707	0.0066	0.0139	0	1.0157	14.61	0.2547	0
		MOR59_AB1@20	2014-07-25	11:12:00	1194	8417	7.61e-09	6.06e-09	44	83	0	22	nd	nd	35751	3526	3.44763e+09	6.88107e+06	5.817	0.07672	30	0.00199589	0.00202395	0.985623	-14.3772		10.3	0	89.71	18.55	64.15	0	0	1.168	0	0.01	0	0.95	14.57	0.2	0
		MOR59_AB1@21	2014-07-25	11:16:00	1261	8344	7.66e-09	6.06e-09	46	81	0	19	nd	nd	39693	4975	3.43876e+09	6.8652e+06	5.872	0.05411	30	0.00199641	0.00202395	0.985884	-14.1162		10.29	0	89.72	18.59	64.23	0	0	1.167	0.01	0	0.012	0.91	14.59	0.14	0.01
		MOR59_AB1@22	2014-07-25	11:20:00	953	8460	7.59e-09	6.05e-09	41	86	0	21	nd	nd	38627	4304	3.43789e+09	6.86009e+06	5.475	0.046	30	0.00199543	0.00202395	0.985399	-14.6006		10.283	0	89.717	18.6	64.1	0	0	1.1871	0	0	0.0114	0.8663	14.83	0.1141	0
	Gstd0011	MOR59_FK1@35	2014-07-25	12:15:00	5874	7059	7.12e-09	5.84e-09	94	4	0	30	nd	nd	28933	5806	3.28714e+09	6.57171e+06	7.12	0.05101	30	0.00199922	0.0020237	0.987902	-12.0979		5.17341	0	94.8266	18.32	65.07	0	0	0.5902	0.0063	0	0.0281	0.0699	15.49	0.006	0
		MOR59_FK1@36	2014-07-25	12:19:00	5875	6926	7.27e-09	5.82e-09	91	6	0	27	nd	nd	32874	6434	3.31426e+09	6.62246e+06	6.508	0.06098	30	0.00199817	0.0020237	0.987388	-12.6122		5.60049	0	94.3995	18.48	64.96	0	0	0.6501	0	0	0.0344	0.0849	15.69	0	0.0273
		MOR59_FK1@37	2014-07-25	12:23:00	5760	7110	7.4e-09	5.79e-09	95	8	0	28	nd	nd	32661	6200	3.30241e+09	6.59934e+06	6.625	0.05611	30	0.00199834	0.0020237	0.987471	-12.5291		5.71496	0	94.285	18.25	64.79	0	0.0019	0.6498	0	0.0139	0.0446	0.0499	15.35	0.0544	0
		MOR59_FK1@46	2014-07-25	13:00:00	5804	7204	6.85e-09	5.75e-09	100	7	0	29	nd	nd	29146	6477	3.27146e+09	6.53866e+06	6.752	0.06836	30	0.0019987	0.0020237	0.987647	-12.3531		6.38211	0	93.6179	18.48	65.34	0	0	0.7294	0	0	0.0179	0.0899	15.32	0	0
		MOR59_FK1@47	2014-07-25	13:05:00	5710	7028	6.74e-09	5.86e-09	91	10	0	23	nd	nd	32661	6008	3.33816e+09	6.67095e+06	6.688	0.05989	30	0.00199839	0.0020237	0.987494	-12.5059		6.13746	0	93.8625	18.29	65.25	0	0	0.7092	0	0	0.0676	0	15.53	0	0
		MOR59_FK1@48	2014-07-25	13:09:00	5824	6841	7.02e-09	5.96e-09	85	11	0	21	nd	nd	32555	5422	3.39263e+09	6.77603e+06	6.227	0.04795	30	0.00199728	0.0020237	0.986943	-13.0566		9.39452	0	90.6055	18.3	64.98	0	0.0197	1.071	0	0.0194	0.0319	0	14.79	0	0.0273
		MOR61_FK1@25	2014-07-25	16:08:00	-158	-6260	4.97e-09	5.78e-09	-1	3	0	16	nd	nd	49813	12208	3.30765e+09	6.58545e+06	2.001	0.05604	30	0.00199097	0.0020237	0.98383	-16.17		7.93	0	92.07	18.29	65.73	0	0	0.94	0	0.02	0.05	0.02	15.58	0.06	0.01
		MOR61_FK1@26	2014-07-25	16:12:00	-280	-6396	4.92e-09	5.8e-09	-7	-4	0	18	nd	nd	55488	11190	3.32201e+09	6.61475e+06	2.273	0.06443	30	0.00199119	0.0020237	0.983936	-16.0644		6.46371	0	93.5363	18.26	65.32	0	0.0019	0.7524	0.0211	0	0.0267	0.04	15.59	0.0829	0
		MOR61_FK1@27	2014-07-25	16:17:00	-130	-6449	4.95e-09	5.81e-09	-1	-6	0	17	nd	nd	55460	11484	3.33413e+09	6.64162e+06	2.647	0.05336	30	0.00199201	0.0020237	0.98434	-15.6597		10.0986	0	89.9014	18.34	66.09	0	0	1.2003	0	0.0292	0.0574	0.01	15.3	0.0829	0
		MOR61_FK1@36	2014-07-25	16:54:00	-305	-6507	4.97e-09	5.78e-09	-6	-8	0	12	nd	nd	50985	10493	3.32179e+09	6.61529e+06	2.498	0.0382	30	0.00199148	0.0020237	0.984081	-15.9188		5.92075	0	94.0792	18.44	65.04	0	0.0118	0.6861	0	0	0.0407	0.035	15.61	0.1219	0.0091
		MOR61_FK1@37	2014-07-25	16:58:00	-223	-6313	4.95e-09	5.78e-09	-3	-5	0	14	nd	nd	54671	10726	3.28727e+09	6.5495e+06	2.927	0.04764	30	0.00199238	0.0020237	0.984525	-15.4751		6.12738	0	93.8726	18.26	65.55	0	0	0.7189	0	0.0264	0.0267	0	15.77	0	0
		MOR61_FK1@38	2014-07-25	17:02:00	-60	-6614	4.85e-09	5.77e-09	1	-14	0	14	nd	nd	48961	10120	3.32219e+09	6.62419e+06	3.816	0.07529	30	0.00199392	0.0020237	0.985286	-14.7142		5.89013	0	94.1099	18.31	65.84	0	0	0.6867	0	0	0.042	0.0449	15.71	0.0302	0.0272

## Sheet: 3.Quartz SIMS data
		SIMS data of quartz standard		SIMS DATA→
				Centre de Recherches Pétrographiques et Géochimiques, Nancy. Cameca IMF 1280 HR.
								Chamber	Primary					Field	Offset					d18O ‰	Error ‰		SIMS	Fluorination	calculated	calculated
		Standard	Analysis	Date	Hour	X (µm)	Y (µm)	Pressure (Torr)	Intensity (A)	LT1 def X	LT1 def Y	CA def X	CA def Y	Drift	Drift	Bf_L'2	Bf_H1	16O	18O	VSMOW	VSMOW	nb cycles	18O /16O	18O /16O	IMF	IMF (‰)
		Gstd0012	Pattern3_QUARS@1	2014-07-22	16:55:00	-6993	-664	6.9e-09	6.11e-09	38	10	0	24	nd	nd	61213	13998	3.58918e+09	7.12078e+06	-1.641	0.04062	30	0.00198396	0.00202398	0.980224	-19.7757
			Pattern3_QUARS@2	2014-07-22	16:59:00	-6744	-717	6.85e-09	6.09e-09	46	9	0	23	nd	nd	70869	14036	3.55486e+09	7.05335e+06	-1.569	0.05107	30	0.00198414	0.00202398	0.980316	-19.6837
			Pattern3_QUARS@3	2014-07-22	17:03:00	-6925	-870	6.9e-09	6.07e-09	41	-8	0	33	nd	nd	66161	14119	3.39254e+09	6.73517e+06	-1.098	0.06323	30	0.00198529	0.00202398	0.980883	-19.1168
			Pattern3_QUARS@4	2014-07-22	17:07:00	-5453	-1711	6.95e-09	6.05e-09	46	36	0	11	nd	nd	60929	12299	3.63905e+09	7.22268e+06	-0.969	0.04566	30	0.00198477	0.00202398	0.980625	-19.375
			Pattern3_QUARS@5	2014-07-22	17:11:00	-5705	-1943	6.94e-09	6.04e-09	53	35	0	12	nd	nd	59150	11974	3.67892e+09	7.31138e+06	0.406	0.04787	30	0.00198737	0.00202398	0.981912	-18.0881
			Pattern3_QUARS@6	2014-07-22	17:15:00	-5772	-2135	6.9e-09	6.02e-09	52	37	0	10	nd	nd	60999	11527	3.64598e+09	7.24231e+06	-0.0458	0.05722	30	0.00198638	0.00202398	0.981422	-18.5776
			Pattern3_QUARS@7	2014-07-22	17:19:00	-7772	-2695	6.98e-09	6e-09	-15	82	0	2	nd	nd	33516	5906	3.45405e+09	6.85759e+06	0.172	0.04974	30	0.00198538	0.00202398	0.980926	-19.0742
			Pattern3_QUARS@8	2014-07-22	17:23:00	-7729	-2807	6.92e-09	5.99e-09	-14	80	0	3	nd	nd	32574	6418	3.47637e+09	6.90433e+06	0.456	0.03699	30	0.00198608	0.00202398	0.981271	-18.7285
			Pattern3_QUARS@9	2014-07-22	17:28:00	-7902	-2893	6.81e-09	5.97e-09	-18	79	0	4	nd	nd	34039	6450	3.45168e+09	6.85445e+06	0.321	0.04369	30	0.00198583	0.00202398	0.98115	-18.8496
			TCSAU020_Q@33	2014-07-23	14:23:00	7033	5535	6.92e-09	5.77e-09	30	-2	0	21	nd	nd	57790	13659	3.62648e+09	7.20353e+06	-0.359	0.03991	30	0.00198637	0.00202398	0.981416	-18.5838
			TCSAU020_Q@34	2014-07-23	14:27:00	7114	5613	6.98e-09	5.76e-09	33	-5	0	18	nd	nd	66684	13669	3.51693e+09	6.99098e+06	0.305	0.07247	30	0.00198781	0.00202398	0.982129	-17.8714
			TCSAU020_Q@35	2014-07-23	14:31:00	7107	5446	7e-09	5.74e-09	35	-9	0	19	nd	nd	70869	13973	3.48102e+09	6.91849e+06	0.08721	0.0633	30	0.00198749	0.00202398	0.981971	-18.0287
			TCSAU020_Q@45	2014-07-23	15:12:00	7190	5496	6.42e-09	5.73e-09	38	-12	0	20	nd	nd	60406	12853	3.43316e+09	6.82525e+06	0.493	0.05491	30	0.00198803	0.00202398	0.982239	-17.7615
			TCSAU020_Q@46	2014-07-23	15:16:00	6995	5450	6.55e-09	5.73e-09	34	-9	0	13	nd	nd	68776	13722	3.38897e+09	6.73313e+06	-0.291	0.0463	30	0.00198678	0.00202398	0.981617	-18.3826
			TCSAU020_Q@47	2014-07-23	15:20:00	7048	5344	6.61e-09	5.73e-09	34	-8	0	11	nd	nd	68358	13397	3.42497e+09	6.80452e+06	-0.241	0.05537	30	0.00198674	0.00202398	0.9816	-18.3999
			TCBOA2_Q@71	2014-07-24	01:09:00	6607	-1156	8.24e-09	5.64e-09	68	42	0	0	nd	nd	46281	9359	3.50422e+09	6.97213e+06	1.84	0.06526	30	0.00198964	0.00202398	0.983032	-16.9681
			TCBOA2_Q@72	2014-07-24	01:13:00	6590	-1313	8.36e-09	5.63e-09	68	44	0	-3	nd	nd	48896	8699	3.48894e+09	6.94467e+06	2.355	0.06335	30	0.00199048	0.00202398	0.983448	-16.5521
			TCBOA2_Q@73	2014-07-24	01:17:00	6496	-1384	8.56e-09	5.62e-09	69	43	0	-2	nd	nd	46281	8930	3.48401e+09	6.93385e+06	2.174	0.04294	30	0.00199019	0.00202398	0.983306	-16.6939
			TCBOA2_Q@74	2014-07-24	01:21:00	6699	-1277	8.58e-09	5.61e-09	71	46	0	-6	nd	nd	44607	8898	3.43977e+09	6.85288e+06	3.197	0.06252	30	0.00199225	0.00202398	0.984321	-15.6789
			TCBOA2_Q@89	2014-07-24	02:23:00	6696	-1140	7.42e-09	5.65e-09	68	43	0	-3	nd	nd	46699	8166	3.47397e+09	6.91455e+06	2.379	0.06069	30	0.00199039	0.00202398	0.983402	-16.5983
			TCBOA2_Q@90	2014-07-24	02:27:00	6566	-1210	7.84e-09	5.64e-09	67	41	0	-2	nd	nd	48478	8480	3.5005e+09	6.96861e+06	2.523	0.06074	30	0.00199074	0.00202398	0.983578	-16.4222
			TCBOA2_Q@91	2014-07-24	02:32:00	6629	-1378	8.06e-09	5.63e-09	68	47	0	-6	nd	nd	47536	8762	3.45292e+09	6.8779e+06	3.051	0.06205	30	0.00199191	0.00202398	0.984152	-15.8477
			TCBOA2_Q@92	2014-07-24	02:36:00	6490	-1437	8.04e-09	5.62e-09	68	43	0	-3	nd	nd	48583	9578	3.47791e+09	6.92257e+06	2.203	0.05171	30	0.00199044	0.00202398	0.983428	-16.5716
			TCBOA2_Q@93	2014-07-24	02:40:00	6552	-1483	8.11e-09	5.61e-09	67	46	0	-5	nd	nd	48059	9076	3.46102e+09	6.89028e+06	2.462	0.05397	30	0.00199082	0.00202398	0.983617	-16.383
			TCCOL1_Q@16	2014-07-24	10:16:00	-7784	-1220	7.38e-09	6.3e-09	-2	81	0	35	nd	nd	30900	4211	3.40395e+09	6.73849e+06	-2.543	0.04894	30	0.00197961	0.00202398	0.978076	-21.9238
			TCCOL1_Q@17	2014-07-24	10:20:00	-7777	-1364	7.12e-09	6.32e-09	-4	82	0	29	nd	nd	41886	5383	3.42319e+09	6.77787e+06	-2.475	0.04999	30	0.00197998	0.00202398	0.978262	-21.7379
			TCCOL1_Q@18	2014-07-24	10:24:00	-7701	-1293	7.08e-09	6.33e-09	1	80	0	24	nd	nd	48373	7172	3.36637e+09	6.66386e+06	-2.98	0.06053	30	0.00197954	0.00202398	0.978041	-21.9586
			TCCOL1_Q@29	2014-07-24	11:10:00	-7709	-1487	6.33e-09	6.17e-09	2	82	0	8	nd	nd	50989	9202	3.37397e+09	6.68608e+06	-2.208	0.04525	30	0.00198166	0.00202398	0.979092	-20.908
			TCCOL1_Q@30	2014-07-24	11:14:00	-7690	-1607	6.18e-09	6.14e-09	-3	81	0	10	nd	nd	50675	9390	3.36355e+09	6.66577e+06	-2.188	0.06551	30	0.00198177	0.00202398	0.979143	-20.8572
			TCCOL1_Q@31	2014-07-24	11:18:00	-7817	-1718	6.16e-09	6.13e-09	-7	82	0	8	nd	nd	49210	9170	3.34111e+09	6.62198e+06	-2.064	0.0609	30	0.00198197	0.00202398	0.979242	-20.7578
			CHR10_Q@102	2014-07-25	03:21:00	6206	6502	6.68e-09	5.81e-09	14	5	0	4	nd	nd	58869	12571	3.50837e+09	6979225	1.215	0.06287	30	0.00198931	0.00202398	0.982867	-17.1326
			CHR10_Q@103	2014-07-25	03:25:00	6174	6616	6.92e-09	5.91e-09	16	10	0	3	nd	nd	59934	12741	3.56611e+09	7.092e+06	0.925	0.04909	30	0.00198872	0.00202398	0.982578	-17.4221
			CHR10_Q@104	2014-07-25	03:30:00	6318	6564	7.08e-09	6.01e-09	15	8	0	6	nd	nd	58836	9861	3.57968e+09	7.12512e+06	2.201	0.04671	30	0.00199043	0.00202398	0.983424	-16.5762
			CHR10_Q@105	2014-07-25	03:34:00	6344	6501	7.12e-09	6.08e-09	14	8	0	3	nd	nd	60092	9149	3.61594e+09	7.19521e+06	2.024	0.05635	30	0.00198986	0.00202398	0.98314	-16.8601
			CHR10_Q@106	2014-07-25	03:38:00	6257	6648	7.02e-09	6.08e-09	13	10	0	5	nd	nd	64515	9982	3.65333e+09	7.26861e+06	1.786	0.05997	30	0.00198959	0.00202398	0.983006	-16.9942
			CHR10_Q@120	2014-07-25	04:36:00	6073	6595	1.18e-08	5.77e-09	20	10	0	6	nd	nd	61975	12958	3.5192e+09	6.9974e+06	0.684	0.0745	30	0.00198835	0.00202398	0.982395	-17.6051
			CHR10_Q@121	2014-07-25	04:40:00	6141	6722	2.11e-08	5.9e-09	19	11	0	4	nd	nd	62278	12006	3.57859e+09	7.11359e+06	0.583	0.07537	30	0.00198782	0.00202398	0.982133	-17.8667
			CHR10_Q@122	2014-07-25	04:44:00	6030	6679	3.7e-08	6.01e-09	16	12	0	6	nd	nd	63231	11535	3.65813e+09	7.27249e+06	0.794	0.0475	30	0.00198804	0.00202398	0.982241	-17.7589
			CHR10_Q@123	2014-07-25	04:48:00	5938	6703	6.79e-08	6.06e-09	14	17	0	4	nd	nd	65951	10499	3.64589e+09	7.24166e+06	0.03048	0.05365	30	0.00198625	0.00202398	0.981357	-18.6426
			CHR10_Q@124	2014-07-25	04:52:00	5883	6778	1.51e-07	6.07e-09	15	18	0	3	nd	nd	67498	10749	3.64658e+09	7.24038e+06	-0.37	0.05272	30	0.00198552	0.00202398	0.980999	-19.0013
			MOR61_Q@15	2014-07-25	15:07:00	-531	9778	6.14e-09	5.8e-09	3	33	0	32	nd	nd	57697	11729	3.31521e+09	6.58123e+06	-0.852	0.04999	30	0.00198516	0.00202398	0.980819	-19.181
			MOR61_Q@16	2014-07-25	15:11:00	-655	9742	6.03e-09	5.81e-09	3	32	0	34	nd	nd	58336	11963	3.31462e+09	6.58057e+06	-0.809	0.05548	30	0.00198532	0.00202398	0.980896	-19.1037
			MOR61_Q@17	2014-07-25	15:15:00	-579	9836	5.92e-09	5.8e-09	2	36	0	33	nd	nd	57803	12123	3.31244e+09	6.57635e+06	-0.818	0.06259	30	0.00198535	0.00202398	0.980913	-19.0874
			MOR61_Q@22	2014-07-25	15:36:00	-607	9680	5.7e-09	5.8e-09	5	37	0	28	nd	nd	58017	11697	3.33718e+09	6.62524e+06	-0.775	0.05184	30	0.00198528	0.00202398	0.980878	-19.1222
			MOR61_Q@23	2014-07-25	15:40:00	-494	9844	5.56e-09	5.8e-09	10	35	0	29	nd	nd	57058	11591	3.25036e+09	6.45088e+06	-1.114	0.05575	30	0.00198467	0.00202398	0.980575	-19.4245
			MOR61_Q@24	2014-07-25	15:44:00	-553	9885	5.49e-09	5.78e-09	2	40	0	32	nd	nd	56312	11782	3.34461e+09	6.6415e+06	-0.556	0.04959	30	0.00198573	0.00202398	0.981102	-18.8983

## Sheet: 4.Fluorination reference values
				δ18O ‰ VSMOW
				Bulk fluorination determinations (n)				Average	1σ	PDF (1)
	Mineral	Label	Mineral	1	2	3	4
	Plagioclase	GSTD 0001	Albite	9.9	9.6	9.7		9.73333	0.152753	N
		GSTD 0002	Albite	12.2	12.4	12.5		12.3667	0.152753	N
		GSTD 0003	Oligoclase	8.2	8.2			8.2	0.05	R
		GSTD 0004	Andesine/Labradorite	7.1	7.9			7.5	0.23094	R
		GSTD 0005	Labradorite	7.8	7.4	7.3		7.5	0.264575	N
		GSTD 0006	Labradorite	7.5	7.2	7.3		7.33333	0.152753	N
		GSTD 0008	Bytownite	6.9	6.8			6.85	0.0288675	R
		GSTD 0009	Anorthite	7.4	6.7			7.05	0.202073	R
	K-feldspar	GSTD 0010	Orthoclase	9.3	9.3			9.3	0.1	R
		GSTD 0011	Microcline	9	9.2	9.5	9.2	9.225	0.206155	N
	Quartz	GSTD 0012	Quartz	9.1	9.4	9.6		9.36667	0.251661	N
		(1) Probability distribution function (PDF) applied to calculate σ. N=Normal or Gaussian. R= Rectangular.
