# Supplementary material for: Predicting instrumental mass fractionation (IMF) of stable isotope SIMS analyses by response surface methodology (RSM)
Source: Royal Society of Chemistry journal article supplement (doi:10.1039/c6ja00397d), 2017-01-01
Supplement: c6ja00397d3.xlsx [file c6ja00397d3.xlsx]

## Sheet: Read me
	NOTES
1	This electronic supporting information S3 contains the designs of the Response Surface Models presented in "Predicting instrumental mass fractionation (IMF) of stable isotope SIMS analyses by response surface methodology (RSM)" by Fàbrega et al.
2	Models 1, 2 and 3 correspond to the main Response Surface Models of plagioclase, K-feldspar and quartz, respectively, presented in the results of the study.
3	Models 4, 5 and 6 correspond to the additional Response Surface Models of plagioclase, K-feldspar and quartz, respectively, expressely fitted to estimate the total uncertainty of the response surface predictions. Include the calculation of the total uncertainty at the end of each model. The residuals and 3D response surface plots of these models are not shown here, as they display the same shape …
4	The INPUTS and OUTPUTS data of each model can be directly copied and pasted from this spreadsheet to Minitab or other statistical softwares.
5	Sheet 7 contains several websites with extra resources dealing with response surface methodology and related statistical topics.
6	Recieving feedback about the data and the models presented in this study will be a pleasure.

## Sheet: 1.Plagioclase model
	1.Plagioclase Response Surface Model
	From row 4 to 451
1	MODEL DESIGN:
	Central Composite Design
	Factors:	7			Cube points:		128
	Base runs:	152			Center points in cube:		10
	Base blocks:	1			Axial points:		14
	Replicates:	1			Center points in axial:		0
	Total runs:	152			α		3.36359
	Total blocks:	1			Two-level factorial: Full factorial
					design matrix
	StdOrder	RunOrder	PtType	Blocks	A	B	C	D	E	F	G
	108	1	1	1	1	1	-1	1	-1	1	1
	8	2	1	1	1	1	1	-1	-1	-1	-1
	41	3	1	1	-1	-1	-1	1	-1	1	-1
	25	4	1	1	-1	-1	-1	1	1	-1	-1
	33	5	1	1	-1	-1	-1	-1	-1	1	-1
	63	6	1	1	-1	1	1	1	1	1	-1
	17	7	1	1	-1	-1	-1	-1	1	-1	-1
	107	8	1	1	-1	1	-1	1	-1	1	1
	140	9	-1	1	0	0	0	0	0	3.36359	0
	130	10	-1	1	3.36359	0	0	0	0	0	0
	113	11	1	1	-1	-1	-1	-1	1	1	1
	102	12	1	1	1	-1	1	-1	-1	1	1
	72	13	1	1	1	1	1	-1	-1	-1	1
	49	14	1	1	-1	-1	-1	-1	1	1	-1
	66	15	1	1	1	-1	-1	-1	-1	-1	1
	88	16	1	1	1	1	1	-1	1	-1	1
	97	17	1	1	-1	-1	-1	-1	-1	1	1
	11	18	1	1	-1	1	-1	1	-1	-1	-1
	149	19	0	1	0	0	0	0	0	0	0
	79	20	1	1	-1	1	1	1	-1	-1	1
	105	21	1	1	-1	-1	-1	1	-1	1	1
	85	22	1	1	-1	-1	1	-1	1	-1	1
	115	23	1	1	-1	1	-1	-1	1	1	1
	144	24	0	1	0	0	0	0	0	0	0
	2	25	1	1	1	-1	-1	-1	-1	-1	-1
	94	26	1	1	1	-1	1	1	1	-1	1
	90	27	1	1	1	-1	-1	1	1	-1	1
	137	28	-1	1	0	0	0	0	-3.36359	0	0
	83	29	1	1	-1	1	-1	-1	1	-1	1
	125	30	1	1	-1	-1	1	1	1	1	1
	89	31	1	1	-1	-1	-1	1	1	-1	1
	106	32	1	1	1	-1	-1	1	-1	1	1
	39	33	1	1	-1	1	1	-1	-1	1	-1
	1	34	1	1	-1	-1	-1	-1	-1	-1	-1
	136	35	-1	1	0	0	0	3.36359	0	0	0
	110	36	1	1	1	-1	1	1	-1	1	1
	86	37	1	1	1	-1	1	-1	1	-1	1
	60	38	1	1	1	1	-1	1	1	1	-1
	9	39	1	1	-1	-1	-1	1	-1	-1	-1
	56	40	1	1	1	1	1	-1	1	1	-1
	43	41	1	1	-1	1	-1	1	-1	1	-1
	147	42	0	1	0	0	0	0	0	0	0
	151	43	0	1	0	0	0	0	0	0	0
	109	44	1	1	-1	-1	1	1	-1	1	1
	3	45	1	1	-1	1	-1	-1	-1	-1	-1
	34	46	1	1	1	-1	-1	-1	-1	1	-1
	65	47	1	1	-1	-1	-1	-1	-1	-1	1
	58	48	1	1	1	-1	-1	1	1	1	-1
	29	49	1	1	-1	-1	1	1	1	-1	-1
	54	50	1	1	1	-1	1	-1	1	1	-1
	35	51	1	1	-1	1	-1	-1	-1	1	-1
	61	52	1	1	-1	-1	1	1	1	1	-1
	16	53	1	1	1	1	1	1	-1	-1	-1
	27	54	1	1	-1	1	-1	1	1	-1	-1
	81	55	1	1	-1	-1	-1	-1	1	-1	1
	30	56	1	1	1	-1	1	1	1	-1	-1
	38	57	1	1	1	-1	1	-1	-1	1	-1
	121	58	1	1	-1	-1	-1	1	1	1	1
	21	59	1	1	-1	-1	1	-1	1	-1	-1
	14	60	1	1	1	-1	1	1	-1	-1	-1
	143	61	0	1	0	0	0	0	0	0	0
	93	62	1	1	-1	-1	1	1	1	-1	1
	118	63	1	1	1	-1	1	-1	1	1	1
	77	64	1	1	-1	-1	1	1	-1	-1	1
	103	65	1	1	-1	1	1	-1	-1	1	1
	123	66	1	1	-1	1	-1	1	1	1	1
	129	67	-1	1	-3.36359	0	0	0	0	0	0
	4	68	1	1	1	1	-1	-1	-1	-1	-1
	82	69	1	1	1	-1	-1	-1	1	-1	1
	62	70	1	1	1	-1	1	1	1	1	-1
	64	71	1	1	1	1	1	1	1	1	-1
	98	72	1	1	1	-1	-1	-1	-1	1	1
	134	73	-1	1	0	0	3.36359	0	0	0	0
	37	74	1	1	-1	-1	1	-1	-1	1	-1
	148	75	0	1	0	0	0	0	0	0	0
	22	76	1	1	1	-1	1	-1	1	-1	-1
	104	77	1	1	1	1	1	-1	-1	1	1
	111	78	1	1	-1	1	1	1	-1	1	1
	28	79	1	1	1	1	-1	1	1	-1	-1
	10	80	1	1	1	-1	-1	1	-1	-1	-1
	119	81	1	1	-1	1	1	-1	1	1	1
	146	82	0	1	0	0	0	0	0	0	0
	50	83	1	1	1	-1	-1	-1	1	1	-1
	57	84	1	1	-1	-1	-1	1	1	1	-1
	20	85	1	1	1	1	-1	-1	1	-1	-1
	24	86	1	1	1	1	1	-1	1	-1	-1
	26	87	1	1	1	-1	-1	1	1	-1	-1
	132	88	-1	1	0	3.36359	0	0	0	0	0
	141	89	-1	1	0	0	0	0	0	0	-3.36359
	150	90	0	1	0	0	0	0	0	0	0
	145	91	0	1	0	0	0	0	0	0	0
	18	92	1	1	1	-1	-1	-1	1	-1	-1
	52	93	1	1	1	1	-1	-1	1	1	-1
	5	94	1	1	-1	-1	1	-1	-1	-1	-1
	152	95	0	1	0	0	0	0	0	0	0
	76	96	1	1	1	1	-1	1	-1	-1	1
	67	97	1	1	-1	1	-1	-1	-1	-1	1
	124	98	1	1	1	1	-1	1	1	1	1
	53	99	1	1	-1	-1	1	-1	1	1	-1
	131	100	-1	1	0	-3.36359	0	0	0	0	0
	70	101	1	1	1	-1	1	-1	-1	-1	1
	36	102	1	1	1	1	-1	-1	-1	1	-1
	46	103	1	1	1	-1	1	1	-1	1	-1
	84	104	1	1	1	1	-1	-1	1	-1	1
	142	105	-1	1	0	0	0	0	0	0	3.36359
	112	106	1	1	1	1	1	1	-1	1	1
	71	107	1	1	-1	1	1	-1	-1	-1	1
	80	108	1	1	1	1	1	1	-1	-1	1
	116	109	1	1	1	1	-1	-1	1	1	1
	92	110	1	1	1	1	-1	1	1	-1	1
	139	111	-1	1	0	0	0	0	0	-3.36359	0
	78	112	1	1	1	-1	1	1	-1	-1	1
	12	113	1	1	1	1	-1	1	-1	-1	-1
	126	114	1	1	1	-1	1	1	1	1	1
	15	115	1	1	-1	1	1	1	-1	-1	-1
	74	116	1	1	1	-1	-1	1	-1	-1	1
	128	117	1	1	1	1	1	1	1	1	1
	73	118	1	1	-1	-1	-1	1	-1	-1	1
	138	119	-1	1	0	0	0	0	3.36359	0	0
	117	120	1	1	-1	-1	1	-1	1	1	1
	95	121	1	1	-1	1	1	1	1	-1	1
	100	122	1	1	1	1	-1	-1	-1	1	1
	68	123	1	1	1	1	-1	-1	-1	-1	1
	101	124	1	1	-1	-1	1	-1	-1	1	1
	19	125	1	1	-1	1	-1	-1	1	-1	-1
	47	126	1	1	-1	1	1	1	-1	1	-1
	120	127	1	1	1	1	1	-1	1	1	1
	99	128	1	1	-1	1	-1	-1	-1	1	1
	44	129	1	1	1	1	-1	1	-1	1	-1
	45	130	1	1	-1	-1	1	1	-1	1	-1
	59	131	1	1	-1	1	-1	1	1	1	-1
	135	132	-1	1	0	0	0	-3.36359	0	0	0
	69	133	1	1	-1	-1	1	-1	-1	-1	1
	75	134	1	1	-1	1	-1	1	-1	-1	1
	114	135	1	1	1	-1	-1	-1	1	1	1
	42	136	1	1	1	-1	-1	1	-1	1	-1
	7	137	1	1	-1	1	1	-1	-1	-1	-1
	23	138	1	1	-1	1	1	-1	1	-1	-1
	91	139	1	1	-1	1	-1	1	1	-1	1
	51	140	1	1	-1	1	-1	-1	1	1	-1
	13	141	1	1	-1	-1	1	1	-1	-1	-1
	31	142	1	1	-1	1	1	1	1	-1	-1
	40	143	1	1	1	1	1	-1	-1	1	-1
	96	144	1	1	1	1	1	1	1	-1	1
	6	145	1	1	1	-1	1	-1	-1	-1	-1
	87	146	1	1	-1	1	1	-1	1	-1	1
	48	147	1	1	1	1	1	1	-1	1	-1
	55	148	1	1	-1	1	1	-1	1	1	-1
	122	149	1	1	1	-1	-1	1	1	1	1
	127	150	1	1	-1	1	1	1	1	1	1
	133	151	-1	1	0	0	-3.36359	0	0	0	0
	32	152	1	1	1	1	1	1	1	-1	-1
2	INPUT AND OUTPUT VARIABLES:
				INPUTS							OUTPUT
	Date	Hour	Label	X	Y	CP	PI	LT1defX	LT1defY	An	IMF
	2014-07-22	09:52:00	Pattern1_Ande003@3	6100	1791	8.28e-09	5.98e-09	-24	4	52.7719	0.983984
	2014-07-22	09:52:00	Pattern1_Ande001@1	5980	2231	8.58e-09	5.98e-09	-22	6	52.1	0.984069
	2014-07-22	09:52:00	Pattern1_Ande002@2	5933	2004	8.77e-09	5.97e-09	-23	4	51.5119	0.984197
	2014-07-22	10:24:00	Pattern1_Ande@4	6350	454	9.43e-09	5.95e-09	-28	1	51.7582	0.984731
	2014-07-22	10:28:00	Pattern1_Ande@5	6455	230	9.4e-09	5.96e-09	-29	1	52.6903	0.984927
	2014-07-22	10:32:00	Pattern1_Ande@6	6648	-149	9.32e-09	5.95e-09	-29	-1	52.3	0.984843
	2014-07-22	10:36:00	Pattern1_Ande@7	6821	-41	9.48e-09	5.95e-09	-28	-1	52.6889	0.984434
	2014-07-22	10:44:00	Pattern1_Ande@9	7411	842	9.78e-09	5.98e-09	-30	-2	51.7358	0.984059
	2014-07-22	11:18:00	Pattern1_OLIG@1	2042	-1828	7.29e-09	6.02e-09	-8	-3	24.0861	0.984952
	2014-07-22	11:22:00	Pattern1_OLIG@2	1938	-1709	7.12e-09	6.03e-09	-4	0	23.1164	0.984614
	2014-07-22	11:26:00	Pattern1_OLIG@3	1049	-1238	7.1e-09	6.02e-09	-1	2	24.1012	0.98517
	2014-07-22	11:30:00	Pattern1_OLIG@4	961	-1341	6.87e-09	6.02e-09	1	2	22.9277	0.985268
	2014-07-22	11:34:00	Pattern1_OLIG@5	72	-1516	6.81e-09	6.02e-09	7	-1	23.6316	0.985852
	2014-07-22	11:38:00	Pattern1_OLIG@6	72	-1382	6.81e-09	6.02e-09	5	-2	24.5137	0.986103
	2014-07-22	11:43:00	Pattern1_OLIG@7	662	-2132	6.68e-09	6.01e-09	4	-11	24.1408	0.985892
	2014-07-22	11:47:00	Pattern1_OLIG@8	817	-2010	6.74e-09	6e-09	5	-8	24.0219	0.985665
	2014-07-22	13:15:00	Pattern1_FK2@1	288	-4333	7.12e-09	6e-09	34	33	8.00655	0.98587
	2014-07-22	13:19:00	Pattern1_FK2@2	193	-4511	7.1e-09	6.01e-09	34	27	8.46289	0.985587
	2014-07-22	13:23:00	Pattern1_FK2@3	387	-4520	7e-09	6.02e-09	34	26	7.68781	0.985968
	2014-07-22	13:27:00	Pattern1_FK2@4	1682	-3531	6.87e-09	6.02e-09	28	48	8.61712	0.986323
	2014-07-22	13:31:00	Pattern1_FK2@5	1491	-3726	6.61e-09	6.03e-09	32	45	7.7386	0.985648
	2014-07-22	13:36:00	Pattern1_FK2@6	1638	-3804	6.44e-09	6.01e-09	29	41	7.79905	0.986032
	2014-07-22	13:40:00	Pattern1_FK2@7	3140	-2514	6.24e-09	5.98e-09	12	63	8.03821	0.986529
	2014-07-22	13:44:00	Pattern1_FK2@8	3022	-2441	6.14e-09	5.96e-09	9	63	7.2813	0.986922
	2014-07-22	13:48:00	Pattern1_FK2@9	3040	-2279	6.14e-09	5.99e-09	11	65	6.92877	0.986215
	2014-07-22	15:15:00	Pattern1_BYT@1	-1109	6488	6.7e-09	5.74e-09	75	48	69.9893	0.988106
	2014-07-22	15:23:00	Pattern1_BYT@3	-1036	6349	6.26e-09	5.82e-09	77	45	68.5009	0.988477
	2014-07-22	15:27:00	Pattern1_BYT@4	-492	5107	6.06e-09	5.85e-09	69	19	70.4638	0.987158
	2014-07-22	15:31:00	Pattern1_BYT@5	-288	5108	5.9e-09	5.87e-09	67	18	69.3402	0.987232
	2014-07-22	15:35:00	Pattern1_BYT@6	-398	5300	5.76e-09	5.9e-09	69	22	68.6012	0.987299
	2014-07-22	15:39:00	Pattern1_BYT@7	339	6509	5.65e-09	5.93e-09	70	46	68.4502	0.987393
	2014-07-22	15:43:00	Pattern1_BYT@8	219	6357	5.78e-09	5.95e-09	71	45	70.8508	0.987092
	2014-07-22	15:47:00	Pattern1_BYT@9	423	6304	5.56e-09	5.97e-09	70	43	70.2919	0.987525
	2014-07-22	15:52:00	Pattern1_ALBITE2@1	-7318	3726	5.56e-09	5.99e-09	81	-4	8.98492	0.984447
	2014-07-22	15:56:00	Pattern1_ALBITE2@2	-7537	3738	5.41e-09	6.01e-09	83	-6	9.5174	0.984404
	2014-07-22	16:00:00	Pattern1_ALBITE2@3	-7358	3652	5.4e-09	6.01e-09	82	-5	9.3953	0.984706
	2014-07-22	16:04:00	Pattern1_ALBITE2@4	-8354	3236	5.38e-09	6.01e-09	98	-12	10.8866	0.983517
	2014-07-22	16:08:00	Pattern1_ALBITE2@5	-8325	3062	5.4e-09	6.02e-09	99	-9	10.9583	0.984271
	2014-07-22	16:12:00	Pattern1_ALBITE2@6	-8472	3137	5.4e-09	6.03e-09	103	-13	11.2929	0.983772
	2014-07-22	16:16:00	Pattern1_ALBITE2@7	-7628	2198	5.43e-09	6.02e-09	95	1	3.10738	0.984694
	2014-07-22	16:20:00	Pattern1_ALBITE2@8	-7514	2133	5.65e-09	6e-09	94	3	4.32843	0.984696
	2014-07-22	16:24:00	Pattern1_ALBITE2@9	-7714	2030	5.65e-09	6.15e-09	97	2	1.61378	0.985685
	2014-07-22	18:12:00	Pattern2_AN@1	-9592	1786	6.92e-09	5.83e-09	74	20	96.8983	0.986681
	2014-07-22	18:16:00	Pattern2_AN@2	-9718	1851	6.66e-09	5.81e-09	64	15	95.7066	0.986622
	2014-07-22	18:20:00	Pattern2_AN@3	-9814	1975	6.59e-09	5.79e-09	48	4	97.1982	0.987356
	2014-07-22	18:24:00	Pattern2_AN@4	-9901	2105	6.59e-09	5.74e-09	26	-6	96.8536	0.988683
	2014-07-22	18:29:00	Pattern2_AN@5	-9963	2440	6.55e-09	5.61e-09	-7	-29	97.123	0.990223
	2014-07-22	18:33:00	Pattern2_AN@6	-9771	2440	6.68e-09	5.76e-09	37	-16	95.8621	0.987235
	2014-07-22	18:37:00	Pattern2_AN@7	-9804	2209	6.56e-09	5.76e-09	44	-6	95.5026	0.987371
	2014-07-22	18:41:00	Pattern2_AN@8	-9932	2685	6.53e-09	5.51e-09	-16	-41	95.0991	0.990551
	2014-07-22	18:57:00	Pattern2_LAB2@1	-2056	5682	6.64e-09	5.79e-09	-3	18	54.2863	0.986815
	2014-07-22	19:01:00	Pattern2_LAB2@02	-2040	5929	6.64e-09	5.78e-09	-3	20	52.7287	0.986572
	2014-07-22	19:05:00	Pattern2_LAB2@03	-1836	5893	6.59e-09	5.78e-09	-1	20	54.1358	0.986624
	2014-07-22	19:10:00	Pattern2_LAB2@04	-1869	5587	6.62e-09	5.78e-09	-2	16	53.532	0.98687
	2014-07-22	19:14:00	Pattern2_LAB2@05	-1731	5753	6.56e-09	5.76e-09	-1	18	54.0004	0.986937
	2014-07-22	19:18:00	Pattern2_LAB2@06	-483	5914	6.56e-09	5.76e-09	4	20	55.3335	0.986223
	2014-07-22	19:22:00	Pattern2_LAB2@07	-250	5878	6.42e-09	5.78e-09	4	18	56.6743	0.986801
	2014-07-22	19:26:00	Pattern2_LAB2@08	-176	5658	6.53e-09	5.82e-09	4	17	53.1577	0.986193
	2014-07-22	19:30:00	Pattern2_LAB2@09	-457	5635	6.55e-09	5.86e-09	-2	16	54.4636	0.986002
	2014-07-22	19:34:00	Pattern2_LAB2@10	-346	5782	6.55e-09	5.88e-09	-4	16	55.2	0.986245
	2014-07-22	19:38:00	Pattern2_LAB2@11	1831	5995	6.42e-09	5.89e-09	9	17	55.8728	0.986275
	2014-07-22	19:43:00	Pattern2_LAB2@12	1868	6226	6.42e-09	5.9e-09	12	16	54.6687	0.985881
	2014-07-22	19:47:00	Pattern2_LAB2@13	1319	5936	6.28e-09	5.9e-09	7	19	55.9526	0.986166
	2014-07-22	19:51:00	Pattern2_LAB2@14	1318	5728	5.9e-09	5.89e-09	8	16	54.9634	0.986235
	2014-07-22	19:55:00	Pattern2_LAB2@15	1750	5658	5.72e-09	5.88e-09	9	15	54.7008	0.986317
	2014-07-23	09:57:00	Pattern2_LAB1@2	2274	-3478	6.55e-09	5.75e-09	39	29	59.638	0.984565
	2014-07-23	10:02:00	Pattern2_LAB1@3	2570	-3414	6.33e-09	5.76e-09	42	30	61.9127	0.98448
	2014-07-23	10:06:00	Pattern2_LAB1@4	1661	-4498	6.2e-09	5.78e-09	37	13	63.9435	0.985407
	2014-07-23	10:10:00	Pattern2_LAB1@5	1734	-4279	6.22e-09	5.79e-09	40	16	62.5906	0.985031
	2014-07-23	10:14:00	Pattern2_LAB1@6	1834	-4493	6.26e-09	5.8e-09	40	14	63.0134	0.985368
	2014-07-23	10:18:00	Pattern2_LAB1@7	2402	-4493	6.3e-09	5.81e-09	44	16	64.9273	0.984927
	2014-07-23	10:22:00	Pattern2_LAB1@8	2222	-4562	6.37e-09	5.81e-09	43	14	63.2906	0.985012
	2014-07-23	10:26:00	Pattern2_LAB1@9	2314	-4341	6.46e-09	5.81e-09	43	15	62.7285	0.985079
	2014-07-23	16:36:00	TCCOL1_OLIG@1	-8737	4119	6.08e-09	5.7e-09	-21	-18	21.0594	0.983548
	2014-07-23	16:40:00	TCCOL1_OLIG@2	-8622	4234	5.96e-09	5.7e-09	-20	-17	21.9047	0.984049
	2014-07-23	16:44:00	TCCOL1_OLIG@3	-8579	4047	5.83e-09	5.7e-09	-13	-11	21.4187	0.98355
	2014-07-23	17:26:00	TCCOL1_OLIG@13	-8652	4181	5.41e-09	5.67e-09	-13	-15	20.8741	0.98384
	2014-07-23	17:30:00	TCCOL1_OLIG@14	-8534	4125	5.43e-09	5.7e-09	-11	-10	21.0669	0.984057
	2014-07-23	17:34:00	TCCOL1_OLIG@15	-8685	4054	5.22e-09	5.74e-09	-13	-10	21.8015	0.98343
	2014-07-24	13:35:00	TCBOA12_Olig@1	-2004	6532	6.64e-09	5.98e-09	16	41	21.0376	0.983119
	2014-07-24	13:40:00	TCBOA12_Olig@2	-1936	6610	6.53e-09	5.97e-09	17	42	20.7524	0.983518
	2014-07-24	13:44:00	TCBOA12_Olig@3	-2032	6591	6.55e-09	5.96e-09	16	40	21.3612	0.983684
	2014-07-24	14:37:00	TCBOA12_Olig@16	-2000	6651	5.98e-09	6.26e-09	12	41	20.1727	0.983783
	2014-07-24	14:41:00	TCBOA12_Olig@17	-2060	6663	5.98e-09	6.23e-09	14	41	20.5	0.984086
	2014-07-24	14:45:00	TCBOA12_Olig@18	-1856	6745	6.12e-09	6.2e-09	18	42	20.9026	0.983892
	2014-07-24	16:58:00	CHR50_ANDE@1	-1231	-4926	9.9e-09	5.95e-09	-2	6	53.5454	0.985803
	2014-07-24	17:02:00	CHR50_ANDE@2	-1099	-4875	9.34e-09	5.95e-09	0	4	53.7488	0.986206
	2014-07-24	17:06:00	CHR50_ANDE@3	-1201	-4789	9.34e-09	5.93e-09	-1	5	53.2858	0.985584
	2014-07-24	17:43:00	CHR50_ANDE@12	-1296	-4824	9.03e-09	5.93e-09	0	3	52.0268	0.985943
	2014-07-24	17:47:00	CHR50_ANDE@13	-1276	-4688	8.72e-09	5.95e-09	0	2	53.3709	0.985589
	2014-07-24	17:52:00	CHR50_ANDE@14	-1063	-4800	8.56e-09	5.96e-09	3	1	52.4607	0.986723
	2014-07-25	02:15:00	CHR10_ANDE@86	-2108	7904	6.9e-09	6.09e-09	17	85	48.1629	0.986055
	2014-07-25	02:19:00	CHR10_ANDE@87	-2148	7936	6.81e-09	6.11e-09	14	85	49.4643	0.986912
	2014-07-25	02:23:00	CHR10_ANDE@88	-2160	7852	6.79e-09	6.09e-09	16	80	50.861	0.985789
	2014-07-25	03:09:00	CHR10_ANDE@99	-2174	7882	6.83e-09	5.76e-09	21	82	49.9739	0.986722
	2014-07-25	03:13:00	CHR10_ANDE@100	-2165	7965	6.66e-09	5.73e-09	17	86	47.5991	0.987514
	2014-07-25	03:17:00	CHR10_ANDE@101	-2093	7953	6.66e-09	5.73e-09	20	80	49.1611	0.986859
	2014-07-25	11:25:00	MOR59_OLIG@23	-6517	7624	7.72e-09	6.02e-09	-52	11	21.9845	0.984411
	2014-07-25	11:29:00	MOR59_OLIG@24	-6677	7505	7.36e-09	5.99e-09	-54	33	21.4254	0.983688
	2014-07-25	11:33:00	MOR59_OLIG@25	-6535	7772	7.36e-09	5.99e-09	-49	3	22.3447	0.98475
	2014-07-25	12:02:00	MOR59_OLIG@32	-6606	7733	7.12e-09	5.85e-09	-47	5	21.7491	0.984517
	2014-07-25	12:06:00	MOR59_OLIG@33	-6474	7857	7.16e-09	5.85e-09	-43	2	21.4485	0.98499
	2014-07-25	12:10:00	MOR59_OLIG@34	-6741	7616	7.18e-09	5.85e-09	-46	12	22.0276	0.984734
	2014-07-25	14:08:00	MOR61_Olig@1	5384	5736	6.66e-09	5.92e-09	87	-41	23.3067	0.985722
	2014-07-25	14:13:00	MOR61_Olig@2	5425	5818	6.74e-09	5.91e-09	90	-43	26.4601	0.986043
	2014-07-25	14:17:00	MOR61_Olig@3	5506	5597	6.72e-09	5.89e-09	87	-40	22.5282	0.986446
	2014-07-25	14:54:00	MOR61_Olig@12	5382	5675	6.18e-09	5.83e-09	87	-41	27.1619	0.986077
	2014-07-25	14:58:00	MOR61_Olig@13	5516	5515	6.3e-09	5.82e-09	87	-39	22.1088	0.986538
	2014-07-25	15:02:00	MOR61_Olig@14	5402	5545	6.14e-09	5.8e-09	85	-36	23.1775	0.985879
	2014-07-25	17:24:00	AN-Std@1	1512	1242	5.68e-09	5.77e-09	29	15	96.1644	0.987272
	2014-07-25	17:28:00	AN-Std@2	1415	900	5.66e-09	5.78e-09	25	20	96.8774	0.986648
	2014-07-25	17:32:00	AN-Std@3	1815	901	5.61e-09	5.79e-09	21	15	96.7381	0.986179
	2014-07-25	17:37:00	AN-Std@4	2186	1047	5.63e-09	5.81e-09	19	12	96.591	0.986418
	2014-07-25	17:41:00	AN-Std@5	2614	1473	5.75e-09	5.81e-09	16	10	96.7554	0.986699
	2014-07-25	17:45:00	AN-Std@6	2988	1462	5.66e-09	5.8e-09	16	9	97.0699	0.986283
	2014-07-25	17:49:00	AN-Std@7	2809	1121	5.61e-09	5.8e-09	15	12	96.3024	0.986342
	2014-07-25	17:53:00	AN-Std@8	2834	789	5.63e-09	5.81e-09	14	13	96.5242	0.986297
	2014-07-25	17:57:00	AN-Std@9	2540	504	5.43e-09	5.81e-09	15	14	96.4817	0.986687
	2014-07-25	18:01:00	AN-Std@10	2309	-250	5.47e-09	5.79e-09	13	14	96.9345	0.986434
3	FITTED MODEL:
	ANOVA results and summary statistics of the plagioclase model
		DG	SS	MS	F	Coeff.	VIF	p-value
	Source
	Model	15	0.000197	1.3e-05	65.22	_	_	0
	Linear	7	9.1e-05	1.3e-05	64.64	_	_	0
	Interaction	5	7.7e-05	1.5e-05	76.11	_	_	0
	Square	3	3.1e-05	1e-05	51.38	_	_	0
	Terms
	Constant					0.985444		0
	X	1	2e-06	2e-06	7.83	-0.000296	1.94	0.006
	Y	1	0	0	0.41	-6.4e-05	2.36	0.524
	CP	1	4e-06	4e-06	20.55	-0.000848	4.27	0
	PI	1	0	0	0	1.9e-05	6.08	0.949
	LT1defX	1	1e-06	1e-06	6.64	-0.000442	4.09	0.011
	LT1defY	1	0	0	0.07	4.5e-05	2.97	0.79
	An	1	3.4e-05	3.4e-05	166.68	0.001639	3.46	0
	X2	1	2.5e-05	2.5e-05	123.33	-0.002366	2.77	0
	LT1defX2	1	1.4e-05	1.4e-05	69.81	0.002516	4.18	0
	LT1defY2	1	8e-06	8e-06	37.9	0.001339	2.14	0
	X × An	1	1.7e-05	1.7e-05	86.27	-0.002039	4.16	0
	Y × PI	1	1e-06	1e-06	5.5	-0.001028	5.4	0.021
	Y × An	1	2e-06	2e-06	11.68	0.001182	6.5	0.001
	LT1defX × LT1defY	1	1e-06	1e-06	6.91	0.001058	5.39	0.01
	LT1defX × An	1	8e-06	8e-06	40.45	-0.001465	2.85	0
	Error	103	2.1e-05	0
	Total	118	0.000217
	Summary statistics		S	PRESS	R2	Adj-R2	Pred-R2	A.P.
			0.0004484	2.88e-05	0.9047	0.8909	0.8674	46.6
4
	RESULTS:
		Fitted		Standardized	Leverage	Cook	Predicted	Predicted
	Label	IMF	Residuals	Residual	Hi	Distance	IMF	IMF 1σ
	Pattern1_Ande003@3	0.984775	-0.000790637	-1.85511	0.0964185	0.0229515	0.984775	0.0001392
	Pattern1_Ande001@1	0.98456	-0.000491067	-1.15153	0.0953502	0.0087352	0.98456	0.0001384
	Pattern1_Ande002@2	0.984602	-0.000405271	-0.94974	0.0941983	0.00586272	0.984602	0.0001376
	Pattern1_Ande@4	0.984524	0.000206595	0.491053	0.119493	0.00204525	0.984524	0.000155
	Pattern1_Ande@5	0.984558	0.000369467	0.879113	0.121358	0.00667151	0.984558	0.0001562
	Pattern1_Ande@6	0.984531	0.000311982	0.744133	0.125601	0.00497126	0.984531	0.0001589
	Pattern1_Ande@7	0.984323	0.000111115	0.26713	0.139295	0.000721785	0.984323	0.0001673
	Pattern1_Ande@9	0.983989	6.99155e-05	0.173072	0.188211	0.000434047	0.983989	0.0001945
	Pattern1_OLIG@1	0.98582	-0.000868582	-2.02051	0.080716	0.0224033	0.98582	0.0001274
	Pattern1_OLIG@2	0.985709	-0.00109475	-2.54505	0.079565	0.0349946	0.985709	0.0001265
	Pattern1_OLIG@3	0.985613	-0.000442653	-1.01847	0.0603119	0.00416096	0.985613	0.0001101
	Pattern1_OLIG@4	0.985653	-0.000384731	-0.887819	0.0658531	0.00347288	0.985653	0.0001151
	Pattern1_OLIG@5	0.985688	0.000163869	0.37951	0.0725373	0.000704031	0.985688	0.0001208
	Pattern1_OLIG@6	0.985736	0.000367376	0.852358	0.075882	0.00372851	0.985736	0.0001235
	Pattern1_OLIG@7	0.986085	-0.000192656	-0.45659	0.114351	0.00168232	0.986085	0.0001516
	Pattern1_OLIG@8	0.985931	-0.000265992	-0.621319	0.0882884	0.00233645	0.985931	0.0001332
	Pattern1_FK2@1	0.985861	8.52459e-06	0.0202617	0.119464	3.48113e-06	0.985861	0.000155
	Pattern1_FK2@2	0.985878	-0.00029027	-0.689531	0.118448	0.0039927	0.985878	0.0001543
	Pattern1_FK2@3	0.98595	1.77025e-05	0.0418772	0.111079	1.36964e-05	0.98595	0.0001494
	Pattern1_FK2@4	0.985955	0.000368329	0.860331	0.0882148	0.00447569	0.985955	0.0001332
	Pattern1_FK2@5	0.986146	-0.000497683	-1.17019	0.100211	0.00953168	0.986146	0.0001419
	Pattern1_FK2@6	0.986055	-2.28139e-05	-0.0535306	0.09646	1.91198e-05	0.986055	0.0001393
	Pattern1_FK2@7	0.985894	0.000635544	1.54656	0.159941	0.0284618	0.985894	0.0001793
	Pattern1_FK2@8	0.985866	0.00105593	2.59325	0.175226	0.0892961	0.985866	0.0001877
	Pattern1_FK2@9	0.985945	0.000269468	0.661007	0.173286	0.00572402	0.985945	0.0001866
	Pattern1_BYT@1	0.987956	0.000149766	0.374666	0.205141	0.00226429	0.987956	0.0002031
	Pattern1_BYT@3	0.987865	0.000611703	1.5	0.172724	0.0293606	0.987865	0.0001863
	Pattern1_BYT@4	0.987058	9.93861e-05	0.233624	0.0997444	0.000377954	0.987058	0.0001416
	Pattern1_BYT@5	0.986968	0.000264085	0.616648	0.0876489	0.00228318	0.986968	0.0001327
	Pattern1_BYT@6	0.987066	0.000232911	0.543192	0.0854142	0.00172224	0.987066	0.000131
	Pattern1_BYT@7	0.987418	-2.48849e-05	-0.0597362	0.136729	3.53238e-05	0.987418	0.0001658
	Pattern1_BYT@8	0.987421	-0.000329217	-0.79333	0.14334	0.00658182	0.987421	0.0001697
	Pattern1_BYT@9	0.987317	0.000207879	0.499562	0.138622	0.00251013	0.987317	0.0001669
	Pattern1_ALBITE2@1	0.983955	0.000492485	1.15031	0.0881784	0.0079976	0.983955	0.0001331
	Pattern1_ALBITE2@2	0.984007	0.000396989	0.927156	0.0879865	0.00518324	0.984007	0.000133
	Pattern1_ALBITE2@3	0.984065	0.000640382	1.49347	0.0853914	0.0130153	0.984065	0.000131
	Pattern1_ALBITE2@4	0.98461	-0.00109329	-2.60462	0.123541	0.0597649	0.98461	0.0001576
	Pattern1_ALBITE2@5	0.984704	-0.000432527	-1.03067	0.123928	0.0093917	0.984704	0.0001578
	Pattern1_ALBITE2@6	0.984885	-0.00111353	-2.69578	0.151239	0.0809331	0.984885	0.0001744
	Pattern1_ALBITE2@7	0.984702	-8.11739e-06	-0.0195187	0.139632	3.86437e-06	0.984702	0.0001675
	Pattern1_ALBITE2@8	0.984699	-2.17082e-06	-0.00520822	0.135792	2.66387e-07	0.984699	0.0001652
	Pattern1_ALBITE2@9	0.984668	0.00101704	2.5205	0.190063	0.0931754	0.984668	0.0001955
	Pattern2_AN@1	0.987198	-0.00051701	-1.33304	0.25172	0.037361	0.987198	0.0002249
	Pattern2_AN@2	0.98705	-0.00042787	-1.07102	0.20607	0.0186082	0.98705	0.0002035
	Pattern2_AN@3	0.987192	0.000163713	0.402376	0.176519	0.00216911	0.987192	0.0001884
	Pattern2_AN@4	0.987705	0.00097866	2.37232	0.153422	0.0637455	0.987705	0.0001756
	Pattern2_AN@5	0.989953	0.000269258	0.731229	0.325502	0.0161272	0.989953	0.0002558
	Pattern2_AN@6	0.987614	-0.000379994	-0.927964	0.165852	0.0107009	0.987614	0.0001826
	Pattern2_AN@7	0.987281	8.9547e-05	0.218244	0.162529	0.000577729	0.987281	0.0001808
	Pattern2_AN@8	0.990996	-0.000444446	-1.48553	0.554728	0.17183	0.990996	0.0003339
	Pattern2_LAB2@1	0.986709	0.000106272	0.246231	0.073377	0.000300071	0.986709	0.0001215
	Pattern2_LAB2@02	0.986624	-5.12392e-05	-0.11892	0.076481	7.31976e-05	0.986624	0.000124
	Pattern2_LAB2@03	0.98667	-4.59397e-05	-0.106545	0.0751721	5.76691e-05	0.98667	0.0001229
	Pattern2_LAB2@04	0.986663	0.000207091	0.479185	0.0708868	0.00109492	0.986663	0.0001194
	Pattern2_LAB2@05	0.98671	0.00022677	0.526515	0.0772156	0.00144979	0.98671	0.0001246
	Pattern2_LAB2@06	0.986564	-0.000341144	-0.791666	0.0762773	0.00323458	0.986564	0.0001238
	Pattern2_LAB2@07	0.986631	0.00016942	0.391183	0.0669192	0.000685916	0.986631	0.000116
	Pattern2_LAB2@08	0.98632	-0.000127188	-0.291863	0.0553228	0.000311788	0.98632	0.0001055
	Pattern2_LAB2@09	0.986521	-0.000518679	-1.19044	0.0556411	0.00521856	0.986521	0.0001058
	Pattern2_LAB2@10	0.98658	-0.000335011	-0.770532	0.0596547	0.00235407	0.98658	0.0001095
	Pattern2_LAB2@11	0.985872	0.000403123	0.925387	0.0559839	0.00317402	0.985872	0.0001061
	Pattern2_LAB2@12	0.985739	0.000142315	0.327546	0.0609111	0.000434925	0.985739	0.0001107
	Pattern2_LAB2@13	0.986067	9.88819e-05	0.226419	0.0512315	0.000173014	0.986067	0.0001015
	Pattern2_LAB2@14	0.98617	6.45659e-05	0.14769	0.0492728	7.06535e-05	0.98617	9.95e-05
	Pattern2_LAB2@15	0.986123	0.000194241	0.445309	0.0535283	0.000700936	0.986123	0.0001037
	Pattern2_LAB1@2	0.985019	-0.000453256	-1.11619	0.179722	0.0170607	0.985019	0.0001901
	Pattern2_LAB1@3	0.985033	-0.00055274	-1.33176	0.143076	0.0185079	0.985033	0.0001696
	Pattern2_LAB1@4	0.985223	0.000184042	0.437401	0.119301	0.00161978	0.985223	0.0001549
	Pattern2_LAB1@5	0.985245	-0.000214091	-0.504895	0.105569	0.00188049	0.985245	0.0001457
	Pattern2_LAB1@6	0.985206	0.000162247	0.380945	0.097644	0.000981459	0.985206	0.0001401
	Pattern2_LAB1@7	0.98502	-9.2808e-05	-0.217818	0.0969043	0.000318183	0.98502	0.0001396
	Pattern2_LAB1@8	0.985068	-5.62302e-05	-0.131631	0.0922323	0.000110028	0.985068	0.0001362
	Pattern2_LAB1@9	0.98503	4.99671e-05	0.116733	0.0885482	8.27392e-05	0.98503	0.0001334
	TCCOL1_OLIG@1	0.983813	-0.000264419	-0.647352	0.170042	0.00536612	0.983813	0.0001849
	TCCOL1_OLIG@2	0.983927	0.000122582	0.297094	0.153139	0.000997565	0.983927	0.0001755
	TCCOL1_OLIG@3	0.983524	2.5537e-05	0.0619064	0.153518	4.34403e-05	0.983524	0.0001757
	TCCOL1_OLIG@13	0.983728	0.000112096	0.273418	0.163857	0.000915625	0.983728	0.0001815
	TCCOL1_OLIG@14	0.983568	0.000489151	1.18058	0.14602	0.0148947	0.983568	0.0001713
	TCCOL1_OLIG@15	0.983653	-0.000222904	-0.535499	0.138077	0.00287112	0.983653	0.0001666
	TCBOA12_Olig@1	0.984003	-0.000883871	-2.11107	0.127986	0.0408813	0.984003	0.0001604
	TCBOA12_Olig@2	0.98406	-0.000541282	-1.30066	0.138476	0.0169949	0.98406	0.0001668
	TCBOA12_Olig@3	0.984073	-0.000388968	-0.931368	0.132367	0.00827117	0.984073	0.0001631
	TCBOA12_Olig@16	0.98357	0.000213609	0.532669	0.200025	0.00443408	0.98357	0.0002005
	TCBOA12_Olig@17	0.983642	0.000443662	1.09508	0.183487	0.0168428	0.983642	0.0001921
	TCBOA12_Olig@18	0.983713	0.000178837	0.43917	0.175103	0.0025588	0.983713	0.0001876
	CHR50_ANDE@1	0.98551	0.000293644	0.722477	0.178242	0.00707611	0.98551	0.0001893
	CHR50_ANDE@2	0.985675	0.000531463	1.27804	0.139781	0.0165885	0.985675	0.0001676
	CHR50_ANDE@3	0.985631	-4.70736e-05	-0.112974	0.136332	0.000125918	0.985631	0.0001655
	CHR50_ANDE@12	0.985725	0.000218245	0.518617	0.119066	0.00227205	0.985725	0.0001547
	CHR50_ANDE@13	0.985931	-0.000342237	-0.811151	0.114471	0.00531591	0.985931	0.0001517
	CHR50_ANDE@14	0.985917	0.000806115	1.91645	0.119862	0.0312613	0.985917	0.0001552
	CHR10_ANDE@86	0.986307	-0.000251314	-0.643765	0.241894	0.00826476	0.986307	0.0002205
	CHR10_ANDE@87	0.986367	0.000545019	1.42805	0.275419	0.048448	0.986367	0.0002353
	CHR10_ANDE@88	0.986337	-0.000547519	-1.38039	0.217392	0.0330814	0.986337	0.000209
	CHR10_ANDE@99	0.98722	-0.000498363	-1.24322	0.200633	0.0242456	0.98722	0.0002008
	CHR10_ANDE@100	0.987357	0.000156615	0.408104	0.267382	0.00379906	0.987357	0.0002318
	CHR10_ANDE@101	0.987235	-0.000375334	-0.94685	0.218329	0.0156505	0.987235	0.0002095
	MOR59_OLIG@23	0.984208	0.000202923	0.504649	0.195671	0.00387213	0.984208	0.0001983
	MOR59_OLIG@24	0.984082	-0.000394533	-1.09608	0.355487	0.0414151	0.984082	0.0002673
	MOR59_OLIG@25	0.984441	0.000309352	0.752594	0.159502	0.00671787	0.984441	0.0001791
	MOR59_OLIG@32	0.984632	-0.000114466	-0.277281	0.152265	0.000863099	0.984632	0.000175
	MOR59_OLIG@33	0.984483	0.000506328	1.21234	0.132306	0.0140069	0.984483	0.0001631
	MOR59_OLIG@34	0.984381	0.000353614	0.852264	0.143627	0.00761382	0.984381	0.0001699
	MOR61_Olig@1	0.985864	-0.00014145	-0.344873	0.163165	0.0014494	0.985864	0.0001811
	MOR61_Olig@2	0.985989	5.42503e-05	0.134885	0.195317	0.00027601	0.985989	0.0001982
	MOR61_Olig@3	0.98585	0.00059598	1.44822	0.157545	0.0245136	0.98585	0.000178
	MOR61_Olig@12	0.986174	-9.72592e-05	-0.237626	0.166656	0.000705772	0.986174	0.000183
	MOR61_Olig@13	0.986102	0.000436596	1.06523	0.164354	0.0139485	0.986102	0.0001818
	MOR61_Olig@14	0.986061	-0.000181124	-0.440506	0.15899	0.00229273	0.986061	0.0001788
	AN-Std@1	0.986588	0.000684045	1.5784	0.0656988	0.0109492	0.986588	0.0001149
	AN-Std@2	0.986663	-1.52443e-05	-0.0352133	0.0677063	5.6282e-06	0.986663	0.0001167
	AN-Std@3	0.986618	-0.000439557	-1.01957	0.0754214	0.0052999	0.986618	0.0001231
	AN-Std@4	0.986544	-0.000125899	-0.293517	0.0847697	0.000498719	0.986544	0.0001305
	AN-Std@5	0.986489	0.000209654	0.48987	0.0888335	0.00146225	0.986489	0.0001336
	AN-Std@6	0.986337	-5.37291e-05	-0.126132	0.0973443	0.00010723	0.986337	0.0001399
	AN-Std@7	0.986375	-3.35135e-05	-0.0784215	0.0915109	3.87171e-05	0.986375	0.0001356
	AN-Std@8	0.98632	-2.35382e-05	-0.0553311	0.0997611	2.12042e-05	0.98632	0.0001416
	AN-Std@9	0.986445	0.000242119	0.573555	0.113538	0.00263336	0.986445	0.0001511
	AN-Std@10	0.986452	-1.79087e-05	-0.042763	0.127541	1.67078e-05	0.986452	0.0001601

## Sheet: 2.K-feldspar model
	2.K-feldspar Response Surface Model
	From row 4 to 414
1	MODEL DESIGN:
	Central Composite Design
	Factors:		8		Cube points:		128
	Base runs:		154		Center points in cube:		10
	Base blocks:		1		Axial points:		16
	Replicates:		1		Center points in axial:		0
	Total runs:		154		α		3.36359
	Total blocks:		1		Two-level factorial: Half fraction
					design matrix
	StdOrder	RunOrder	PtType	Blocks	A	B	C	D	E	F	G	H
	8	1	1	1	1	1	1	-1	-1	-1	-1	1
	70	2	1	1	1	-1	1	-1	-1	-1	1	1
	91	3	1	1	-1	1	-1	1	1	-1	1	-1
	3	4	1	1	-1	1	-1	-1	-1	-1	-1	1
	75	5	1	1	-1	1	-1	1	-1	-1	1	1
	107	6	1	1	-1	1	-1	1	-1	1	1	-1
	151	7	0	1	0	0	0	0	0	0	0	0
	16	8	1	1	1	1	1	1	-1	-1	-1	-1
	21	9	1	1	-1	-1	1	-1	1	-1	-1	-1
	92	10	1	1	1	1	-1	1	1	-1	1	1
	86	11	1	1	1	-1	1	-1	1	-1	1	-1
	101	12	1	1	-1	-1	1	-1	-1	1	1	1
	83	13	1	1	-1	1	-1	-1	1	-1	1	1
	150	14	0	1	0	0	0	0	0	0	0	0
	100	15	1	1	1	1	-1	-1	-1	1	1	-1
	11	16	1	1	-1	1	-1	1	-1	-1	-1	-1
	149	17	0	1	0	0	0	0	0	0	0	0
	94	18	1	1	1	-1	1	1	1	-1	1	1
	18	19	1	1	1	-1	-1	-1	1	-1	-1	-1
	65	20	1	1	-1	-1	-1	-1	-1	-1	1	1
	145	21	0	1	0	0	0	0	0	0	0	0
	62	22	1	1	1	-1	1	1	1	1	-1	1
	51	23	1	1	-1	1	-1	-1	1	1	-1	1
	87	24	1	1	-1	1	1	-1	1	-1	1	-1
	140	25	-1	1	0	0	0	0	0	3.36359	0	0
	89	26	1	1	-1	-1	-1	1	1	-1	1	1
	74	27	1	1	1	-1	-1	1	-1	-1	1	1
	130	28	-1	1	3.36359	0	0	0	0	0	0	0
	61	29	1	1	-1	-1	1	1	1	1	-1	-1
	45	30	1	1	-1	-1	1	1	-1	1	-1	1
	34	31	1	1	1	-1	-1	-1	-1	1	-1	-1
	77	32	1	1	-1	-1	1	1	-1	-1	1	1
	114	33	1	1	1	-1	-1	-1	1	1	1	-1
	39	34	1	1	-1	1	1	-1	-1	1	-1	1
	99	35	1	1	-1	1	-1	-1	-1	1	1	1
	128	36	1	1	1	1	1	1	1	1	1	1
	4	37	1	1	1	1	-1	-1	-1	-1	-1	-1
	63	38	1	1	-1	1	1	1	1	1	-1	1
	146	39	0	1	0	0	0	0	0	0	0	0
	6	40	1	1	1	-1	1	-1	-1	-1	-1	-1
	14	41	1	1	1	-1	1	1	-1	-1	-1	1
	27	42	1	1	-1	1	-1	1	1	-1	-1	1
	122	43	1	1	1	-1	-1	1	1	1	1	1
	131	44	-1	1	0	-3.36359	0	0	0	0	0	0
	19	45	1	1	-1	1	-1	-1	1	-1	-1	-1
	108	46	1	1	1	1	-1	1	-1	1	1	1
	73	47	1	1	-1	-1	-1	1	-1	-1	1	-1
	135	48	-1	1	0	0	0	-3.36359	0	0	0	0
	69	49	1	1	-1	-1	1	-1	-1	-1	1	-1
	153	50	0	1	0	0	0	0	0	0	0	0
	84	51	1	1	1	1	-1	-1	1	-1	1	-1
	31	52	1	1	-1	1	1	1	1	-1	-1	-1
	133	53	-1	1	0	0	-3.36359	0	0	0	0	0
	24	54	1	1	1	1	1	-1	1	-1	-1	-1
	139	55	-1	1	0	0	0	0	0	-3.36359	0	0
	81	56	1	1	-1	-1	-1	-1	1	-1	1	-1
	144	57	-1	1	0	0	0	0	0	0	0	3.36359
	123	58	1	1	-1	1	-1	1	1	1	1	1
	98	59	1	1	1	-1	-1	-1	-1	1	1	1
	29	60	1	1	-1	-1	1	1	1	-1	-1	1
	49	61	1	1	-1	-1	-1	-1	1	1	-1	-1
	15	62	1	1	-1	1	1	1	-1	-1	-1	1
	152	63	0	1	0	0	0	0	0	0	0	0
	78	64	1	1	1	-1	1	1	-1	-1	1	-1
	116	65	1	1	1	1	-1	-1	1	1	1	1
	28	66	1	1	1	1	-1	1	1	-1	-1	-1
	7	67	1	1	-1	1	1	-1	-1	-1	-1	-1
	25	68	1	1	-1	-1	-1	1	1	-1	-1	-1
	37	69	1	1	-1	-1	1	-1	-1	1	-1	-1
	1	70	1	1	-1	-1	-1	-1	-1	-1	-1	-1
	129	71	-1	1	-3.36359	0	0	0	0	0	0	0
	111	72	1	1	-1	1	1	1	-1	1	1	1
	102	73	1	1	1	-1	1	-1	-1	1	1	-1
	56	74	1	1	1	1	1	-1	1	1	-1	1
	90	75	1	1	1	-1	-1	1	1	-1	1	-1
	47	76	1	1	-1	1	1	1	-1	1	-1	-1
	138	77	-1	1	0	0	0	0	3.36359	0	0	0
	121	78	1	1	-1	-1	-1	1	1	1	1	-1
	60	79	1	1	1	1	-1	1	1	1	-1	1
	124	80	1	1	1	1	-1	1	1	1	1	-1
	20	81	1	1	1	1	-1	-1	1	-1	-1	1
	147	82	0	1	0	0	0	0	0	0	0	0
	117	83	1	1	-1	-1	1	-1	1	1	1	-1
	22	84	1	1	1	-1	1	-1	1	-1	-1	1
	35	85	1	1	-1	1	-1	-1	-1	1	-1	-1
	17	86	1	1	-1	-1	-1	-1	1	-1	-1	1
	125	87	1	1	-1	-1	1	1	1	1	1	1
	148	88	0	1	0	0	0	0	0	0	0	0
	55	89	1	1	-1	1	1	-1	1	1	-1	-1
	52	90	1	1	1	1	-1	-1	1	1	-1	-1
	120	91	1	1	1	1	1	-1	1	1	1	-1
	30	92	1	1	1	-1	1	1	1	-1	-1	-1
	66	93	1	1	1	-1	-1	-1	-1	-1	1	-1
	33	94	1	1	-1	-1	-1	-1	-1	1	-1	1
	136	95	-1	1	0	0	0	3.36359	0	0	0	0
	104	96	1	1	1	1	1	-1	-1	1	1	1
	40	97	1	1	1	1	1	-1	-1	1	-1	-1
	48	98	1	1	1	1	1	1	-1	1	-1	1
	53	99	1	1	-1	-1	1	-1	1	1	-1	1
	88	100	1	1	1	1	1	-1	1	-1	1	1
	103	101	1	1	-1	1	1	-1	-1	1	1	-1
	127	102	1	1	-1	1	1	1	1	1	1	-1
	96	103	1	1	1	1	1	1	1	-1	1	-1
	43	104	1	1	-1	1	-1	1	-1	1	-1	1
	154	105	0	1	0	0	0	0	0	0	0	0
	50	106	1	1	1	-1	-1	-1	1	1	-1	1
	141	107	-1	1	0	0	0	0	0	0	-3.36359	0
	105	108	1	1	-1	-1	-1	1	-1	1	1	1
	38	109	1	1	1	-1	1	-1	-1	1	-1	1
	67	110	1	1	-1	1	-1	-1	-1	-1	1	-1
	76	111	1	1	1	1	-1	1	-1	-1	1	-1
	64	112	1	1	1	1	1	1	1	1	-1	-1
	26	113	1	1	1	-1	-1	1	1	-1	-1	1
	142	114	-1	1	0	0	0	0	0	0	3.36359	0
	137	115	-1	1	0	0	0	0	-3.36359	0	0	0
	143	116	-1	1	0	0	0	0	0	0	0	-3.36359
	109	117	1	1	-1	-1	1	1	-1	1	1	-1
	95	118	1	1	-1	1	1	1	1	-1	1	1
	112	119	1	1	1	1	1	1	-1	1	1	-1
	68	120	1	1	1	1	-1	-1	-1	-1	1	1
	82	121	1	1	1	-1	-1	-1	1	-1	1	1
	59	122	1	1	-1	1	-1	1	1	1	-1	-1
	46	123	1	1	1	-1	1	1	-1	1	-1	-1
	126	124	1	1	1	-1	1	1	1	1	1	-1
	118	125	1	1	1	-1	1	-1	1	1	1	1
	12	126	1	1	1	1	-1	1	-1	-1	-1	1
	97	127	1	1	-1	-1	-1	-1	-1	1	1	-1
	79	128	1	1	-1	1	1	1	-1	-1	1	-1
	2	129	1	1	1	-1	-1	-1	-1	-1	-1	1
	93	130	1	1	-1	-1	1	1	1	-1	1	-1
	72	131	1	1	1	1	1	-1	-1	-1	1	-1
	32	132	1	1	1	1	1	1	1	-1	-1	1
	110	133	1	1	1	-1	1	1	-1	1	1	1
	71	134	1	1	-1	1	1	-1	-1	-1	1	1
	5	135	1	1	-1	-1	1	-1	-1	-1	-1	1
	119	136	1	1	-1	1	1	-1	1	1	1	1
	58	137	1	1	1	-1	-1	1	1	1	-1	-1
	85	138	1	1	-1	-1	1	-1	1	-1	1	1
	41	139	1	1	-1	-1	-1	1	-1	1	-1	-1
	10	140	1	1	1	-1	-1	1	-1	-1	-1	-1
	13	141	1	1	-1	-1	1	1	-1	-1	-1	-1
	57	142	1	1	-1	-1	-1	1	1	1	-1	1
	36	143	1	1	1	1	-1	-1	-1	1	-1	1
	113	144	1	1	-1	-1	-1	-1	1	1	1	1
	80	145	1	1	1	1	1	1	-1	-1	1	1
	134	146	-1	1	0	0	3.36359	0	0	0	0	0
	132	147	-1	1	0	3.36359	0	0	0	0	0	0
	9	148	1	1	-1	-1	-1	1	-1	-1	-1	1
	23	149	1	1	-1	1	1	-1	1	-1	-1	1
	106	150	1	1	1	-1	-1	1	-1	1	1	-1
	44	151	1	1	1	1	-1	1	-1	1	-1	-1
	42	152	1	1	1	-1	-1	1	-1	1	-1	1
	115	153	1	1	-1	1	-1	-1	1	1	1	-1
	54	154	1	1	1	-1	1	-1	1	1	-1	-1
2	INPUT AND OUTPUT VARIABLES:
				INPUTS								OUTPUT
	Date	Hour	Label	X	Y	CP	PI	LT1defX	LT1defY	Or	BaO	IMF
	2014-07-22	12:38:00	Pattern1_ALBITE1@1	-1700	-5959	7.59e-09	5.93e-09	23	-17	91.2935	0.6224	0.984387
	2014-07-22	12:42:00	Pattern1_ALBITE1@2	-1607	-5923	7.4e-09	5.93e-09	25	-16	89.2373	0.7712	0.985607
	2014-07-22	12:46:00	Pattern1_ALBITE1@3	-1500	-5893	7.36e-09	5.93e-09	28	-17	88.9436	0.7072	0.9864
	2014-07-22	12:50:00	Pattern1_ALBITE1@4	-3447	-5178	7.29e-09	5.93e-09	14	25	89.9382	0.821	0.985232
	2014-07-22	12:54:00	Pattern1_ALBITE1@5	-3649	-5260	7.12e-09	5.92e-09	13	24	90.4026	0.6768	0.985432
	2014-07-22	12:58:00	Pattern1_ALBITE1@6	-3328	-5230	7.04e-09	5.93e-09	18	23	90.373	0.7119	0.984858
	2014-07-22	13:03:00	Pattern1_ALBITE1@7	-2498	-5758	7.04e-09	5.95e-09	11	-5	90.5484	0.9853	0.984429
	2014-07-22	13:07:00	Pattern1_ALBITE1@8	-2498	-5894	6.95e-09	5.98e-09	12	-10	89.9086	0.915	0.984902
	2014-07-22	13:11:00	Pattern1_ALBITE1@9	-2349	-5929	7.12e-09	5.99e-09	15	-11	91.2745	0.9895	0.98478
	2014-07-22	14:37:00	Pattern1_FK1@1	-3639	7553	6.46e-09	6.06e-09	60	47	93.1471	0	0.983954
	2014-07-22	14:42:00	Pattern1_FK1@2	-3479	7541	6.61e-09	6.08e-09	59	49	94.4548	0.124	0.98477
	2014-07-22	14:46:00	Pattern1_FK1@3	-3384	7417	6.61e-09	6.08e-09	62	47	93.6483	0.0206	0.984119
	2014-07-22	14:50:00	Pattern1_FK1@4	-5903	7198	6.61e-09	6.07e-09	50	9	94.4576	0.0465	0.984289
	2014-07-22	14:54:00	Pattern1_FK1@5	-5724	7116	6.51e-09	6.02e-09	51	12	93.9637	0.0621	0.983816
	2014-07-22	14:58:00	Pattern1_FK1@6	-5519	7072	6.55e-09	5.93e-09	50	11	94.5665	0.1292	0.98368
	2014-07-22	15:02:00	Pattern1_FK1@7	-5449	8632	6.51e-09	5.81e-09	20	42	95.361	0	0.983372
	2014-07-22	15:06:00	Pattern1_FK1@8	-5563	8599	6.83e-09	5.71e-09	14	38	94.0438	0.0517	0.98403
	2014-07-22	15:10:00	Pattern1_FK1@9	-5449	8528	6.72e-09	5.69e-09	23	45	94.6024	0	0.983247
	2014-07-23	11:39:00	TCSAU020_FK1@1	-8538	126	6.85e-09	5.77e-09	14	31	91.9531	0.0451	0.983816
	2014-07-23	11:43:00	TCSAU020_FK1@2	-8606	-18	6.74e-09	5.78e-09	13	31	92.7174	0.1152	0.984477
	2014-07-23	11:47:00	TCSAU020_FK1@3	-8656	67	6.53e-09	5.77e-09	15	34	92.1367	0.1202	0.984087
	2014-07-23	12:28:00	TCSAU020_FK1@13	-8434	107	6.18e-09	5.78e-09	21	25	90.975	0.0901	0.984308
	2014-07-23	12:32:00	TCSAU020_FK1@14	-8393	29	5.96e-09	5.81e-09	18	27	92.9717	0.0951	0.983889
	2014-07-23	12:36:00	TCSAU020_FK1@15	-8509	-50	5.99e-09	5.85e-09	13	29	91.7992	0.0451	0.98415
	2014-07-23	12:40:00	TCSAU020_AB1@16	-3943	-5841	6.14e-09	5.86e-09	-37	-37	90.3926	1.0863	0.984977
	2014-07-23	12:44:00	TCSAU020_AB1@17	-3767	-5906	6.3e-09	5.87e-09	-36	-42	90.3358	1.13	0.985264
	2014-07-23	12:48:00	TCSAU020_AB1@18	-3958	-6065	6.18e-09	5.87e-09	-40	-45	89.7796	0.9368	0.984839
	2014-07-23	13:38:00	TCSAU020_AB1@30	-3861	-5873	6.22e-09	5.83e-09	-29	-37	90.1099	1.1056	0.985359
	2014-07-23	13:42:00	TCSAU020_AB1@31	-3892	-6068	6.24e-09	5.82e-09	-33	-44	90.8861	1.17	0.985543
	2014-07-23	13:46:00	TCSAU020_AB1@32	-3928	-6137	6.14e-09	5.82e-09	-33	-47	89.4232	1.21	0.984829
	2014-07-23	20:21:00	TCBOA2_AB1@1	-7504	5496	1.02e-08	5.69e-09	-74	-54	89.0809	0.8964	0.98269
	2014-07-23	20:25:00	TCBOA2_AB1@2	-7560	5606	9.34e-09	5.68e-09	-81	-61	88.9057	0.9516	0.983181
	2014-07-23	20:29:00	TCBOA2_AB1@3	-7444	5599	9.24e-09	5.69e-09	-69	-58	88.3906	0.8671	0.982227
	2014-07-23	22:57:00	TCBOA2_AB1@39	-7434	5492	8.9e-09	5.62e-09	-59	-52	88.8597	0.8068	0.983784
	2014-07-23	23:01:00	TCBOA2_AB1@40	-7471	5432	8.34e-09	5.61e-09	-61	-49	89.994	0.9807	0.984433
	2014-07-23	23:05:00	TCBOA2_AB1@41	-7484	5570	7.99e-09	5.59e-09	-69	-55	89.1252	0.902	0.98487
	2014-07-23	23:10:00	TCBOA2_FK1@42	-19	7103	8.16e-09	5.6e-09	53	30	94.3673	0.055	0.984164
	2014-07-23	23:14:00	TCBOA2_FK1@43	-3	7285	8.48e-09	5.63e-09	51	34	91.3026	0.01	0.984264
	2014-07-23	23:18:00	TCBOA2_FK1@44	-123	7324	8.67e-09	5.68e-09	49	34	92.9039	0.06	0.983249
	2014-07-23	23:22:00	TCBOA2_FK1@45	-53	7369	8.58e-09	5.72e-09	47	33	93.63	0.04	0.983976
	2014-07-23	23:26:00	TCBOA2_FK1@46	-236	7249	8.46e-09	5.74e-09	43	32	94.375	0.1	0.983492
	2014-07-24	00:52:00	TCBOA2_FK1@67	-60	7296	8.2e-09	5.7e-09	49	31	93.79	0.05	0.984456
	2014-07-24	00:56:00	TCBOA2_FK1@68	-130	7375	8.2e-09	5.68e-09	48	32	93.49	0.02	0.984535
	2014-07-24	01:01:00	TCBOA2_FK1@69	-207	7442	8.16e-09	5.67e-09	46	33	93.2091	0.035	0.984274
	2014-07-24	01:05:00	TCBOA2_FK1@70	-360	7350	8.16e-09	5.66e-09	46	33	93.6161	0.0747	0.983969
	2014-07-24	11:53:00	TCCOL1_FK1@32	4050	7896	5.7e-09	6.04e-09	43	53	92.5844	0.045	0.983741
	2014-07-24	11:57:00	TCCOL1_FK1@33	4102	8075	5.72e-09	6.03e-09	46	55	93.2924	0.05	0.983944
	2014-07-24	12:01:00	TCCOL1_FK1@34	4002	8000	5.63e-09	6.02e-09	46	56	90.8822	0.0849	0.9837
	2014-07-24	12:38:00	TCCOL1_FK1@43	4099	7991	5.28e-09	6.04e-09	51	55	92.21	0.07	0.984344
	2014-07-24	12:42:00	TCCOL1_FK1@44	4065	8091	5.25e-09	6.03e-09	53	58	93.5457	0.05	0.983987
	2014-07-24	12:46:00	TCCOL1_FK1@45	3873	8043	5.23e-09	6.05e-09	51	62	93.5195	0.085	0.983899
	2014-07-24	14:50:00	TCBOA12_FK1@19	5218	-2445	6.14e-09	6.18e-09	20	29	91.5506	0.01	0.984951
	2014-07-24	14:54:00	TCBOA12_FK1@20	5299	-2454	6.24e-09	6.17e-09	22	30	90.9086	0.025	0.985065
	2014-07-24	14:58:00	TCBOA12_FK1@21	5315	-2364	6.3e-09	6.16e-09	22	29	92.4808	0.0701	0.984725
	2014-07-24	15:51:00	TCBOA12_FK1@34	5400	-2484	5.98e-09	5.95e-09	29	33	95.1595	0.05	0.985769
	2014-07-24	15:56:00	TCBOA12_FK1@35	5398	-2396	5.99e-09	5.95e-09	28	31	92.7161	0.03	0.985453
	2014-07-24	16:00:00	TCBOA12_FK1@36	5441	-2428	5.99e-09	5.95e-09	30	33	93.04	0	0.985508
	2014-07-24	17:56:00	CHR50_FK1@15	752	7445	8.64e-09	5.95e-09	29	13	93.3787	0.0414	0.984948
	2014-07-24	18:01:00	CHR50_FK1@16	817	7577	9.01e-09	5.94e-09	30	14	93.331	0.0363	0.984841
	2014-07-24	18:05:00	CHR50_FK1@17	718	7591	9.1e-09	5.94e-09	31	17	92.7411	0.1138	0.984797
	2014-07-24	18:29:00	CHR50_FK1@23	763	7649	8.7e-09	5.91e-09	32	17	94.2818	0.0207	0.985056
	2014-07-24	18:33:00	CHR50_FK1@24	678	7395	8.88e-09	5.9e-09	31	16	92.9433	0.0414	0.985107
	2014-07-24	18:37:00	CHR50_FK1@25	721	7310	8.93e-09	5.88e-09	30	15	92.1035	0.03	0.98523
	2014-07-24	20:23:00	CHR10_FK1@1	-2641	-5621	8.48e-09	5.87e-09	5	-53	93.6924	0.0752	0.982699
	2014-07-24	20:27:00	CHR10_FK1@2	-2350	-5566	7.89e-09	5.85e-09	8	-56	93.5953	0	0.982827
	2014-07-24	20:31:00	CHR10_FK1@3	-2490	-5666	7.77e-09	5.84e-09	10	-56	93.2194	0.0501	0.982704
	2014-07-24	20:35:00	CHR10_FK1@4	-2513	-5533	7.64e-09	5.85e-09	11	-53	93.7171	0	0.983235
	2014-07-24	20:39:00	CHR10_FK1@5	-2320	-5471	7.59e-09	5.85e-09	13	-53	91.6364	0.01	0.983047
	2014-07-24	23:12:00	CHR10_FK1@42	-2522	-5611	7.57e-09	5.84e-09	11	-55	93.0173	0.0201	0.984446
	2014-07-24	23:17:00	CHR10_FK1@43	-2405	-5544	7.27e-09	5.81e-09	17	-57	93.6651	0.0802	0.984443
	2014-07-24	23:21:00	CHR10_FK1@44	-2612	-5560	7.04e-09	5.87e-09	8	-54	90.3633	0.005	0.982836
	2014-07-24	23:25:00	CHR10_FK1@45	-2383	-5456	6.94e-09	5.99e-09	16	-56	93.2512	0.0401	0.982952
	2014-07-24	23:33:00	CHR10_AB1@47	5149	-2304	6.92e-09	6.15e-09	0	10	88.75	1.0198	0.984746
	2014-07-24	23:37:00	CHR10_AB1@48	5038	-2320	7.27e-09	6.19e-09	-1	9	89.2551	0.7976	0.985156
	2014-07-24	23:41:00	CHR10_AB1@49	5098	-2396	7.31e-09	6.16e-09	-3	11	89.6154	0.8865	0.985482
	2014-07-24	23:46:00	CHR10_AB1@50	5191	-2359	7.31e-09	6.13e-09	-3	8	89.3577	0.9707	0.986417
	2014-07-24	23:50:00	CHR10_AB1@51	5281	-2347	7.44e-09	6.1e-09	1	8	89.3277	0.99	0.986457
	2014-07-25	01:54:00	CHR10_AB1@81	5205	-2440	6.46e-09	5.75e-09	0	-1	89.3199	1.0546	0.986466
	2014-07-25	01:58:00	CHR10_AB1@82	5232	-2275	6.85e-09	5.75e-09	-4	-3	89.2747	0.8773	0.986277
	2014-07-25	02:02:00	CHR10_AB1@83	5059	-2457	6.74e-09	5.79e-09	-3	-5	89.8744	0.7719	0.985491
	2014-07-25	02:06:00	CHR10_AB1@84	5292	-2412	6.94e-09	5.88e-09	-4	-1	89.2098	0.961	0.986221
	2014-07-25	02:10:00	CHR10_AB1@85	5126	-2459	6.9e-09	6e-09	-7	-4	89.5105	0.9165	0.984991
	2014-07-25	09:54:00	MOR59_AB1@1	1112	8463	9.95e-09	5.9e-09	39	81	88.7568	0.9163	0.985666
	2014-07-25	09:58:00	MOR59_AB1@2	1181	8332	9.78e-09	5.89e-09	40	78	88.784	1.0247	0.985697
	2014-07-25	10:02:00	MOR59_AB1@3	998	8350	9.43e-09	5.89e-09	41	78	89.7075	1.0157	0.985713
	2014-07-25	11:12:00	MOR59_AB1@20	1194	8417	7.61e-09	6.06e-09	44	83	89.71	0.95	0.986184
	2014-07-25	11:16:00	MOR59_AB1@21	1261	8344	7.66e-09	6.06e-09	46	81	89.72	0.91	0.986445
	2014-07-25	11:20:00	MOR59_AB1@22	953	8460	7.59e-09	6.05e-09	41	86	89.717	0.8663	0.98596
	2014-07-25	12:15:00	MOR59_FK1@35	5874	7059	7.12e-09	5.84e-09	94	4	94.8266	0.0849	0.987902
	2014-07-25	12:19:00	MOR59_FK1@36	5875	6926	7.27e-09	5.82e-09	91	6	94.3995	0.0499	0.987388
	2014-07-25	12:23:00	MOR59_FK1@37	5760	7110	7.4e-09	5.79e-09	95	8	94.285	0.0899	0.987471
	2014-07-25	13:00:00	MOR59_FK1@46	5804	7204	6.85e-09	5.75e-09	100	7	93.6179	0	0.987647
	2014-07-25	13:05:00	MOR59_FK1@47	5710	7028	6.74e-09	5.86e-09	91	10	93.8625	0	0.987494
	2014-07-25	13:09:00	MOR59_FK1@48	5824	6841	7.02e-09	5.96e-09	85	11	90.6055	0.02	0.986943
	2014-07-25	16:08:00	MOR61_FK1@25	-158	-6260	4.97e-09	5.78e-09	-1	3	92.07	0.04	0.98383
	2014-07-25	16:12:00	MOR61_FK1@26	-280	-6396	4.92e-09	5.8e-09	-7	-4	93.5363	0.01	0.983936
	2014-07-25	16:17:00	MOR61_FK1@27	-130	-6449	4.95e-09	5.81e-09	-1	-6	89.9014	0.035	0.98434
	2014-07-25	16:54:00	MOR61_FK1@36	-305	-6507	4.97e-09	5.78e-09	-6	-8	94.0792	0	0.984081
	2014-07-25	16:58:00	MOR61_FK1@37	-223	-6313	4.95e-09	5.78e-09	-3	-5	93.8726	0.0449	0.984525
	2014-07-25	17:02:00	MOR61_FK1@38	-60	-6614	4.85e-09	5.77e-09	1	-14	94.1099	0.02	0.985286
3	FITTED MODEL:
	ANOVA results and summary statistics of the K-feldspar model
		DG	SS	MS	F	Coeff	VIF	p-value
	Source
	Model	14	0.000122	9e-06	42.73	_	_	0
	Linear	8	7.9e-05	1e-05	48.76	_	_	0
	Interaction	4	2.6e-05	7e-06	32.19	_	_	0
	Square	2	1.4e-05	7e-06	33.26	_	_	0
	Terms
	Constant					0.984291		0
	X	1	6e-06	6e-06	29.25	0.000577	2.04	0
	Y	1	0	0	1.05	-0.000161	7.45	0.308
	CP	1	0	0	0.75	0.000209	5.82	0.387
	PI	1	0	0	0.69	0.000114	2.18	0.41
	LT1defX	1	2e-05	2e-05	99.53	0.002785	6.12	0
	LT1defY	1	1e-06	1e-06	4.91	-0.000374	3.78	0.029
	Or	1	0	0	0.05	3.7e-05	4.42	0.824
	BaO	1	7e-06	7e-06	34.66	0.000824	4.92	0
	X2	1	1e-05	1e-05	47.22	0.001031	1.55	0
	CP2	1	2e-06	2e-06	10.44	-0.000864	2.56	0.002
	Y × CP	1	6e-06	6e-06	27.21	0.001187	3.58	0
	CP × PI	1	8e-06	8e-06	41.05	0.002497	3.08	0
	PI × LT1defY	1	7e-06	7e-06	33.9	0.001806	2.57	0
	LT1defY × BaO	1	4e-06	4e-06	18.21	-0.000837	3.08	0
	Error	85	1.7e-05	0
	Total	99	0.000139
	Summary statistics		S	PRESS	R2	Adj-R2	Pred-R2	A.P.
			0.0004507	2.34e-05	0.8756	0.8551	0.8317	22.68
4	RESULTS:
		Fitted		Standardized	Leverage	Cook	Predicted	Predicted
	Label	IMF	Residuals	Residual	Hi	Distance	IMF	IMF 1σ
	Pattern1_ALBITE1@1	0.984913	-0.000525516	-1.23406	0.107166	0.0121862	0.984913	0.0001475
	Pattern1_ALBITE1@2	0.985275	0.000331428	0.789283	0.131872	0.00630876	0.985275	0.0001637
	Pattern1_ALBITE1@3	0.98526	0.00113921	2.73896	0.148254	0.0870513	0.98526	0.0001735
	Pattern1_ALBITE1@4	0.984725	0.000507386	1.18421	0.0961611	0.00994656	0.984725	0.0001398
	Pattern1_ALBITE1@5	0.984558	0.000874367	2.02911	0.085791	0.0257584	0.984558	0.000132
	Pattern1_ALBITE1@6	0.984758	9.98709e-05	0.231381	0.0827411	0.000321955	0.984758	0.0001296
	Pattern1_ALBITE1@7	0.985105	-0.000675942	-1.56431	0.0807306	0.0143269	0.985105	0.0001281
	Pattern1_ALBITE1@8	0.98495	-4.86654e-05	-0.112621	0.080661	7.41876e-05	0.98495	0.000128
	Pattern1_ALBITE1@9	0.985187	-0.000407251	-0.958829	0.111798	0.00771457	0.985187	0.0001507
	Pattern1_FK1@1	0.984389	-0.000434951	-1.03099	0.123717	0.0100046	0.984389	0.0001585
	Pattern1_FK1@2	0.984691	7.85863e-05	0.187779	0.137674	0.000375302	0.984691	0.0001672
	Pattern1_FK1@3	0.984671	-0.000551899	-1.31887	0.137841	0.0185396	0.984671	0.0001673
	Pattern1_FK1@4	0.983695	0.00059358	1.48492	0.213273	0.0398497	0.983695	0.0002081
	Pattern1_FK1@5	0.983811	5.60423e-06	0.0135505	0.157844	2.29432e-06	0.983811	0.0001791
	Pattern1_FK1@6	0.984143	-0.000462956	-1.09834	0.125268	0.0115172	0.984143	0.0001595
	Pattern1_FK1@7	0.983226	0.000146052	0.354344	0.163561	0.00163683	0.983226	0.0001823
	Pattern1_FK1@8	0.983209	0.000821908	2.01192	0.178336	0.0585703	0.983209	0.0001903
	Pattern1_FK1@9	0.983356	-0.000109511	-0.270046	0.190324	0.00114279	0.983356	0.0001966
	TCSAU020_FK1@1	0.984169	-0.000352945	-0.853987	0.159025	0.00919376	0.984169	0.0001797
	TCSAU020_FK1@2	0.984254	0.000223406	0.538365	0.152176	0.0034682	0.984254	0.0001758
	TCSAU020_FK1@3	0.984335	-0.000247818	-0.598484	0.155831	0.00440798	0.984335	0.0001779
	TCSAU020_FK1@13	0.984473	-0.000165075	-0.401183	0.166417	0.00214212	0.984473	0.0001838
	TCSAU020_FK1@14	0.984293	-0.00040334	-0.961792	0.134133	0.00955337	0.984293	0.0001651
	TCSAU020_FK1@15	0.983984	0.000166448	0.398523	0.141139	0.00173997	0.983984	0.0001693
	TCSAU020_AB1@16	0.984721	0.000255836	0.597784	0.098206	0.00259434	0.984721	0.0001412
	TCSAU020_AB1@17	0.984847	0.000417134	0.980693	0.109252	0.00786411	0.984847	0.000149
	TCSAU020_AB1@18	0.984324	0.000515447	1.20259	0.095514	0.0101815	0.984324	0.0001393
	TCSAU020_AB1@30	0.985235	0.000123233	0.287162	0.0932801	0.000565561	0.985235	0.0001376
	TCSAU020_AB1@31	0.985511	3.19574e-05	0.0763152	0.13664	6.14493e-05	0.985511	0.0001666
	TCSAU020_AB1@32	0.985689	-0.000859681	-2.07002	0.150825	0.0507381	0.985689	0.000175
	TCBOA2_AB1@1	0.982333	0.000356677	1.00341	0.377893	0.0407725	0.982333	0.000277
	TCBOA2_AB1@2	0.983184	-2.68042e-06	-0.00656695	0.179748	6.30018e-07	0.983184	0.0001911
	TCBOA2_AB1@3	0.983288	-0.0010611	-2.57015	0.160801	0.0843819	0.983288	0.0001807
	TCBOA2_AB1@39	0.983544	0.000240609	0.588853	0.17798	0.0050051	0.983544	0.0001901
	TCBOA2_AB1@40	0.984294	0.000139228	0.340304	0.17588	0.00164767	0.984294	0.000189
	TCBOA2_AB1@41	0.98436	0.000509761	1.30386	0.247441	0.0372652	0.98436	0.0002242
	TCBOA2_FK1@42	0.984144	2.0259e-05	0.0486973	0.147892	2.7439e-05	0.984144	0.0001733
	TCBOA2_FK1@43	0.983882	0.000381394	0.943159	0.194904	0.0143566	0.983882	0.000199
	TCBOA2_FK1@44	0.984039	-0.000789991	-1.86402	0.115672	0.0302989	0.984039	0.0001533
	TCBOA2_FK1@45	0.984245	-0.0002689	-0.623181	0.0833111	0.00235298	0.984245	0.0001301
	TCBOA2_FK1@46	0.984307	-0.000814761	-1.88784	0.0829325	0.0214863	0.984307	0.0001298
	TCBOA2_FK1@67	0.984363	9.29153e-05	0.214732	0.0781651	0.000260652	0.984363	0.000126
	TCBOA2_FK1@68	0.9842	0.000335309	0.77976	0.0895833	0.00398857	0.9842	0.0001349
	TCBOA2_FK1@69	0.984104	0.000169825	0.396772	0.0980309	0.00114068	0.984104	0.0001411
	TCBOA2_FK1@70	0.984087	-0.000117635	-0.275517	0.102471	0.00057777	0.984087	0.0001443
	TCCOL1_FK1@32	0.984078	-0.000336644	-0.791057	0.108346	0.00506921	0.984078	0.0001483
	TCCOL1_FK1@33	0.984254	-0.000309844	-0.726608	0.104727	0.00411728	0.984254	0.0001458
	TCCOL1_FK1@34	0.984141	-0.000441048	-1.07232	0.167093	0.0153786	0.984141	0.0001842
	TCCOL1_FK1@43	0.983766	0.000577879	1.42237	0.187317	0.0310876	0.983766	0.0001951
	TCCOL1_FK1@44	0.983843	0.00014392	0.355258	0.191974	0.00199901	0.983843	0.0001975
	TCCOL1_FK1@45	0.983732	0.000166725	0.414535	0.203569	0.00292815	0.983732	0.0002033
	TCBOA12_FK1@19	0.984542	0.0004094	1.01732	0.202653	0.0175361	0.984542	0.0002029
	TCBOA12_FK1@20	0.984802	0.000262631	0.647522	0.190061	0.00655932	0.984802	0.0001965
	TCBOA12_FK1@21	0.984919	-0.000194151	-0.473272	0.171432	0.00308955	0.984919	0.0001866
	TCBOA12_FK1@34	0.985534	0.000235546	0.582136	0.193932	0.00543546	0.985534	0.0001985
	TCBOA12_FK1@35	0.98543	2.34394e-05	0.0545528	0.0910705	1.98788e-05	0.98543	0.000136
	TCBOA12_FK1@36	0.985505	2.73121e-06	0.00640561	0.104925	3.20662e-07	0.985505	0.000146
	CHR50_FK1@15	0.984854	9.3784e-05	0.224149	0.138105	0.000536708	0.984854	0.0001675
	CHR50_FK1@16	0.984976	-0.000135273	-0.328578	0.165522	0.00142766	0.984976	0.0001834
	CHR50_FK1@17	0.985136	-0.000338598	-0.825144	0.170954	0.00935983	0.985136	0.0001863
	CHR50_FK1@23	0.984828	0.000227324	0.537296	0.118678	0.00259161	0.984828	0.0001553
	CHR50_FK1@24	0.984765	0.0003421	0.80537	0.111646	0.00543445	0.984765	0.0001506
	CHR50_FK1@25	0.984614	0.000616119	1.45253	0.114176	0.0181296	0.984614	0.0001523
	CHR10_FK1@1	0.982838	-0.000138937	-0.355005	0.245886	0.00273952	0.982838	0.0002235
	CHR10_FK1@2	0.983125	-0.000297908	-0.711828	0.13765	0.00539203	0.983125	0.0001672
	CHR10_FK1@3	0.983415	-0.000710964	-1.67862	0.116792	0.0248405	0.983415	0.000154
	CHR10_FK1@4	0.983342	-0.000107656	-0.253985	0.115425	0.000561162	0.983342	0.0001531
	CHR10_FK1@5	0.983436	-0.000389684	-0.921919	0.120348	0.00775216	0.983436	0.0001563
	CHR10_FK1@42	0.983464	0.000981627	2.30472	0.10684	0.0423591	0.983464	0.0001473
	CHR10_FK1@43	0.984129	0.000314462	0.742431	0.116726	0.00485619	0.984129	0.000154
	CHR10_FK1@44	0.98332	-0.000483758	-1.19576	0.194179	0.02297	0.98332	0.0001986
	CHR10_FK1@45	0.982861	9.11997e-05	0.236106	0.26541	0.00134275	0.982861	0.0002322
	CHR10_AB1@47	0.985568	-0.000822402	-1.9556	0.129277	0.0378536	0.985568	0.000162
	CHR10_AB1@48	0.985432	-0.000275877	-0.653737	0.123209	0.0040037	0.985432	0.0001582
	CHR10_AB1@49	0.985599	-0.000117245	-0.276047	0.11183	0.000639644	0.985599	0.0001507
	CHR10_AB1@50	0.985733	0.000684322	1.60954	0.109999	0.0213456	0.985733	0.0001495
	CHR10_AB1@51	0.986008	0.000448817	1.05211	0.104046	0.00856979	0.986008	0.0001454
	CHR10_AB1@81	0.986772	-0.000306191	-0.728196	0.129521	0.00526	0.986772	0.0001622
	CHR10_AB1@82	0.986269	8.46223e-06	0.0200771	0.125343	3.851e-06	0.986269	0.0001596
	CHR10_AB1@83	0.986026	-0.000535247	-1.24891	0.0956952	0.0110039	0.986026	0.0001394
	CHR10_AB1@84	0.986021	0.000200264	0.465543	0.0889168	0.00141012	0.986021	0.0001344
	CHR10_AB1@85	0.985492	-0.000501134	-1.17322	0.10171	0.0103901	0.985492	0.0001437
	MOR59_AB1@1	0.985671	-4.4265e-06	-0.0114589	0.26531	3.16116e-06	0.985671	0.0002321
	MOR59_AB1@2	0.98562	7.70459e-05	0.198168	0.255776	0.000899771	0.98562	0.0002279
	MOR59_AB1@3	0.985628	8.45052e-05	0.2112	0.211777	0.000798966	0.985628	0.0002074
	MOR59_AB1@20	0.986296	-0.000112203	-0.285958	0.241987	0.00174031	0.986296	0.0002217
	MOR59_AB1@21	0.986414	3.12242e-05	0.0783626	0.21831	0.000114331	0.986414	0.0002106
	MOR59_AB1@22	0.986083	-0.000122702	-0.309831	0.227804	0.00188796	0.986083	0.0002151
	MOR59_FK1@35	0.987539	0.000363595	0.89012	0.178497	0.011477	0.987539	0.0001904
	MOR59_FK1@36	0.987468	-8.03732e-05	-0.193977	0.154739	0.00045922	0.987468	0.0001773
	MOR59_FK1@37	0.987644	-0.000173435	-0.42216	0.169022	0.00241667	0.987644	0.0001853
	MOR59_FK1@46	0.98764	7.2663e-06	0.0179017	0.188832	4.97347e-06	0.98764	0.0001958
	MOR59_FK1@47	0.987059	0.000435538	1.03498	0.128109	0.0104926	0.987059	0.0001613
	MOR59_FK1@48	0.986927	1.6455e-05	0.0412182	0.215323	3.10804e-05	0.986927	0.0002091
	MOR61_FK1@25	0.984441	-0.000610796	-1.46453	0.143622	0.0239808	0.984441	0.0001708
	MOR61_FK1@26	0.984076	-0.000140192	-0.336443	0.145142	0.00128124	0.984076	0.0001717
	MOR61_FK1@27	0.984203	0.000137414	0.349985	0.241016	0.00259311	0.984203	0.0002213
	MOR61_FK1@36	0.9843	-0.000218972	-0.528186	0.153797	0.00338029	0.9843	0.0001767
	MOR61_FK1@37	0.984437	8.82124e-05	0.211893	0.146711	0.000514649	0.984437	0.0001726
	MOR61_FK1@38	0.984729	0.000556832	1.36534	0.181088	0.0274817	0.984729	0.0001918

## Sheet: 3.Quartz model 
	3.Quartz Response Surface Model
	From row 4 to 224
1	MODEL DESIGN:
	Central Composite Design
	Factors:		6		Cube points:		64
	Base runs:		90		Center points in cube:		14
	Base blocks:		1		Axial points:		12
	Replicates:		1		Center points in axial:		0
	Total runs:		90		α		2.82843
	Total blocks:		1
					design matrix
	StdOrder	RunOrder	PtType	Blocks	A	B	C	D	E	F
	59	1	1	1	-1	1	-1	1	1	1
	65	2	-1	1	-2.82843	0	0	0	0	0
	51	3	1	1	-1	1	-1	-1	1	1
	62	4	1	1	1	-1	1	1	1	1
	78	5	0	1	0	0	0	0	0	0
	56	6	1	1	1	1	1	-1	1	1
	9	7	1	1	-1	-1	-1	1	-1	-1
	84	8	0	1	0	0	0	0	0	0
	3	9	1	1	-1	1	-1	-1	-1	-1
	4	10	1	1	1	1	-1	-1	-1	-1
	25	11	1	1	-1	-1	-1	1	1	-1
	8	12	1	1	1	1	1	-1	-1	-1
	89	13	0	1	0	0	0	0	0	0
	47	14	1	1	-1	1	1	1	-1	1
	68	15	-1	1	0	2.82843	0	0	0	0
	31	16	1	1	-1	1	1	1	1	-1
	26	17	1	1	1	-1	-1	1	1	-1
	73	18	-1	1	0	0	0	0	-2.82843	0
	58	19	1	1	1	-1	-1	1	1	1
	71	20	-1	1	0	0	0	-2.82843	0	0
	15	21	1	1	-1	1	1	1	-1	-1
	20	22	1	1	1	1	-1	-1	1	-1
	72	23	-1	1	0	0	0	2.82843	0	0
	61	24	1	1	-1	-1	1	1	1	1
	35	25	1	1	-1	1	-1	-1	-1	1
	53	26	1	1	-1	-1	1	-1	1	1
	17	27	1	1	-1	-1	-1	-1	1	-1
	66	28	-1	1	2.82843	0	0	0	0	0
	14	29	1	1	1	-1	1	1	-1	-1
	6	30	1	1	1	-1	1	-1	-1	-1
	90	31	0	1	0	0	0	0	0	0
	57	32	1	1	-1	-1	-1	1	1	1
	33	33	1	1	-1	-1	-1	-1	-1	1
	77	34	0	1	0	0	0	0	0	0
	5	35	1	1	-1	-1	1	-1	-1	-1
	19	36	1	1	-1	1	-1	-1	1	-1
	37	37	1	1	-1	-1	1	-1	-1	1
	2	38	1	1	1	-1	-1	-1	-1	-1
	50	39	1	1	1	-1	-1	-1	1	1
	32	40	1	1	1	1	1	1	1	-1
	69	41	-1	1	0	0	-2.82843	0	0	0
	87	42	0	1	0	0	0	0	0	0
	79	43	0	1	0	0	0	0	0	0
	52	44	1	1	1	1	-1	-1	1	1
	23	45	1	1	-1	1	1	-1	1	-1
	16	46	1	1	1	1	1	1	-1	-1
	11	47	1	1	-1	1	-1	1	-1	-1
	80	48	0	1	0	0	0	0	0	0
	30	49	1	1	1	-1	1	1	1	-1
	60	50	1	1	1	1	-1	1	1	1
	67	51	-1	1	0	-2.82843	0	0	0	0
	43	52	1	1	-1	1	-1	1	-1	1
	29	53	1	1	-1	-1	1	1	1	-1
	75	54	-1	1	0	0	0	0	0	-2.82843
	39	55	1	1	-1	1	1	-1	-1	1
	81	56	0	1	0	0	0	0	0	0
	70	57	-1	1	0	0	2.82843	0	0	0
	82	58	0	1	0	0	0	0	0	0
	74	59	-1	1	0	0	0	0	2.82843	0
	27	60	1	1	-1	1	-1	1	1	-1
	49	61	1	1	-1	-1	-1	-1	1	1
	85	62	0	1	0	0	0	0	0	0
	12	63	1	1	1	1	-1	1	-1	-1
	7	64	1	1	-1	1	1	-1	-1	-1
	83	65	0	1	0	0	0	0	0	0
	44	66	1	1	1	1	-1	1	-1	1
	41	67	1	1	-1	-1	-1	1	-1	1
	42	68	1	1	1	-1	-1	1	-1	1
	40	69	1	1	1	1	1	-1	-1	1
	28	70	1	1	1	1	-1	1	1	-1
	54	71	1	1	1	-1	1	-1	1	1
	18	72	1	1	1	-1	-1	-1	1	-1
	34	73	1	1	1	-1	-1	-1	-1	1
	86	74	0	1	0	0	0	0	0	0
	64	75	1	1	1	1	1	1	1	1
	63	76	1	1	-1	1	1	1	1	1
	24	77	1	1	1	1	1	-1	1	-1
	36	78	1	1	1	1	-1	-1	-1	1
	10	79	1	1	1	-1	-1	1	-1	-1
	46	80	1	1	1	-1	1	1	-1	1
	22	81	1	1	1	-1	1	-1	1	-1
	55	82	1	1	-1	1	1	-1	1	1
	76	83	-1	1	0	0	0	0	0	2.82843
	13	84	1	1	-1	-1	1	1	-1	-1
	45	85	1	1	-1	-1	1	1	-1	1
	88	86	0	1	0	0	0	0	0	0
	21	87	1	1	-1	-1	1	-1	1	-1
	1	88	1	1	-1	-1	-1	-1	-1	-1
	48	89	1	1	1	1	1	1	-1	1
	38	90	1	1	1	-1	1	-1	-1	1
2	INPUT AND OUTPUT VARIABLES:
				INPUTS						OUTPUT
	Date	Hour	Label	X	Y	CP	PI	LT1defX	LT1defY	IMF
	2014-07-22	16:55:00	Pattern3_QUARS@1	-6993	-664	6.9e-09	6.11e-09	38	10	0.980224
	2014-07-22	16:59:00	Pattern3_QUARS@2	-6744	-717	6.85e-09	6.09e-09	46	9	0.980316
	2014-07-22	17:03:00	Pattern3_QUARS@3	-6925	-870	6.9e-09	6.07e-09	41	-8	0.980883
	2014-07-22	17:07:00	Pattern3_QUARS@4	-5453	-1711	6.95e-09	6.05e-09	46	36	0.980625
	2014-07-22	17:11:00	Pattern3_QUARS@5	-5705	-1943	6.94e-09	6.04e-09	53	35	0.981912
	2014-07-22	17:15:00	Pattern3_QUARS@6	-5772	-2135	6.9e-09	6.02e-09	52	37	0.981422
	2014-07-22	17:19:00	Pattern3_QUARS@7	-7772	-2695	6.98e-09	6e-09	-15	82	0.980926
	2014-07-22	17:23:00	Pattern3_QUARS@8	-7729	-2807	6.92e-09	5.99e-09	-14	80	0.981271
	2014-07-22	17:28:00	Pattern3_QUARS@9	-7902	-2893	6.81e-09	5.97e-09	-18	79	0.98115
	2014-07-23	14:23:00	TCSAU020_Q@33	7033	5535	6.92e-09	5.77e-09	30	-2	0.981416
	2014-07-23	14:27:00	TCSAU020_Q@34	7114	5613	6.98e-09	5.76e-09	33	-5	0.982129
	2014-07-23	14:31:00	TCSAU020_Q@35	7107	5446	7e-09	5.74e-09	35	-9	0.981971
	2014-07-23	15:12:00	TCSAU020_Q@45	7190	5496	6.42e-09	5.73e-09	38	-12	0.982239
	2014-07-23	15:16:00	TCSAU020_Q@46	6995	5450	6.55e-09	5.73e-09	34	-9	0.981617
	2014-07-23	15:20:00	TCSAU020_Q@47	7048	5344	6.61e-09	5.73e-09	34	-8	0.9816
	2014-07-24	01:09:00	TCBOA2_Q@71	6607	-1156	8.24e-09	5.64e-09	68	42	0.983032
	2014-07-24	01:13:00	TCBOA2_Q@72	6590	-1313	8.36e-09	5.63e-09	68	44	0.983448
	2014-07-24	01:17:00	TCBOA2_Q@73	6496	-1384	8.56e-09	5.62e-09	69	43	0.983306
	2014-07-24	01:21:00	TCBOA2_Q@74	6699	-1277	8.58e-09	5.61e-09	71	46	0.984321
	2014-07-24	02:23:00	TCBOA2_Q@89	6696	-1140	7.42e-09	5.65e-09	68	43	0.983402
	2014-07-24	02:27:00	TCBOA2_Q@90	6566	-1210	7.84e-09	5.64e-09	67	41	0.983578
	2014-07-24	02:32:00	TCBOA2_Q@91	6629	-1378	8.06e-09	5.63e-09	68	47	0.984152
	2014-07-24	02:36:00	TCBOA2_Q@92	6490	-1437	8.04e-09	5.62e-09	68	43	0.983428
	2014-07-24	02:40:00	TCBOA2_Q@93	6552	-1483	8.11e-09	5.61e-09	67	46	0.983617
	2014-07-24	10:16:00	TCCOL1_Q@16	-7784	-1220	7.38e-09	6.3e-09	-2	81	0.978076
	2014-07-24	10:20:00	TCCOL1_Q@17	-7777	-1364	7.12e-09	6.32e-09	-4	82	0.978262
	2014-07-24	10:24:00	TCCOL1_Q@18	-7701	-1293	7.08e-09	6.33e-09	1	80	0.978041
	2014-07-24	11:10:00	TCCOL1_Q@29	-7709	-1487	6.33e-09	6.17e-09	2	82	0.979092
	2014-07-24	11:14:00	TCCOL1_Q@30	-7690	-1607	6.18e-09	6.14e-09	-3	81	0.979143
	2014-07-24	11:18:00	TCCOL1_Q@31	-7817	-1718	6.16e-09	6.13e-09	-7	82	0.979242
	2014-07-25	03:21:00	CHR10_Q@102	6206	6502	6.68e-09	5.81e-09	14	5	0.982867
	2014-07-25	03:25:00	CHR10_Q@103	6174	6616	6.92e-09	5.91e-09	16	10	0.982578
	2014-07-25	03:30:00	CHR10_Q@104	6318	6564	7.08e-09	6.01e-09	15	8	0.983424
	2014-07-25	03:34:00	CHR10_Q@105	6344	6501	7.12e-09	6.08e-09	14	8	0.98314
	2014-07-25	03:38:00	CHR10_Q@106	6257	6648	7.02e-09	6.08e-09	13	10	0.983006
	2014-07-25	15:07:00	MOR61_Q@15	-531	9778	6.14e-09	5.8e-09	3	33	0.980819
	2014-07-25	15:11:00	MOR61_Q@16	-655	9742	6.03e-09	5.81e-09	3	32	0.980896
	2014-07-25	15:15:00	MOR61_Q@17	-579	9836	5.92e-09	5.8e-09	2	36	0.980913
	2014-07-25	15:36:00	MOR61_Q@22	-607	9680	5.7e-09	5.8e-09	5	37	0.980878
	2014-07-25	15:40:00	MOR61_Q@23	-494	9844	5.56e-09	5.8e-09	10	35	0.980575
	2014-07-25	15:44:00	MOR61_Q@24	-553	9885	5.49e-09	5.78e-09	2	40	0.981102
3	FITTED MODEL:
	ANOVA results and summary statistics of the quartz model
		DG	SS	MS	F	Coeff	Coeff.SE	VIF	p-value
	Source
	Model	7	0.000105	1.5e-05	77.86	_	_	_	0
	Linear	6	6.1e-05	1e-05	52.74	_	_	_	0
	Interaction	1	1.7e-05	1.7e-05	88.15	_	_	_	0
	Terms
	Constant					0.981405	0.000112		0
	X	1	9e-06	9e-06	46.47	0.001754	0.000257	10.01	0
	Y	1	3e-06	3e-06	14.43	-0.001003	0.000264	7.53	0.001
	CP	1	0	0	0.09	-0.000111	0.000366	7.13	0.763
	PI	1	0	0	0.92	-0.00024	0.000251	4.68	0.346
	LT1defX	1	1e-06	1e-06	6.43	-0.000641	0.000253	5.46	0.016
	LT1defY	1	0	0	2.35	-0.0003	0.000196	3.37	0.135
	PI × LT1defY	1	1.7e-05	1.7e-05	88.15	-0.002259	0.000241	1.58	0
	Error	33	6e-06	0
	Total	40	0.000111
	Summary statistics		S	PRESS	R2	Adj-R2	Pred-R2	A.P.
			0.0004388	9.4e-06	0.9429	0.9308	0.9159	32.87
4	RESULTS:
		Fitted		Standardized	Leverage	Cook	Predicted	Predicted
	Label	IMF	Residuals	Residual	Hi	Distance	IMF	IMF 1σ
	Pattern3_QUARS@1	0.980893	-0.00066898	-1.71991	0.214287	0.100845	0.980893	0.0002031
	Pattern3_QUARS@2	0.980817	-0.000500459	-1.28801	0.215943	0.0571136	0.980817	0.0002039
	Pattern3_QUARS@3	0.981147	-0.00026334	-0.737572	0.337977	0.0347162	0.981147	0.0002551
	Pattern3_QUARS@4	0.980693	-6.77904e-05	-0.164677	0.119928	0.000461933	0.980693	0.000152
	Pattern3_QUARS@5	0.980594	0.00131763	3.27534	0.159535	0.254542	0.980594	0.0001753
	Pattern3_QUARS@6	0.980613	0.000809009	2.00253	0.15239	0.0901216	0.980613	0.0001713
	Pattern3_QUARS@7	0.980748	0.000177981	0.47193	0.261341	0.00984983	0.980748	0.0002243
	Pattern3_QUARS@8	0.980853	0.000418697	1.11411	0.266518	0.0563776	0.980853	0.0002265
	Pattern3_QUARS@9	0.981032	0.000118909	0.333423	0.339481	0.00714222	0.981032	0.0002557
	TCSAU020_Q@33	0.982142	-0.000725327	-1.74816	0.105969	0.0452795	0.982142	0.0001428
	TCSAU020_Q@34	0.981993	0.000135707	0.330871	0.126358	0.00197923	0.981993	0.000156
	TCSAU020_Q@35	0.981796	0.000174823	0.438759	0.175494	0.00512189	0.981796	0.0001838
	TCSAU020_Q@45	0.981677	0.000561138	1.45124	0.22356	0.0758013	0.981677	0.0002075
	TCSAU020_Q@46	0.981765	-0.000147145	-0.371582	0.18562	0.00393384	0.981765	0.0001891
	TCSAU020_Q@47	0.981815	-0.000214797	-0.539221	0.175915	0.00775846	0.981815	0.000184
	TCBOA2_Q@71	0.983553	-0.000520696	-1.25768	0.109827	0.0243943	0.983553	0.0001454
	TCBOA2_Q@72	0.983659	-0.000210757	-0.514125	0.12728	0.00481873	0.983659	0.0001566
	TCBOA2_Q@73	0.983597	-0.000291381	-0.730902	0.174624	0.014128	0.983597	0.0001834
	TCBOA2_Q@74	0.98374	0.000581183	1.46467	0.182302	0.0597846	0.98374	0.0001874
	TCBOA2_Q@89	0.98365	-0.000248378	-0.648198	0.237464	0.0163554	0.98365	0.0002138
	TCBOA2_Q@90	0.983557	2.07789e-05	0.0501929	0.109962	3.89071e-05	0.983557	0.0001455
	TCBOA2_Q@91	0.983817	0.000335694	0.815176	0.119288	0.0112506	0.983817	0.0001516
	TCBOA2_Q@92	0.983656	-0.000227895	-0.54913	0.105526	0.00444684	0.983656	0.0001425
	TCBOA2_Q@93	0.98383	-0.000212659	-0.514934	0.114246	0.00427502	0.98383	0.0001483
	TCCOL1_Q@16	0.978265	-0.000188847	-0.523521	0.324231	0.0164375	0.978265	0.0002499
	TCCOL1_Q@17	0.978148	0.00011454	0.306652	0.27545	0.00446863	0.978148	0.0002303
	TCCOL1_Q@18	0.978124	-8.29049e-05	-0.222759	0.280653	0.00241999	0.978124	0.0002325
	TCCOL1_Q@29	0.979194	-0.000102404	-0.257467	0.178436	0.00179967	0.979194	0.0001854
	TCCOL1_Q@30	0.979538	-0.000395064	-1.00752	0.20149	0.0320175	0.979538	0.000197
	TCCOL1_Q@31	0.979625	-0.000383012	-0.981075	0.208465	0.0316868	0.979625	0.0002004
	CHR10_Q@102	0.982321	0.000546166	1.31316	0.101621	0.0243822	0.982321	0.0001399
	CHR10_Q@103	0.982592	-1.38463e-05	-0.0334419	0.109703	1.72256e-05	0.982592	0.0001453
	CHR10_Q@104	0.982927	0.000497163	1.27689	0.212699	0.0550603	0.982927	0.0002024
	CHR10_Q@105	0.98316	-1.98282e-05	-0.0550133	0.325349	0.000182438	0.98316	0.0002503
	CHR10_Q@106	0.983096	-9.01569e-05	-0.250116	0.325215	0.00376874	0.983096	0.0002502
	MOR61_Q@15	0.980862	-4.33588e-05	-0.110475	0.200022	0.000381448	0.980862	0.0001963
	MOR61_Q@16	0.980828	6.81814e-05	0.171119	0.175509	0.000779143	0.980828	0.0001838
	MOR61_Q@17	0.980921	-8.66114e-06	-0.0216745	0.170719	1.20889e-05	0.980921	0.0001813
	MOR61_Q@22	0.980928	-5.04209e-05	-0.126031	0.168786	0.000403173	0.980928	0.0001803
	MOR61_Q@23	0.980834	-0.000258634	-0.658126	0.197951	0.0133624	0.980834	0.0001952
	MOR61_Q@24	0.981043	5.91452e-05	0.150965	0.202865	0.000725004	0.981043	0.0001976

## Sheet: 4.Plagioclase additional model 
	4.Plagioclase Additional Response Surface Model, Rsu plagio
	From row 4 to 453
1	MODEL DESIGN:
	Central Composite Design
	Factors:	7			Cube points:		128
	Base runs:	152			Center points in cube:		10
	Base blocks:	1			Axial points:		14
	Replicates:	1			Center points in axial:		0
	Total runs:	152			α		3.36359
	Total blocks:	1			Two-level factorial: Full factorial
					design matrix
	StdOrder	RunOrder	PtType	Blocks	A	B	C	D	E	F	G
	46	1	1	1	1	-1	1	1	-1	1	-1
	4	2	1	1	1	1	-1	-1	-1	-1	-1
	71	3	1	1	-1	1	1	-1	-1	-1	1
	7	4	1	1	-1	1	1	-1	-1	-1	-1
	1	5	1	1	-1	-1	-1	-1	-1	-1	-1
	28	6	1	1	1	1	-1	1	1	-1	-1
	77	7	1	1	-1	-1	1	1	-1	-1	1
	144	8	0	1	0	0	0	0	0	0	0
	11	9	1	1	-1	1	-1	1	-1	-1	-1
	8	10	1	1	1	1	1	-1	-1	-1	-1
	121	11	1	1	-1	-1	-1	1	1	1	1
	123	12	1	1	-1	1	-1	1	1	1	1
	50	13	1	1	1	-1	-1	-1	1	1	-1
	96	14	1	1	1	1	1	1	1	-1	1
	151	15	0	1	0	0	0	0	0	0	0
	138	16	-1	1	0	0	0	0	3.36359	0	0
	24	17	1	1	1	1	1	-1	1	-1	-1
	80	18	1	1	1	1	1	1	-1	-1	1
	12	19	1	1	1	1	-1	1	-1	-1	-1
	19	20	1	1	-1	1	-1	-1	1	-1	-1
	51	21	1	1	-1	1	-1	-1	1	1	-1
	44	22	1	1	1	1	-1	1	-1	1	-1
	83	23	1	1	-1	1	-1	-1	1	-1	1
	68	24	1	1	1	1	-1	-1	-1	-1	1
	27	25	1	1	-1	1	-1	1	1	-1	-1
	31	26	1	1	-1	1	1	1	1	-1	-1
	39	27	1	1	-1	1	1	-1	-1	1	-1
	88	28	1	1	1	1	1	-1	1	-1	1
	105	29	1	1	-1	-1	-1	1	-1	1	1
	49	30	1	1	-1	-1	-1	-1	1	1	-1
	87	31	1	1	-1	1	1	-1	1	-1	1
	14	32	1	1	1	-1	1	1	-1	-1	-1
	119	33	1	1	-1	1	1	-1	1	1	1
	115	34	1	1	-1	1	-1	-1	1	1	1
	52	35	1	1	1	1	-1	-1	1	1	-1
	43	36	1	1	-1	1	-1	1	-1	1	-1
	37	37	1	1	-1	-1	1	-1	-1	1	-1
	70	38	1	1	1	-1	1	-1	-1	-1	1
	120	39	1	1	1	1	1	-1	1	1	1
	111	40	1	1	-1	1	1	1	-1	1	1
	34	41	1	1	1	-1	-1	-1	-1	1	-1
	84	42	1	1	1	1	-1	-1	1	-1	1
	94	43	1	1	1	-1	1	1	1	-1	1
	25	44	1	1	-1	-1	-1	1	1	-1	-1
	117	45	1	1	-1	-1	1	-1	1	1	1
	139	46	-1	1	0	0	0	0	0	-3.36359	0
	124	47	1	1	1	1	-1	1	1	1	1
	126	48	1	1	1	-1	1	1	1	1	1
	143	49	0	1	0	0	0	0	0	0	0
	62	50	1	1	1	-1	1	1	1	1	-1
	81	51	1	1	-1	-1	-1	-1	1	-1	1
	9	52	1	1	-1	-1	-1	1	-1	-1	-1
	36	53	1	1	1	1	-1	-1	-1	1	-1
	147	54	0	1	0	0	0	0	0	0	0
	91	55	1	1	-1	1	-1	1	1	-1	1
	136	56	-1	1	0	0	0	3.36359	0	0	0
	85	57	1	1	-1	-1	1	-1	1	-1	1
	102	58	1	1	1	-1	1	-1	-1	1	1
	95	59	1	1	-1	1	1	1	1	-1	1
	86	60	1	1	1	-1	1	-1	1	-1	1
	145	61	0	1	0	0	0	0	0	0	0
	76	62	1	1	1	1	-1	1	-1	-1	1
	58	63	1	1	1	-1	-1	1	1	1	-1
	33	64	1	1	-1	-1	-1	-1	-1	1	-1
	23	65	1	1	-1	1	1	-1	1	-1	-1
	20	66	1	1	1	1	-1	-1	1	-1	-1
	67	67	1	1	-1	1	-1	-1	-1	-1	1
	142	68	-1	1	0	0	0	0	0	0	3.36359
	137	69	-1	1	0	0	0	0	-3.36359	0	0
	75	70	1	1	-1	1	-1	1	-1	-1	1
	135	71	-1	1	0	0	0	-3.36359	0	0	0
	141	72	-1	1	0	0	0	0	0	0	-3.36359
	65	73	1	1	-1	-1	-1	-1	-1	-1	1
	22	74	1	1	1	-1	1	-1	1	-1	-1
	98	75	1	1	1	-1	-1	-1	-1	1	1
	2	76	1	1	1	-1	-1	-1	-1	-1	-1
	6	77	1	1	1	-1	1	-1	-1	-1	-1
	13	78	1	1	-1	-1	1	1	-1	-1	-1
	61	79	1	1	-1	-1	1	1	1	1	-1
	150	80	0	1	0	0	0	0	0	0	0
	109	81	1	1	-1	-1	1	1	-1	1	1
	113	82	1	1	-1	-1	-1	-1	1	1	1
	125	83	1	1	-1	-1	1	1	1	1	1
	72	84	1	1	1	1	1	-1	-1	-1	1
	99	85	1	1	-1	1	-1	-1	-1	1	1
	108	86	1	1	1	1	-1	1	-1	1	1
	42	87	1	1	1	-1	-1	1	-1	1	-1
	18	88	1	1	1	-1	-1	-1	1	-1	-1
	64	89	1	1	1	1	1	1	1	1	-1
	69	90	1	1	-1	-1	1	-1	-1	-1	1
	45	91	1	1	-1	-1	1	1	-1	1	-1
	133	92	-1	1	0	0	-3.36359	0	0	0	0
	122	93	1	1	1	-1	-1	1	1	1	1
	146	94	0	1	0	0	0	0	0	0	0
	140	95	-1	1	0	0	0	0	0	3.36359	0
	54	96	1	1	1	-1	1	-1	1	1	-1
	29	97	1	1	-1	-1	1	1	1	-1	-1
	56	98	1	1	1	1	1	-1	1	1	-1
	53	99	1	1	-1	-1	1	-1	1	1	-1
	89	100	1	1	-1	-1	-1	1	1	-1	1
	59	101	1	1	-1	1	-1	1	1	1	-1
	66	102	1	1	1	-1	-1	-1	-1	-1	1
	131	103	-1	1	0	-3.36359	0	0	0	0	0
	41	104	1	1	-1	-1	-1	1	-1	1	-1
	10	105	1	1	1	-1	-1	1	-1	-1	-1
	5	106	1	1	-1	-1	1	-1	-1	-1	-1
	114	107	1	1	1	-1	-1	-1	1	1	1
	127	108	1	1	-1	1	1	1	1	1	1
	63	109	1	1	-1	1	1	1	1	1	-1
	97	110	1	1	-1	-1	-1	-1	-1	1	1
	129	111	-1	1	-3.36359	0	0	0	0	0	0
	21	112	1	1	-1	-1	1	-1	1	-1	-1
	130	113	-1	1	3.36359	0	0	0	0	0	0
	148	114	0	1	0	0	0	0	0	0	0
	90	115	1	1	1	-1	-1	1	1	-1	1
	55	116	1	1	-1	1	1	-1	1	1	-1
	78	117	1	1	1	-1	1	1	-1	-1	1
	112	118	1	1	1	1	1	1	-1	1	1
	57	119	1	1	-1	-1	-1	1	1	1	-1
	40	120	1	1	1	1	1	-1	-1	1	-1
	38	121	1	1	1	-1	1	-1	-1	1	-1
	116	122	1	1	1	1	-1	-1	1	1	1
	101	123	1	1	-1	-1	1	-1	-1	1	1
	73	124	1	1	-1	-1	-1	1	-1	-1	1
	93	125	1	1	-1	-1	1	1	1	-1	1
	110	126	1	1	1	-1	1	1	-1	1	1
	30	127	1	1	1	-1	1	1	1	-1	-1
	26	128	1	1	1	-1	-1	1	1	-1	-1
	132	129	-1	1	0	3.36359	0	0	0	0	0
	134	130	-1	1	0	0	3.36359	0	0	0	0
	106	131	1	1	1	-1	-1	1	-1	1	1
	152	132	0	1	0	0	0	0	0	0	0
	60	133	1	1	1	1	-1	1	1	1	-1
	79	134	1	1	-1	1	1	1	-1	-1	1
	16	135	1	1	1	1	1	1	-1	-1	-1
	104	136	1	1	1	1	1	-1	-1	1	1
	100	137	1	1	1	1	-1	-1	-1	1	1
	82	138	1	1	1	-1	-1	-1	1	-1	1
	107	139	1	1	-1	1	-1	1	-1	1	1
	74	140	1	1	1	-1	-1	1	-1	-1	1
	35	141	1	1	-1	1	-1	-1	-1	1	-1
	48	142	1	1	1	1	1	1	-1	1	-1
	118	143	1	1	1	-1	1	-1	1	1	1
	47	144	1	1	-1	1	1	1	-1	1	-1
	15	145	1	1	-1	1	1	1	-1	-1	-1
	149	146	0	1	0	0	0	0	0	0	0
	17	147	1	1	-1	-1	-1	-1	1	-1	-1
	3	148	1	1	-1	1	-1	-1	-1	-1	-1
	103	149	1	1	-1	1	1	-1	-1	1	1
	128	150	1	1	1	1	1	1	1	1	1
	32	151	1	1	1	1	1	1	1	-1	-1
	92	152	1	1	1	1	-1	1	1	-1	1
2	INPUT AND OUTPUT VARIABLES:
				INPUTS							OUTPUT	Important:
	Date	Hour	Label	X	Y	CP	PI	LT1defX	LT1defY	An	IMFu*	*IMFu calculated using the formula of Equation 15, which includes the standard error of the real isotopic ratio obtained from n fluorination values of each standard (see Table 1).
	2014-07-22	09:52:00	Pattern1_Ande003@3	6100	1791	8.28e-09	5.98e-09	-24	4	52.7719	0.983759
	2014-07-22	09:52:00	Pattern1_Ande001@1	5980	2231	8.58e-09	5.98e-09	-22	6	52.1	0.983843
	2014-07-22	09:52:00	Pattern1_Ande002@2	5933	2004	8.77e-09	5.97e-09	-23	4	51.5119	0.983971
	2014-07-22	10:24:00	Pattern1_Ande@4	6350	454	9.43e-09	5.95e-09	-28	1	51.7582	0.984505
	2014-07-22	10:28:00	Pattern1_Ande@5	6455	230	9.4e-09	5.96e-09	-29	1	52.6903	0.984702
	2014-07-22	10:32:00	Pattern1_Ande@6	6648	-149	9.32e-09	5.95e-09	-29	-1	52.3	0.984617
	2014-07-22	10:36:00	Pattern1_Ande@7	6821	-41	9.48e-09	5.95e-09	-28	-1	52.6889	0.984209
	2014-07-22	10:44:00	Pattern1_Ande@9	7411	842	9.78e-09	5.98e-09	-30	-2	51.7358	0.983833
	2014-07-22	11:18:00	Pattern1_OLIG@1	2042	-1828	7.29e-09	6.02e-09	-8	-3	24.0861	0.984903
	2014-07-22	11:22:00	Pattern1_OLIG@2	1938	-1709	7.12e-09	6.03e-09	-4	0	23.1164	0.984565
	2014-07-22	11:26:00	Pattern1_OLIG@3	1049	-1238	7.1e-09	6.02e-09	-1	2	24.1012	0.985121
	2014-07-22	11:30:00	Pattern1_OLIG@4	961	-1341	6.87e-09	6.02e-09	1	2	22.9277	0.985219
	2014-07-22	11:34:00	Pattern1_OLIG@5	72	-1516	6.81e-09	6.02e-09	7	-1	23.6316	0.985803
	2014-07-22	11:38:00	Pattern1_OLIG@6	72	-1382	6.81e-09	6.02e-09	5	-2	24.5137	0.986054
	2014-07-22	11:43:00	Pattern1_OLIG@7	662	-2132	6.68e-09	6.01e-09	4	-11	24.1408	0.985843
	2014-07-22	11:47:00	Pattern1_OLIG@8	817	-2010	6.74e-09	6e-09	5	-8	24.0219	0.985616
	2014-07-22	13:15:00	Pattern1_FK2@1	288	-4333	7.12e-09	6e-09	34	33	8.00655	0.985721
	2014-07-22	13:19:00	Pattern1_FK2@2	193	-4511	7.1e-09	6.01e-09	34	27	8.46289	0.985438
	2014-07-22	13:23:00	Pattern1_FK2@3	387	-4520	7e-09	6.02e-09	34	26	7.68781	0.985819
	2014-07-22	13:27:00	Pattern1_FK2@4	1682	-3531	6.87e-09	6.02e-09	28	48	8.61712	0.986174
	2014-07-22	13:31:00	Pattern1_FK2@5	1491	-3726	6.61e-09	6.03e-09	32	45	7.7386	0.985499
	2014-07-22	13:36:00	Pattern1_FK2@6	1638	-3804	6.44e-09	6.01e-09	29	41	7.79905	0.985883
	2014-07-22	13:40:00	Pattern1_FK2@7	3140	-2514	6.24e-09	5.98e-09	12	63	8.03821	0.98638
	2014-07-22	13:44:00	Pattern1_FK2@8	3022	-2441	6.14e-09	5.96e-09	9	63	7.2813	0.986772
	2014-07-22	13:48:00	Pattern1_FK2@9	3040	-2279	6.14e-09	5.99e-09	11	65	6.92877	0.986066
	2014-07-22	15:15:00	Pattern1_BYT@1	-1109	6488	6.7e-09	5.74e-09	75	48	69.9893	0.988078
	2014-07-22	15:23:00	Pattern1_BYT@3	-1036	6349	6.26e-09	5.82e-09	77	45	68.5009	0.988448
	2014-07-22	15:27:00	Pattern1_BYT@4	-492	5107	6.06e-09	5.85e-09	69	19	70.4638	0.98713
	2014-07-22	15:31:00	Pattern1_BYT@5	-288	5108	5.9e-09	5.87e-09	67	18	69.3402	0.987204
	2014-07-22	15:35:00	Pattern1_BYT@6	-398	5300	5.76e-09	5.9e-09	69	22	68.6012	0.98727
	2014-07-22	15:39:00	Pattern1_BYT@7	339	6509	5.65e-09	5.93e-09	70	46	68.4502	0.987365
	2014-07-22	15:43:00	Pattern1_BYT@8	219	6357	5.78e-09	5.95e-09	71	45	70.8508	0.987063
	2014-07-22	15:47:00	Pattern1_BYT@9	423	6304	5.56e-09	5.97e-09	70	43	70.2919	0.987496
	2014-07-22	15:52:00	Pattern1_ALBITE2@1	-7318	3726	5.56e-09	5.99e-09	81	-4	8.98492	0.984299
	2014-07-22	15:56:00	Pattern1_ALBITE2@2	-7537	3738	5.41e-09	6.01e-09	83	-6	9.5174	0.984256
	2014-07-22	16:00:00	Pattern1_ALBITE2@3	-7358	3652	5.4e-09	6.01e-09	82	-5	9.3953	0.984557
	2014-07-22	16:04:00	Pattern1_ALBITE2@4	-8354	3236	5.38e-09	6.01e-09	98	-12	10.8866	0.983368
	2014-07-22	16:08:00	Pattern1_ALBITE2@5	-8325	3062	5.4e-09	6.02e-09	99	-9	10.9583	0.984123
	2014-07-22	16:12:00	Pattern1_ALBITE2@6	-8472	3137	5.4e-09	6.03e-09	103	-13	11.2929	0.983623
	2014-07-22	16:16:00	Pattern1_ALBITE2@7	-7628	2198	5.43e-09	6.02e-09	95	1	3.10738	0.984545
	2014-07-22	16:20:00	Pattern1_ALBITE2@8	-7514	2133	5.65e-09	6e-09	94	3	4.32843	0.984548
	2014-07-22	16:24:00	Pattern1_ALBITE2@9	-7714	2030	5.65e-09	6.15e-09	97	2	1.61378	0.985536
	2014-07-22	18:12:00	Pattern2_AN@1	-9592	1786	6.92e-09	5.83e-09	74	20	96.8983	0.986483
	2014-07-22	18:16:00	Pattern2_AN@2	-9718	1851	6.66e-09	5.81e-09	64	15	95.7066	0.986424
	2014-07-22	18:20:00	Pattern2_AN@3	-9814	1975	6.59e-09	5.79e-09	48	4	97.1982	0.987158
	2014-07-22	18:24:00	Pattern2_AN@4	-9901	2105	6.59e-09	5.74e-09	26	-6	96.8536	0.988485
	2014-07-22	18:29:00	Pattern2_AN@5	-9963	2440	6.55e-09	5.61e-09	-7	-29	97.123	0.990024
	2014-07-22	18:33:00	Pattern2_AN@6	-9771	2440	6.68e-09	5.76e-09	37	-16	95.8621	0.987036
	2014-07-22	18:37:00	Pattern2_AN@7	-9804	2209	6.56e-09	5.76e-09	44	-6	95.5026	0.987172
	2014-07-22	18:41:00	Pattern2_AN@8	-9932	2685	6.53e-09	5.51e-09	-16	-41	95.0991	0.990353
	2014-07-22	18:57:00	Pattern2_LAB2@1	-2056	5682	6.64e-09	5.79e-09	-3	18	54.2863	0.986556
	2014-07-22	19:01:00	Pattern2_LAB2@02	-2040	5929	6.64e-09	5.78e-09	-3	20	52.7287	0.986313
	2014-07-22	19:05:00	Pattern2_LAB2@03	-1836	5893	6.59e-09	5.78e-09	-1	20	54.1358	0.986365
	2014-07-22	19:10:00	Pattern2_LAB2@04	-1869	5587	6.62e-09	5.78e-09	-2	16	53.532	0.986611
	2014-07-22	19:14:00	Pattern2_LAB2@05	-1731	5753	6.56e-09	5.76e-09	-1	18	54.0004	0.986678
	2014-07-22	19:18:00	Pattern2_LAB2@06	-483	5914	6.56e-09	5.76e-09	4	20	55.3335	0.985964
	2014-07-22	19:22:00	Pattern2_LAB2@07	-250	5878	6.42e-09	5.78e-09	4	18	56.6743	0.986542
	2014-07-22	19:26:00	Pattern2_LAB2@08	-176	5658	6.53e-09	5.82e-09	4	17	53.1577	0.985934
	2014-07-22	19:30:00	Pattern2_LAB2@09	-457	5635	6.55e-09	5.86e-09	-2	16	54.4636	0.985743
	2014-07-22	19:34:00	Pattern2_LAB2@10	-346	5782	6.55e-09	5.88e-09	-4	16	55.2	0.985986
	2014-07-22	19:38:00	Pattern2_LAB2@11	1831	5995	6.42e-09	5.89e-09	9	17	55.8728	0.986016
	2014-07-22	19:43:00	Pattern2_LAB2@12	1868	6226	6.42e-09	5.9e-09	12	16	54.6687	0.985622
	2014-07-22	19:47:00	Pattern2_LAB2@13	1319	5936	6.28e-09	5.9e-09	7	19	55.9526	0.985907
	2014-07-22	19:51:00	Pattern2_LAB2@14	1318	5728	5.9e-09	5.89e-09	8	16	54.9634	0.985976
	2014-07-22	19:55:00	Pattern2_LAB2@15	1750	5658	5.72e-09	5.88e-09	9	15	54.7008	0.986058
	2014-07-23	09:57:00	Pattern2_LAB1@2	2274	-3478	6.55e-09	5.75e-09	39	29	59.638	0.984416
	2014-07-23	10:02:00	Pattern2_LAB1@3	2570	-3414	6.33e-09	5.76e-09	42	30	61.9127	0.984331
	2014-07-23	10:06:00	Pattern2_LAB1@4	1661	-4498	6.2e-09	5.78e-09	37	13	63.9435	0.985258
	2014-07-23	10:10:00	Pattern2_LAB1@5	1734	-4279	6.22e-09	5.79e-09	40	16	62.5906	0.984881
	2014-07-23	10:14:00	Pattern2_LAB1@6	1834	-4493	6.26e-09	5.8e-09	40	14	63.0134	0.985219
	2014-07-23	10:18:00	Pattern2_LAB1@7	2402	-4493	6.3e-09	5.81e-09	44	16	64.9273	0.984778
	2014-07-23	10:22:00	Pattern2_LAB1@8	2222	-4562	6.37e-09	5.81e-09	43	14	63.2906	0.984862
	2014-07-23	10:26:00	Pattern2_LAB1@9	2314	-4341	6.46e-09	5.81e-09	43	15	62.7285	0.98493
	2014-07-23	16:36:00	TCCOL1_OLIG@1	-8737	4119	6.08e-09	5.7e-09	-21	-18	21.0594	0.9835
	2014-07-23	16:40:00	TCCOL1_OLIG@2	-8622	4234	5.96e-09	5.7e-09	-20	-17	21.9047	0.984001
	2014-07-23	16:44:00	TCCOL1_OLIG@3	-8579	4047	5.83e-09	5.7e-09	-13	-11	21.4187	0.983501
	2014-07-23	17:26:00	TCCOL1_OLIG@13	-8652	4181	5.41e-09	5.67e-09	-13	-15	20.8741	0.983791
	2014-07-23	17:30:00	TCCOL1_OLIG@14	-8534	4125	5.43e-09	5.7e-09	-11	-10	21.0669	0.984009
	2014-07-23	17:34:00	TCCOL1_OLIG@15	-8685	4054	5.22e-09	5.74e-09	-13	-10	21.8015	0.983381
	2014-07-24	13:35:00	TCBOA12_Olig@1	-2004	6532	6.64e-09	5.98e-09	16	41	21.0376	0.983071
	2014-07-24	13:40:00	TCBOA12_Olig@2	-1936	6610	6.53e-09	5.97e-09	17	42	20.7524	0.98347
	2014-07-24	13:44:00	TCBOA12_Olig@3	-2032	6591	6.55e-09	5.96e-09	16	40	21.3612	0.983635
	2014-07-24	14:37:00	TCBOA12_Olig@16	-2000	6651	5.98e-09	6.26e-09	12	41	20.1727	0.983734
	2014-07-24	14:41:00	TCBOA12_Olig@17	-2060	6663	5.98e-09	6.23e-09	14	41	20.5	0.984037
	2014-07-24	14:45:00	TCBOA12_Olig@18	-1856	6745	6.12e-09	6.2e-09	18	42	20.9026	0.983843
	2014-07-24	16:58:00	CHR50_ANDE@1	-1231	-4926	9.9e-09	5.95e-09	-2	6	53.5454	0.985577
	2014-07-24	17:02:00	CHR50_ANDE@2	-1099	-4875	9.34e-09	5.95e-09	0	4	53.7488	0.98598
	2014-07-24	17:06:00	CHR50_ANDE@3	-1201	-4789	9.34e-09	5.93e-09	-1	5	53.2858	0.985358
	2014-07-24	17:43:00	CHR50_ANDE@12	-1296	-4824	9.03e-09	5.93e-09	0	3	52.0268	0.985717
	2014-07-24	17:47:00	CHR50_ANDE@13	-1276	-4688	8.72e-09	5.95e-09	0	2	53.3709	0.985363
	2014-07-24	17:52:00	CHR50_ANDE@14	-1063	-4800	8.56e-09	5.96e-09	3	1	52.4607	0.986497
	2014-07-25	02:15:00	CHR10_ANDE@86	-2108	7904	6.9e-09	6.09e-09	17	85	48.1629	0.98583
	2014-07-25	02:19:00	CHR10_ANDE@87	-2148	7936	6.81e-09	6.11e-09	14	85	49.4643	0.986686
	2014-07-25	02:23:00	CHR10_ANDE@88	-2160	7852	6.79e-09	6.09e-09	16	80	50.861	0.985563
	2014-07-25	03:09:00	CHR10_ANDE@99	-2174	7882	6.83e-09	5.76e-09	21	82	49.9739	0.986496
	2014-07-25	03:13:00	CHR10_ANDE@100	-2165	7965	6.66e-09	5.73e-09	17	86	47.5991	0.987288
	2014-07-25	03:17:00	CHR10_ANDE@101	-2093	7953	6.66e-09	5.73e-09	20	80	49.1611	0.986633
	2014-07-25	11:25:00	MOR59_OLIG@23	-6517	7624	7.72e-09	6.02e-09	-52	11	21.9845	0.984362
	2014-07-25	11:29:00	MOR59_OLIG@24	-6677	7505	7.36e-09	5.99e-09	-54	33	21.4254	0.983639
	2014-07-25	11:33:00	MOR59_OLIG@25	-6535	7772	7.36e-09	5.99e-09	-49	3	22.3447	0.984701
	2014-07-25	12:02:00	MOR59_OLIG@32	-6606	7733	7.12e-09	5.85e-09	-47	5	21.7491	0.984469
	2014-07-25	12:06:00	MOR59_OLIG@33	-6474	7857	7.16e-09	5.85e-09	-43	2	21.4485	0.984941
	2014-07-25	12:10:00	MOR59_OLIG@34	-6741	7616	7.18e-09	5.85e-09	-46	12	22.0276	0.984685
	2014-07-25	14:08:00	MOR61_Olig@1	5384	5736	6.66e-09	5.92e-09	87	-41	23.3067	0.985674
	2014-07-25	14:13:00	MOR61_Olig@2	5425	5818	6.74e-09	5.91e-09	90	-43	26.4601	0.985994
	2014-07-25	14:17:00	MOR61_Olig@3	5506	5597	6.72e-09	5.89e-09	87	-40	22.5282	0.986397
	2014-07-25	14:54:00	MOR61_Olig@12	5382	5675	6.18e-09	5.83e-09	87	-41	27.1619	0.986028
	2014-07-25	14:58:00	MOR61_Olig@13	5516	5515	6.3e-09	5.82e-09	87	-39	22.1088	0.986489
	2014-07-25	15:02:00	MOR61_Olig@14	5402	5545	6.14e-09	5.8e-09	85	-36	23.1775	0.985831
	2014-07-25	17:24:00	AN-Std@1	1512	1242	5.68e-09	5.77e-09	29	15	96.1644	0.987074
	2014-07-25	17:28:00	AN-Std@2	1415	900	5.66e-09	5.78e-09	25	20	96.8774	0.98645
	2014-07-25	17:32:00	AN-Std@3	1815	901	5.61e-09	5.79e-09	21	15	96.7381	0.985981
	2014-07-25	17:37:00	AN-Std@4	2186	1047	5.63e-09	5.81e-09	19	12	96.591	0.986221
	2014-07-25	17:41:00	AN-Std@5	2614	1473	5.75e-09	5.81e-09	16	10	96.7554	0.986501
	2014-07-25	17:45:00	AN-Std@6	2988	1462	5.66e-09	5.8e-09	16	9	97.0699	0.986086
	2014-07-25	17:49:00	AN-Std@7	2809	1121	5.61e-09	5.8e-09	15	12	96.3024	0.986144
	2014-07-25	17:53:00	AN-Std@8	2834	789	5.63e-09	5.81e-09	14	13	96.5242	0.986099
	2014-07-25	17:57:00	AN-Std@9	2540	504	5.43e-09	5.81e-09	15	14	96.4817	0.986489
	2014-07-25	18:01:00	AN-Std@10	2309	-250	5.47e-09	5.79e-09	13	14	96.9345	0.986236
3	FITTED MODEL:
	ANOVA results and summary statistics of the additional plagioclase model
		DG	SS	MS	F	Coeff.	VIF	p-value
	Source
	Model	15	0.00019	1.3e-05	63.14	_	_	0
	Linear	7	8.8e-05	1.3e-05	62.55	_	_	0
	Interaction	5	7.6e-05	1.5e-05	75.28	_	_	0
	Square	3	3.3e-05	1.1e-05	55.13	_	_	0
	Terms
	Constant					0.985224		0
	X	1	1e-06	1e-06	5.95	-0.000258	1.94	0.016
	Y	1	0	0	0.66	-8.1e-05	2.36	0.419
	CP	1	5e-06	5e-06	25.5	-0.000944	4.27	0
	PI	1	0	0	0.15	0.000116	6.08	0.698
	LT1defX	1	1e-06	1e-06	3.79	-0.000334	4.09	0.054
	LT1defY	1	0	0	0.05	-3.6e-05	2.97	0.832
	An	1	3.1e-05	3.1e-05	156.65	0.001589	3.46	0
	X2	1	2.6e-05	2.6e-05	128.82	-0.002418	2.77	0
	LT1defX2	1	1.5e-05	1.5e-05	74.83	0.002604	4.18	0
	LT1defY2	1	9e-06	9e-06	44.37	0.001448	2.14	0
	X × An	1	1.8e-05	1.8e-05	89.83	-0.00208	4.16	0
	Y × PI	1	1e-06	1e-06	6.14	-0.001085	5.4	0.015
	Y × An	1	2e-06	2e-06	9.46	0.001063	6.5	0.003
	LT1defX × LT1defY	1	2e-06	2e-06	10.5	0.001305	5.39	0.002
	LT1defX × An	1	6e-06	6e-06	30.89	-0.00128	2.85	0
	Error	103	2.1e-05	0
	Total	118	0.00021
	Summary statistics		S	R2	Adj-R2	Pred-R2
			0.0004482	0.9019	0.8876	0.8633
4	RESULTS:								5	TOTAL UNCERTAINTY:		(1) From 1.Plagioclase model
		Fitted		Standardized	Leverage	Cook	Predicted	Predicted		Predicted	Predicted	18O/16O	d18O	d18O	Total
	Label	IMFu	Residuals	Residual	Hi	Distance	IMFu	IMFu 1σ		IMF(1)	IMF 1σ (1)	SIMS	by IMF+1σ	by IMFu-1σ	Uncertainty
	Pattern1_Ande003@3	0.984568	-0.000808717	-1.89806	0.0964185	0.0240266	0.984568	0.0001392		0.984775	0.0001392	0.0019879	6.55715	7.05346	0.496311
	Pattern1_Ande001@1	0.984331	-0.000487605	-1.14373	0.0953502	0.00861729	0.984331	0.0001384		0.98456	0.0001384	0.0019881	6.87903	7.39649	0.517459
	Pattern1_Ande002@2	0.984376	-0.000405164	-0.949754	0.0941983	0.00586289	0.984376	0.0001376		0.984602	0.0001376	0.0019883	6.93819	7.45095	0.512759
	Pattern1_Ande@4	0.984289	0.000215935	0.513397	0.119493	0.00223561	0.984289	0.0001549		0.984524	0.000155	0.0019894	7.55727	8.11514	0.557869
	Pattern1_Ande@5	0.984325	0.000376845	0.89692	0.121358	0.00694453	0.984325	0.0001561		0.984558	0.0001562	0.0019898	7.72383	8.28218	0.558351
	Pattern1_Ande@6	0.98431	0.000306696	0.73173	0.125601	0.00480693	0.98431	0.0001589		0.984531	0.0001589	0.0019896	7.64741	8.19907	0.551664
	Pattern1_Ande@7	0.984092	0.000116856	0.281009	0.139295	0.000798736	0.984092	0.0001673		0.984323	0.0001673	0.0019888	7.44646	8.02558	0.579121
	Pattern1_Ande@9	0.983756	7.76337e-05	0.192232	0.188211	0.000535469	0.983756	0.0001945		0.983989	0.0001945	0.001988	7.35513	7.99218	0.637047
	Pattern1_OLIG@1	0.985772	-0.000868671	-2.02129	0.080716	0.0224205	0.985772	0.0001273		0.98582	0.0001274	0.0019912	7.17153	7.48084	0.309311
	Pattern1_OLIG@2	0.985653	-0.00108755	-2.52901	0.079565	0.0345551	0.985653	0.0001264		0.985709	0.0001265	0.0019905	6.93175	7.24735	0.315609
	Pattern1_OLIG@3	0.98554	-0.000418283	-0.962665	0.0603119	0.00371749	0.98554	0.0001101		0.985613	0.0001101	0.0019917	7.65368	7.95349	0.299812
	Pattern1_OLIG@4	0.985587	-0.000367628	-0.84859	0.0658531	0.00317276	0.985587	0.000115		0.985653	0.0001151	0.0019919	7.70886	8.01164	0.302781
	Pattern1_OLIG@5	0.98562	0.000183082	0.424125	0.0725373	0.000879291	0.98562	0.0001207		0.985688	0.0001208	0.001993	8.22372	8.54036	0.316637
	Pattern1_OLIG@6	0.985674	0.000380492	0.883038	0.075882	0.00400175	0.985674	0.0001235		0.985736	0.0001235	0.0019935	8.4248	8.74097	0.316172
	Pattern1_OLIG@7	0.98606	-0.000216787	-0.513925	0.114351	0.00213135	0.98606	0.0001516		0.986085	0.0001516	0.0019931	7.83695	8.17245	0.3355
	Pattern1_OLIG@8	0.985888	-0.000271952	-0.63542	0.0882884	0.0024437	0.985888	0.0001332		0.985931	0.0001332	0.0019927	7.81086	8.12718	0.316323
	Pattern1_FK2@1	0.985672	4.86983e-05	0.115781	0.119464	0.00011367	0.985672	0.0001549		0.985861	0.000155	0.0019961	9.57976	10.0908	0.511081
	Pattern1_FK2@2	0.985694	-0.000255187	-0.606363	0.118448	0.00308762	0.985694	0.0001543		0.985878	0.0001543	0.0019955	9.25961	9.76407	0.504456
	Pattern1_FK2@3	0.985775	4.41618e-05	0.104499	0.111079	8.52853e-05	0.985775	0.0001494		0.98595	0.0001494	0.0019963	9.59552	10.0808	0.485323
	Pattern1_FK2@4	0.985798	0.000375913	0.878291	0.0882148	0.00466451	0.985798	0.0001331		0.985955	0.0001332	0.001997	9.96101	10.3947	0.433734
	Pattern1_FK2@5	0.986002	-0.000502775	-1.1825	0.100211	0.00973317	0.986002	0.0001419		0.986146	0.0001419	0.0019957	9.09919	9.53707	0.437884
	Pattern1_FK2@6	0.985908	-2.49814e-05	-0.0586327	0.09646	2.29382e-05	0.985908	0.0001392		0.986055	0.0001393	0.0019964	9.54894	9.9847	0.435765
	Pattern1_FK2@7	0.985754	0.000625488	1.52251	0.159941	0.0275837	0.985754	0.0001793		0.985894	0.0001793	0.0019974	10.1786	10.6896	0.511047
	Pattern1_FK2@8	0.985722	0.00105052	2.58068	0.175226	0.0884328	0.985722	0.0001876		0.985866	0.0001877	0.0019982	10.6033	11.1358	0.532509
	Pattern1_FK2@9	0.985817	0.000249108	0.611234	0.173286	0.00489446	0.985817	0.0001866		0.985945	0.0001866	0.0019968	9.81542	10.3289	0.513498
	Pattern1_BYT@1	0.987885	0.000192568	0.481877	0.205141	0.00374554	0.987885	0.000203		0.987956	0.0002031	0.0019949	6.78459	7.27092	0.486328
	Pattern1_BYT@3	0.987827	0.00062086	1.52288	0.172724	0.0302632	0.987827	0.0001863		0.987865	0.0001863	0.0019957	7.29822	7.71699	0.418772
	Pattern1_BYT@4	0.986968	0.000161165	0.378954	0.0997444	0.000994432	0.986968	0.0001416		0.987058	0.0001416	0.001993	6.8033	7.18406	0.380755
	Pattern1_BYT@5	0.986881	0.000322858	0.754097	0.0876489	0.00341444	0.986881	0.0001327		0.986968	0.0001327	0.0019932	7.00522	7.36486	0.359634
	Pattern1_BYT@6	0.986998	0.000272444	0.635569	0.0854142	0.00235782	0.986998	0.000131		0.987066	0.000131	0.0019933	6.95751	7.29422	0.336718
	Pattern1_BYT@7	0.98739	-2.46508e-05	-0.0591908	0.136729	3.46816e-05	0.98739	0.0001657		0.987418	0.0001658	0.0019935	6.66411	7.03069	0.366579
	Pattern1_BYT@8	0.987392	-0.0003288	-0.792547	0.14334	0.00656884	0.987392	0.0001697		0.987421	0.0001697	0.0019929	6.3541	6.72964	0.375539
	Pattern1_BYT@9	0.987292	0.000204396	0.491328	0.138622	0.00242807	0.987292	0.0001669		0.987317	0.0001669	0.0019937	6.86696	7.23293	0.365976
	Pattern1_ALBITE2@1	0.983824	0.000474868	1.10947	0.0881784	0.00743983	0.983824	0.0001331		0.983955	0.0001331	0.0019984	12.7232	13.1321	0.408923
	Pattern1_ALBITE2@2	0.983883	0.00037264	0.870534	0.0879865	0.00456948	0.983883	0.000133		0.984007	0.000133	0.0019983	12.6191	13.0205	0.401445
	Pattern1_ALBITE2@3	0.983944	0.000613209	1.4305	0.0853914	0.0119408	0.983944	0.000131		0.984065	0.000131	0.001999	12.9162	13.3105	0.39433
	Pattern1_ALBITE2@4	0.984467	-0.00109824	-2.61716	0.123541	0.0603419	0.984467	0.0001575		0.98461	0.0001576	0.0019965	11.0622	11.5327	0.470551
	Pattern1_ALBITE2@5	0.984563	-0.000440117	-1.04905	0.123928	0.00972968	0.984563	0.0001578		0.984704	0.0001578	0.0019981	11.7757	12.245	0.469295
	Pattern1_ALBITE2@6	0.984743	-0.00111955	-2.7111	0.151239	0.0818559	0.984743	0.0001743		0.984885	0.0001744	0.0019971	11.0664	11.5703	0.503906
	Pattern1_ALBITE2@7	0.984551	-5.09619e-06	-0.0122575	0.139632	1.52398e-06	0.984551	0.0001675		0.984702	0.0001675	0.0019989	12.1729	12.6726	0.49972
	Pattern1_ALBITE2@8	0.98454	8.06586e-06	0.019357	0.135792	3.67969e-06	0.98454	0.0001652		0.984699	0.0001652	0.0019989	12.1783	12.6815	0.503223
	Pattern1_ALBITE2@9	0.984533	0.00100358	2.48785	0.190063	0.0907771	0.984533	0.0001954		0.984668	0.0001955	0.0020009	13.1918	13.7331	0.541316
	Pattern2_AN@1	0.987107	-0.000624528	-1.61071	0.25172	0.0545467	0.987107	0.0002249		0.987198	0.0002249	0.0019924	6.27259	6.82401	0.551426
	Pattern2_AN@2	0.986909	-0.00048507	-1.21454	0.20607	0.0239295	0.986909	0.0002035		0.98705	0.0002035	0.0019923	6.39474	6.95367	0.558935
	Pattern2_AN@3	0.986988	0.000170385	0.418891	0.176519	0.00235081	0.986988	0.0001883		0.987192	0.0001884	0.0019938	7.02301	7.61561	0.592601
	Pattern2_AN@4	0.987437	0.0010481	2.54136	0.153422	0.0731533	0.987437	0.0001756		0.987705	0.0001756	0.0019965	7.87613	8.50826	0.632129
	Pattern2_AN@5	0.989697	0.000327402	0.889381	0.325502	0.0238577	0.989697	0.0002557		0.989953	0.0002558	0.0019996	7.06766	7.84883	0.781173
	Pattern2_AN@6	0.987395	-0.000358744	-0.876315	0.165852	0.00954289	0.987395	0.0001825		0.987614	0.0001826	0.0019936	6.49774	7.09325	0.59551
	Pattern2_AN@7	0.987066	0.000106386	0.259355	0.162529	0.000815889	0.987066	0.0001807		0.987281	0.0001808	0.0019938	6.94	7.52821	0.588215
	Pattern2_AN@8	0.990791	-0.000438622	-1.46648	0.554728	0.16745	0.990791	0.0003338		0.990996	0.0003339	0.0020003	6.28091	7.16755	0.886642
	Pattern2_LAB2@1	0.98646	9.59912e-05	0.222473	0.073377	0.000244958	0.98646	0.0001214		0.986709	0.0001215	0.0019936	7.48309	7.98553	0.502445
	Pattern2_LAB2@02	0.986374	-6.02833e-05	-0.13995	0.076481	0.000101375	0.986374	0.000124		0.986624	0.000124	0.0019931	7.31462	7.82326	0.508636
	Pattern2_LAB2@03	0.986419	-5.39888e-05	-0.125248	0.0751721	7.96925e-05	0.986419	0.0001229		0.98667	0.0001229	0.0019932	7.31933	7.82672	0.507389
	Pattern2_LAB2@04	0.986424	0.000187307	0.433528	0.0708868	0.00089621	0.986424	0.0001193		0.986663	0.0001194	0.0019937	7.58274	8.07074	0.488006
	Pattern2_LAB2@05	0.986464	0.000213994	0.496991	0.0772156	0.00129176	0.986464	0.0001246		0.98671	0.0001246	0.0019938	7.57997	8.08584	0.505864
	Pattern2_LAB2@06	0.986316	-0.000352098	-0.817315	0.0762773	0.00344757	0.986316	0.0001238		0.986564	0.0001238	0.0019924	7.02228	7.52835	0.506068
	Pattern2_LAB2@07	0.986393	0.000149197	0.344586	0.0669192	0.000532238	0.986393	0.000116		0.986631	0.000116	0.0019936	7.56834	8.04849	0.480146
	Pattern2_LAB2@08	0.986099	-0.000165598	-0.380111	0.0553228	0.000528836	0.986099	0.0001054		0.98632	0.0001055	0.0019923	7.2395	7.68071	0.441206
	Pattern2_LAB2@09	0.986299	-0.000555433	-1.27515	0.0556411	0.0059877	0.986299	0.0001057		0.986521	0.0001058	0.001992	6.88235	7.32495	0.442594
	Pattern2_LAB2@10	0.986357	-0.000370433	-0.852243	0.0596547	0.00287981	0.986357	0.0001095		0.98658	0.0001095	0.0019925	7.07109	7.52242	0.451332
	Pattern2_LAB2@11	0.985662	0.000354483	0.81396	0.0559839	0.00245567	0.985662	0.0001061		0.985872	0.0001061	0.0019925	7.79771	8.22943	0.431728
	Pattern2_LAB2@12	0.985539	8.36438e-05	0.192565	0.0609111	0.000150323	0.985539	0.0001106		0.985739	0.0001107	0.0019917	7.52428	7.95502	0.430747
	Pattern2_LAB2@13	0.985858	4.94938e-05	0.113362	0.0512315	4.33703e-05	0.985858	0.0001015		0.986067	0.0001015	0.0019923	7.50199	7.92308	0.421089
	Pattern2_LAB2@14	0.985988	-1.16602e-05	-0.0266794	0.0492728	2.30559e-06	0.985988	9.95e-05		0.98617	9.95e-05	0.0019924	7.44938	7.83871	0.389332
	Pattern2_LAB2@15	0.985951	0.000107603	0.246756	0.0535283	0.000215224	0.985951	0.0001037		0.986123	0.0001037	0.0019926	7.59424	7.982	0.387769
	Pattern2_LAB1@2	0.984842	-0.000426459	-1.05049	0.179722	0.0151115	0.984842	0.00019		0.985019	0.0001901	0.0019887	6.66081	7.23037	0.569552
	Pattern2_LAB1@3	0.98488	-0.000549145	-1.32347	0.143076	0.0182782	0.98488	0.0001695		0.985033	0.0001696	0.0019886	6.61684	7.11988	0.503047
	Pattern2_LAB1@4	0.98509	0.000167918	0.399191	0.119301	0.00134915	0.98509	0.0001548		0.985223	0.0001549	0.0019904	7.34874	7.80152	0.452774
	Pattern2_LAB1@5	0.985115	-0.000233356	-0.550481	0.105569	0.00223539	0.985115	0.0001456		0.985245	0.0001457	0.0019897	6.98139	7.41211	0.430715
	Pattern2_LAB1@6	0.985082	0.000137117	0.322032	0.097644	0.000701366	0.985082	0.0001401		0.985206	0.0001401	0.0019904	7.38125	7.79466	0.413409
	Pattern2_LAB1@7	0.984908	-0.000130288	-0.305867	0.0969043	0.000627417	0.984908	0.0001395		0.98502	0.0001396	0.0019895	7.11637	7.51634	0.399975
	Pattern2_LAB1@8	0.98495	-8.7635e-05	-0.205205	0.0922323	0.000267401	0.98495	0.0001361		0.985068	0.0001362	0.0019896	7.12139	7.52054	0.399141
	Pattern2_LAB1@9	0.984905	2.5503e-05	0.0595966	0.0885482	2.1566e-05	0.984905	0.0001334		0.98503	0.0001334	0.0019898	7.26435	7.6651	0.400749
	TCCOL1_OLIG@1	0.983786	-0.000286566	-0.701767	0.170042	0.00630618	0.983786	0.0001848		0.983813	0.0001849	0.0019884	7.74787	8.1543	0.406439
	TCCOL1_OLIG@2	0.983897	0.00010375	0.251524	0.153139	0.000715008	0.983897	0.0001754		0.983927	0.0001755	0.0019894	8.14751	8.53787	0.390358
	TCCOL1_OLIG@3	0.983449	5.22897e-05	0.126796	0.153518	0.000182235	0.983449	0.0001756		0.983524	0.0001757	0.0019884	8.05336	8.4904	0.437043
	TCCOL1_OLIG@13	0.983686	0.000105618	0.257688	0.163857	0.0008133	0.983686	0.0001814		0.983728	0.0001815	0.001989	8.14252	8.55757	0.415043
	TCCOL1_OLIG@14	0.983502	0.000506505	1.22281	0.14602	0.0159793	0.983502	0.0001713		0.983568	0.0001713	0.0019894	8.51972	8.93879	0.419067
	TCCOL1_OLIG@15	0.983602	-0.00022144	-0.532132	0.138077	0.00283512	0.983602	0.0001666		0.983653	0.0001666	0.0019881	7.77843	8.17214	0.39371
	TCBOA12_Olig@1	0.983879	-0.00080809	-1.93061	0.127986	0.0341908	0.983879	0.0001604		0.984003	0.0001604	0.0019875	7.12234	7.57773	0.455382
	TCBOA12_Olig@2	0.98394	-0.000470782	-1.13157	0.138476	0.0128634	0.98394	0.0001668		0.98406	0.0001668	0.0019883	7.46283	7.92735	0.464523
	TCBOA12_Olig@3	0.983949	-0.000313895	-0.75182	0.132367	0.00538955	0.983949	0.0001631		0.984073	0.0001631	0.0019887	7.65598	8.11711	0.461123
	TCBOA12_Olig@16	0.983511	0.000222948	0.556113	0.200025	0.00483297	0.983511	0.0002005		0.98357	0.0002005	0.0019889	8.23427	8.70593	0.47166
	TCBOA12_Olig@17	0.983579	0.000457572	1.12973	0.183487	0.0179255	0.983579	0.000192		0.983642	0.0001921	0.0019895	8.47323	8.93174	0.458506
	TCBOA12_Olig@18	0.983643	0.000200067	0.491444	0.175103	0.0032042	0.983643	0.0001876		0.983713	0.0001876	0.0019891	8.20233	8.65873	0.456403
	CHR50_ANDE@1	0.985257	0.000320388	0.7885	0.178242	0.00842849	0.985257	0.0001892		0.98551	0.0001893	0.0019916	7.62741	8.27337	0.645962
	CHR50_ANDE@2	0.985452	0.000527992	1.27005	0.139781	0.0163817	0.985452	0.0001676		0.985675	0.0001676	0.0019924	7.88564	8.45664	0.571004
	CHR50_ANDE@3	0.985396	-3.79241e-05	-0.0910414	0.136332	8.17727e-05	0.985396	0.0001655		0.985631	0.0001655	0.0019911	7.27511	7.85378	0.578664
	CHR50_ANDE@12	0.985509	0.000208177	0.494833	0.119066	0.00206843	0.985509	0.0001547		0.985725	0.0001547	0.0019918	7.5442	8.08143	0.537232
	CHR50_ANDE@13	0.985739	-0.000376119	-0.891705	0.114471	0.00642416	0.985739	0.0001517		0.985931	0.0001517	0.0019911	6.98276	7.48892	0.506154
	CHR50_ANDE@14	0.98574	0.000756881	1.7999	0.119862	0.0275747	0.98574	0.0001552		0.985917	0.0001552	0.0019934	8.15671	8.65527	0.498562
	CHR10_ANDE@86	0.986113	-0.000283474	-0.72635	0.241894	0.0105213	0.986113	0.0002205		0.986307	0.0002205	0.0019921	7.03425	7.68287	0.648617
	CHR10_ANDE@87	0.986161	0.000524892	1.3757	0.275419	0.044961	0.986161	0.0002352		0.986367	0.0002353	0.0019938	7.81721	8.50874	0.691521
	CHR10_ANDE@88	0.986125	-0.000562036	-1.41739	0.217392	0.0348785	0.986125	0.000209		0.986337	0.000209	0.0019915	6.71207	7.35536	0.643289
	CHR10_ANDE@99	0.986999	-0.0005033	-1.25589	0.200633	0.0247423	0.986999	0.0002008		0.98722	0.0002008	0.0019934	6.77978	7.41499	0.635207
	CHR10_ANDE@100	0.987139	0.000148587	0.387294	0.267382	0.00342149	0.987139	0.0002318		0.987357	0.0002318	0.001995	7.41647	8.11224	0.695765
	CHR10_ANDE@101	0.987013	-0.000380065	-0.959052	0.218329	0.0160565	0.987013	0.0002094		0.987235	0.0002095	0.0019937	6.90713	7.56109	0.653957
	MOR59_OLIG@23	0.984155	0.000207078	0.515128	0.195671	0.00403461	0.984155	0.0001983		0.984208	0.0001983	0.0019901	8.19101	8.65168	0.460673
	MOR59_OLIG@24	0.983936	-0.000296961	-0.825241	0.355487	0.0234766	0.983936	0.0002672		0.984082	0.0002673	0.0019887	7.5401	8.23712	0.697014
	MOR59_OLIG@25	0.984434	0.000267015	0.649777	0.159502	0.00500771	0.984434	0.000179		0.984441	0.0001791	0.0019908	8.32663	8.70066	0.374029
	MOR59_OLIG@32	0.984605	-0.000136764	-0.331388	0.152265	0.00123281	0.984605	0.0001749		0.984632	0.000175	0.0019903	7.88207	8.26795	0.385879
	MOR59_OLIG@33	0.984466	0.00047545	1.13872	0.132306	0.0123575	0.984466	0.000163		0.984483	0.0001631	0.0019913	8.55325	8.9048	0.351553
	MOR59_OLIG@34	0.984306	0.000378931	0.913537	0.143627	0.00874796	0.984306	0.0001699		0.984381	0.0001699	0.0019908	8.39751	8.82253	0.425026
	MOR61_Olig@1	0.985814	-0.00014007	-0.341604	0.163165	0.00142205	0.985814	0.0001811		0.985864	0.0001811	0.0019928	7.88096	8.30246	0.421504
	MOR61_Olig@2	0.985933	6.10109e-05	0.151737	0.195317	0.000349284	0.985933	0.0001981		0.985989	0.0001982	0.0019934	8.03914	8.50168	0.462534
	MOR61_Olig@3	0.98579	0.000607091	1.47563	0.157545	0.0254504	0.98579	0.0001779		0.98585	0.000178	0.0019942	8.60651	9.03212	0.425603
	MOR61_Olig@12	0.986128	-0.000100123	-0.244693	0.166656	0.000748373	0.986128	0.000183		0.986174	0.000183	0.0019935	7.91617	8.33735	0.421181
	MOR61_Olig@13	0.986045	0.00044375	1.08299	0.164354	0.0144175	0.986045	0.0001817		0.986102	0.0001818	0.0019944	8.44605	8.87618	0.430132
	MOR61_Olig@14	0.986006	-0.000175591	-0.427169	0.15899	0.002156	0.986006	0.0001787		0.986061	0.0001788	0.0019931	7.83368	8.25539	0.421708
	AN-Std@1	0.98639	0.000683887	1.57848	0.0656988	0.0109503	0.98639	0.0001149		0.986588	0.0001149	0.0019936	7.61338	8.05043	0.437056
	AN-Std@2	0.986453	-3.61706e-06	-0.0083575	0.0677063	3.17036e-07	0.986453	0.0001166		0.986663	0.0001167	0.0019924	6.92849	7.38105	0.452555
	AN-Std@3	0.986406	-0.000424851	-0.985738	0.0754214	0.00495398	0.986406	0.0001231		0.986618	0.0001231	0.0019914	6.46248	6.93005	0.467575
	AN-Std@4	0.986331	-0.000110823	-0.258441	0.0847697	0.000386646	0.986331	0.0001305		0.986544	0.0001305	0.0019919	6.78313	7.26703	0.483893
	AN-Std@5	0.986256	0.000244951	0.572503	0.0888335	0.00199717	0.986256	0.0001336		0.986489	0.0001336	0.0019925	7.13937	7.65023	0.510861
	AN-Std@6	0.986105	-1.92004e-05	-0.0450864	0.0973443	1.37012e-05	0.986105	0.0001398		0.986337	0.0001399	0.0019916	6.83314	7.35567	0.52253
	AN-Std@7	0.986144	-2.10891e-07	-0.000493623	0.0915109	1.534e-09	0.986144	0.0001356		0.986375	0.0001356	0.0019918	6.89985	7.41269	0.512841
	AN-Std@8	0.986092	7.36431e-06	0.0173161	0.0997611	2.07675e-06	0.986092	0.0001416		0.98632	0.0001416	0.0019917	6.89931	7.42137	0.522062
	AN-Std@9	0.986233	0.000256707	0.608282	0.113538	0.00296191	0.986233	0.000151		0.986445	0.0001511	0.0019925	7.16643	7.69152	0.525092
	AN-Std@10	0.98624	-4.51212e-06	-0.0107772	0.127541	1.06119e-06	0.98624	0.0001601		0.986452	0.0001601	0.0019919	6.84681	7.39022	0.543408
															0.479086	average
															0.100608	standard deviation

## Sheet: 5.K-felds additional model
	5.K-feldspar Additional Response Surface Model, RSu K-feldspar
	From row 4 to 416
1	MODEL DESIGN:
	Central Composite Design
	Factors:		8		Cube points:		128
	Base runs:		154		Center points in cube:		10
	Base blocks:		1		Axial points:		16
	Replicates:		1		Center points in axial:		0
	Total runs:		154		α		3.36359
	Total blocks:		1		Two-level factorial: Half fraction
					design matrix
	StdOrder	RunOrder	PtType	Blocks	A	B	C	D	E	F	G	H
	31	1	1	1	-1	1	1	1	1	-1	-1	-1
	69	2	1	1	-1	-1	1	-1	-1	-1	1	-1
	16	3	1	1	1	1	1	1	-1	-1	-1	-1
	151	4	0	1	0	0	0	0	0	0	0	0
	40	5	1	1	1	1	1	-1	-1	1	-1	-1
	51	6	1	1	-1	1	-1	-1	1	1	-1	1
	153	7	0	1	0	0	0	0	0	0	0	0
	81	8	1	1	-1	-1	-1	-1	1	-1	1	-1
	118	9	1	1	1	-1	1	-1	1	1	1	1
	133	10	-1	1	0	0	-3.36359	0	0	0	0	0
	94	11	1	1	1	-1	1	1	1	-1	1	1
	65	12	1	1	-1	-1	-1	-1	-1	-1	1	1
	58	13	1	1	1	-1	-1	1	1	1	-1	-1
	92	14	1	1	1	1	-1	1	1	-1	1	1
	68	15	1	1	1	1	-1	-1	-1	-1	1	1
	109	16	1	1	-1	-1	1	1	-1	1	1	-1
	122	17	1	1	1	-1	-1	1	1	1	1	1
	103	18	1	1	-1	1	1	-1	-1	1	1	-1
	23	19	1	1	-1	1	1	-1	1	-1	-1	1
	56	20	1	1	1	1	1	-1	1	1	-1	1
	61	21	1	1	-1	-1	1	1	1	1	-1	-1
	70	22	1	1	1	-1	1	-1	-1	-1	1	1
	88	23	1	1	1	1	1	-1	1	-1	1	1
	1	24	1	1	-1	-1	-1	-1	-1	-1	-1	-1
	100	25	1	1	1	1	-1	-1	-1	1	1	-1
	139	26	-1	1	0	0	0	0	0	-3.36359	0	0
	142	27	-1	1	0	0	0	0	0	0	3.36359	0
	29	28	1	1	-1	-1	1	1	1	-1	-1	1
	150	29	0	1	0	0	0	0	0	0	0	0
	101	30	1	1	-1	-1	1	-1	-1	1	1	1
	66	31	1	1	1	-1	-1	-1	-1	-1	1	-1
	130	32	-1	1	3.36359	0	0	0	0	0	0	0
	86	33	1	1	1	-1	1	-1	1	-1	1	-1
	131	34	-1	1	0	-3.36359	0	0	0	0	0	0
	2	35	1	1	1	-1	-1	-1	-1	-1	-1	1
	20	36	1	1	1	1	-1	-1	1	-1	-1	1
	136	37	-1	1	0	0	0	3.36359	0	0	0	0
	128	38	1	1	1	1	1	1	1	1	1	1
	96	39	1	1	1	1	1	1	1	-1	1	-1
	129	40	-1	1	-3.36359	0	0	0	0	0	0	0
	71	41	1	1	-1	1	1	-1	-1	-1	1	1
	104	42	1	1	1	1	1	-1	-1	1	1	1
	8	43	1	1	1	1	1	-1	-1	-1	-1	1
	72	44	1	1	1	1	1	-1	-1	-1	1	-1
	146	45	0	1	0	0	0	0	0	0	0	0
	149	46	0	1	0	0	0	0	0	0	0	0
	116	47	1	1	1	1	-1	-1	1	1	1	1
	87	48	1	1	-1	1	1	-1	1	-1	1	-1
	30	49	1	1	1	-1	1	1	1	-1	-1	-1
	5	50	1	1	-1	-1	1	-1	-1	-1	-1	1
	52	51	1	1	1	1	-1	-1	1	1	-1	-1
	84	52	1	1	1	1	-1	-1	1	-1	1	-1
	27	53	1	1	-1	1	-1	1	1	-1	-1	1
	95	54	1	1	-1	1	1	1	1	-1	1	1
	141	55	-1	1	0	0	0	0	0	0	-3.36359	0
	62	56	1	1	1	-1	1	1	1	1	-1	1
	15	57	1	1	-1	1	1	1	-1	-1	-1	1
	91	58	1	1	-1	1	-1	1	1	-1	1	-1
	13	59	1	1	-1	-1	1	1	-1	-1	-1	-1
	143	60	-1	1	0	0	0	0	0	0	0	-3.36359
	67	61	1	1	-1	1	-1	-1	-1	-1	1	-1
	9	62	1	1	-1	-1	-1	1	-1	-1	-1	1
	21	63	1	1	-1	-1	1	-1	1	-1	-1	-1
	28	64	1	1	1	1	-1	1	1	-1	-1	-1
	48	65	1	1	1	1	1	1	-1	1	-1	1
	144	66	-1	1	0	0	0	0	0	0	0	3.36359
	11	67	1	1	-1	1	-1	1	-1	-1	-1	-1
	42	68	1	1	1	-1	-1	1	-1	1	-1	1
	93	69	1	1	-1	-1	1	1	1	-1	1	-1
	83	70	1	1	-1	1	-1	-1	1	-1	1	1
	89	71	1	1	-1	-1	-1	1	1	-1	1	1
	46	72	1	1	1	-1	1	1	-1	1	-1	-1
	4	73	1	1	1	1	-1	-1	-1	-1	-1	-1
	112	74	1	1	1	1	1	1	-1	1	1	-1
	74	75	1	1	1	-1	-1	1	-1	-1	1	1
	3	76	1	1	-1	1	-1	-1	-1	-1	-1	1
	10	77	1	1	1	-1	-1	1	-1	-1	-1	-1
	25	78	1	1	-1	-1	-1	1	1	-1	-1	-1
	138	79	-1	1	0	0	0	0	3.36359	0	0	0
	44	80	1	1	1	1	-1	1	-1	1	-1	-1
	108	81	1	1	1	1	-1	1	-1	1	1	1
	12	82	1	1	1	1	-1	1	-1	-1	-1	1
	43	83	1	1	-1	1	-1	1	-1	1	-1	1
	105	84	1	1	-1	-1	-1	1	-1	1	1	1
	107	85	1	1	-1	1	-1	1	-1	1	1	-1
	39	86	1	1	-1	1	1	-1	-1	1	-1	1
	6	87	1	1	1	-1	1	-1	-1	-1	-1	-1
	79	88	1	1	-1	1	1	1	-1	-1	1	-1
	102	89	1	1	1	-1	1	-1	-1	1	1	-1
	19	90	1	1	-1	1	-1	-1	1	-1	-1	-1
	37	91	1	1	-1	-1	1	-1	-1	1	-1	-1
	123	92	1	1	-1	1	-1	1	1	1	1	1
	17	93	1	1	-1	-1	-1	-1	1	-1	-1	1
	113	94	1	1	-1	-1	-1	-1	1	1	1	1
	47	95	1	1	-1	1	1	1	-1	1	-1	-1
	38	96	1	1	1	-1	1	-1	-1	1	-1	1
	36	97	1	1	1	1	-1	-1	-1	1	-1	1
	90	98	1	1	1	-1	-1	1	1	-1	1	-1
	147	99	0	1	0	0	0	0	0	0	0	0
	26	100	1	1	1	-1	-1	1	1	-1	-1	1
	121	101	1	1	-1	-1	-1	1	1	1	1	-1
	64	102	1	1	1	1	1	1	1	1	-1	-1
	33	103	1	1	-1	-1	-1	-1	-1	1	-1	1
	49	104	1	1	-1	-1	-1	-1	1	1	-1	-1
	134	105	-1	1	0	0	3.36359	0	0	0	0	0
	73	106	1	1	-1	-1	-1	1	-1	-1	1	-1
	126	107	1	1	1	-1	1	1	1	1	1	-1
	76	108	1	1	1	1	-1	1	-1	-1	1	-1
	77	109	1	1	-1	-1	1	1	-1	-1	1	1
	80	110	1	1	1	1	1	1	-1	-1	1	1
	106	111	1	1	1	-1	-1	1	-1	1	1	-1
	111	112	1	1	-1	1	1	1	-1	1	1	1
	114	113	1	1	1	-1	-1	-1	1	1	1	-1
	57	114	1	1	-1	-1	-1	1	1	1	-1	1
	110	115	1	1	1	-1	1	1	-1	1	1	1
	154	116	0	1	0	0	0	0	0	0	0	0
	14	117	1	1	1	-1	1	1	-1	-1	-1	1
	18	118	1	1	1	-1	-1	-1	1	-1	-1	-1
	34	119	1	1	1	-1	-1	-1	-1	1	-1	-1
	54	120	1	1	1	-1	1	-1	1	1	-1	-1
	137	121	-1	1	0	0	0	0	-3.36359	0	0	0
	50	122	1	1	1	-1	-1	-1	1	1	-1	1
	140	123	-1	1	0	0	0	0	0	3.36359	0	0
	32	124	1	1	1	1	1	1	1	-1	-1	1
	152	125	0	1	0	0	0	0	0	0	0	0
	148	126	0	1	0	0	0	0	0	0	0	0
	53	127	1	1	-1	-1	1	-1	1	1	-1	1
	82	128	1	1	1	-1	-1	-1	1	-1	1	1
	75	129	1	1	-1	1	-1	1	-1	-1	1	1
	127	130	1	1	-1	1	1	1	1	1	1	-1
	99	131	1	1	-1	1	-1	-1	-1	1	1	1
	60	132	1	1	1	1	-1	1	1	1	-1	1
	22	133	1	1	1	-1	1	-1	1	-1	-1	1
	24	134	1	1	1	1	1	-1	1	-1	-1	-1
	78	135	1	1	1	-1	1	1	-1	-1	1	-1
	55	136	1	1	-1	1	1	-1	1	1	-1	-1
	125	137	1	1	-1	-1	1	1	1	1	1	1
	41	138	1	1	-1	-1	-1	1	-1	1	-1	-1
	135	139	-1	1	0	0	0	-3.36359	0	0	0	0
	85	140	1	1	-1	-1	1	-1	1	-1	1	1
	35	141	1	1	-1	1	-1	-1	-1	1	-1	-1
	119	142	1	1	-1	1	1	-1	1	1	1	1
	132	143	-1	1	0	3.36359	0	0	0	0	0	0
	145	144	0	1	0	0	0	0	0	0	0	0
	45	145	1	1	-1	-1	1	1	-1	1	-1	1
	7	146	1	1	-1	1	1	-1	-1	-1	-1	-1
	120	147	1	1	1	1	1	-1	1	1	1	-1
	59	148	1	1	-1	1	-1	1	1	1	-1	-1
	97	149	1	1	-1	-1	-1	-1	-1	1	1	-1
	63	150	1	1	-1	1	1	1	1	1	-1	1
	124	151	1	1	1	1	-1	1	1	1	1	-1
	115	152	1	1	-1	1	-1	-1	1	1	1	-1
	117	153	1	1	-1	-1	1	-1	1	1	1	-1
	98	154	1	1	1	-1	-1	-1	-1	1	1	1
2	INPUT AND OUTPUT VARIABLES:
				INPUTS								OUTPUT	Important:
	Date	Hour	Label	X	Y	CP	PI	LT1defX	LT1defY	Or	BaO	IMFu*	*IMFu calculated using the formula of Equation 15, which includes the standard error of the real isotopic ratio obtained from n fluorination values of each standard (see Table 1).
	2014-07-22	12:38:00	Pattern1_ALBITE1@1	-1700	-5959	7.59e-09	5.93e-09	23	-17	91.2935	0.6224	0.984339
	2014-07-22	12:42:00	Pattern1_ALBITE1@2	-1607	-5923	7.4e-09	5.93e-09	25	-16	89.2373	0.7712	0.985558
	2014-07-22	12:46:00	Pattern1_ALBITE1@3	-1500	-5893	7.36e-09	5.93e-09	28	-17	88.9436	0.7072	0.986351
	2014-07-22	12:50:00	Pattern1_ALBITE1@4	-3447	-5178	7.29e-09	5.93e-09	14	25	89.9382	0.821	0.985184
	2014-07-22	12:54:00	Pattern1_ALBITE1@5	-3649	-5260	7.12e-09	5.92e-09	13	24	90.4026	0.6768	0.985383
	2014-07-22	12:58:00	Pattern1_ALBITE1@6	-3328	-5230	7.04e-09	5.93e-09	18	23	90.373	0.7119	0.984809
	2014-07-22	13:03:00	Pattern1_ALBITE1@7	-2498	-5758	7.04e-09	5.95e-09	11	-5	90.5484	0.9853	0.984381
	2014-07-22	13:07:00	Pattern1_ALBITE1@8	-2498	-5894	6.95e-09	5.98e-09	12	-10	89.9086	0.915	0.984853
	2014-07-22	13:11:00	Pattern1_ALBITE1@9	-2349	-5929	7.12e-09	5.99e-09	15	-11	91.2745	0.9895	0.984731
	2014-07-22	14:37:00	Pattern1_FK1@1	-3639	7553	6.46e-09	6.06e-09	60	47	93.1471	0	0.983753
	2014-07-22	14:42:00	Pattern1_FK1@2	-3479	7541	6.61e-09	6.08e-09	59	49	94.4548	0.124	0.984569
	2014-07-22	14:46:00	Pattern1_FK1@3	-3384	7417	6.61e-09	6.08e-09	62	47	93.6483	0.0206	0.983918
	2014-07-22	14:50:00	Pattern1_FK1@4	-5903	7198	6.61e-09	6.07e-09	50	9	94.4576	0.0465	0.984088
	2014-07-22	14:54:00	Pattern1_FK1@5	-5724	7116	6.51e-09	6.02e-09	51	12	93.9637	0.0621	0.983615
	2014-07-22	14:58:00	Pattern1_FK1@6	-5519	7072	6.55e-09	5.93e-09	50	11	94.5665	0.1292	0.983479
	2014-07-22	15:02:00	Pattern1_FK1@7	-5449	8632	6.51e-09	5.81e-09	20	42	95.361	0	0.983172
	2014-07-22	15:06:00	Pattern1_FK1@8	-5563	8599	6.83e-09	5.71e-09	14	38	94.0438	0.0517	0.983829
	2014-07-22	15:10:00	Pattern1_FK1@9	-5449	8528	6.72e-09	5.69e-09	23	45	94.6024	0	0.983046
	2014-07-23	11:39:00	TCSAU020_FK1@1	-8538	126	6.85e-09	5.77e-09	14	31	91.9531	0.0451	0.983615
	2014-07-23	11:43:00	TCSAU020_FK1@2	-8606	-18	6.74e-09	5.78e-09	13	31	92.7174	0.1152	0.984276
	2014-07-23	11:47:00	TCSAU020_FK1@3	-8656	67	6.53e-09	5.77e-09	15	34	92.1367	0.1202	0.983886
	2014-07-23	12:28:00	TCSAU020_FK1@13	-8434	107	6.18e-09	5.78e-09	21	25	90.975	0.0901	0.984107
	2014-07-23	12:32:00	TCSAU020_FK1@14	-8393	29	5.96e-09	5.81e-09	18	27	92.9717	0.0951	0.983688
	2014-07-23	12:36:00	TCSAU020_FK1@15	-8509	-50	5.99e-09	5.85e-09	13	29	91.7992	0.0451	0.983949
	2014-07-23	12:40:00	TCSAU020_AB1@16	-3943	-5841	6.14e-09	5.86e-09	-37	-37	90.3926	1.0863	0.984929
	2014-07-23	12:44:00	TCSAU020_AB1@17	-3767	-5906	6.3e-09	5.87e-09	-36	-42	90.3358	1.13	0.985216
	2014-07-23	12:48:00	TCSAU020_AB1@18	-3958	-6065	6.18e-09	5.87e-09	-40	-45	89.7796	0.9368	0.984791
	2014-07-23	13:38:00	TCSAU020_AB1@30	-3861	-5873	6.22e-09	5.83e-09	-29	-37	90.1099	1.1056	0.98531
	2014-07-23	13:42:00	TCSAU020_AB1@31	-3892	-6068	6.24e-09	5.82e-09	-33	-44	90.8861	1.17	0.985494
	2014-07-23	13:46:00	TCSAU020_AB1@32	-3928	-6137	6.14e-09	5.82e-09	-33	-47	89.4232	1.21	0.984781
	2014-07-23	20:21:00	TCBOA2_AB1@1	-7504	5496	1.02e-08	5.69e-09	-74	-54	89.0809	0.8964	0.982641
	2014-07-23	20:25:00	TCBOA2_AB1@2	-7560	5606	9.34e-09	5.68e-09	-81	-61	88.9057	0.9516	0.983133
	2014-07-23	20:29:00	TCBOA2_AB1@3	-7444	5599	9.24e-09	5.69e-09	-69	-58	88.3906	0.8671	0.982178
	2014-07-23	22:57:00	TCBOA2_AB1@39	-7434	5492	8.9e-09	5.62e-09	-59	-52	88.8597	0.8068	0.983736
	2014-07-23	23:01:00	TCBOA2_AB1@40	-7471	5432	8.34e-09	5.61e-09	-61	-49	89.994	0.9807	0.984384
	2014-07-23	23:05:00	TCBOA2_AB1@41	-7484	5570	7.99e-09	5.59e-09	-69	-55	89.1252	0.902	0.984821
	2014-07-23	23:10:00	TCBOA2_FK1@42	-19	7103	8.16e-09	5.6e-09	53	30	94.3673	0.055	0.983963
	2014-07-23	23:14:00	TCBOA2_FK1@43	-3	7285	8.48e-09	5.63e-09	51	34	91.3026	0.01	0.984063
	2014-07-23	23:18:00	TCBOA2_FK1@44	-123	7324	8.67e-09	5.68e-09	49	34	92.9039	0.06	0.983048
	2014-07-23	23:22:00	TCBOA2_FK1@45	-53	7369	8.58e-09	5.72e-09	47	33	93.63	0.04	0.983775
	2014-07-23	23:26:00	TCBOA2_FK1@46	-236	7249	8.46e-09	5.74e-09	43	32	94.375	0.1	0.983291
	2014-07-24	00:52:00	TCBOA2_FK1@67	-60	7296	8.2e-09	5.7e-09	49	31	93.79	0.05	0.984255
	2014-07-24	00:56:00	TCBOA2_FK1@68	-130	7375	8.2e-09	5.68e-09	48	32	93.49	0.02	0.984334
	2014-07-24	01:01:00	TCBOA2_FK1@69	-207	7442	8.16e-09	5.67e-09	46	33	93.2091	0.035	0.984073
	2014-07-24	01:05:00	TCBOA2_FK1@70	-360	7350	8.16e-09	5.66e-09	46	33	93.6161	0.0747	0.983768
	2014-07-24	11:53:00	TCCOL1_FK1@32	4050	7896	5.7e-09	6.04e-09	43	53	92.5844	0.045	0.983541
	2014-07-24	11:57:00	TCCOL1_FK1@33	4102	8075	5.72e-09	6.03e-09	46	55	93.2924	0.05	0.983743
	2014-07-24	12:01:00	TCCOL1_FK1@34	4002	8000	5.63e-09	6.02e-09	46	56	90.8822	0.0849	0.983499
	2014-07-24	12:38:00	TCCOL1_FK1@43	4099	7991	5.28e-09	6.04e-09	51	55	92.21	0.07	0.984143
	2014-07-24	12:42:00	TCCOL1_FK1@44	4065	8091	5.25e-09	6.03e-09	53	58	93.5457	0.05	0.983786
	2014-07-24	12:46:00	TCCOL1_FK1@45	3873	8043	5.23e-09	6.05e-09	51	62	93.5195	0.085	0.983698
	2014-07-24	14:50:00	TCBOA12_FK1@19	5218	-2445	6.14e-09	6.18e-09	20	29	91.5506	0.01	0.98475
	2014-07-24	14:54:00	TCBOA12_FK1@20	5299	-2454	6.24e-09	6.17e-09	22	30	90.9086	0.025	0.984864
	2014-07-24	14:58:00	TCBOA12_FK1@21	5315	-2364	6.3e-09	6.16e-09	22	29	92.4808	0.0701	0.984523
	2014-07-24	15:51:00	TCBOA12_FK1@34	5400	-2484	5.98e-09	5.95e-09	29	33	95.1595	0.05	0.985568
	2014-07-24	15:56:00	TCBOA12_FK1@35	5398	-2396	5.99e-09	5.95e-09	28	31	92.7161	0.03	0.985252
	2014-07-24	16:00:00	TCBOA12_FK1@36	5441	-2428	5.99e-09	5.95e-09	30	33	93.04	0	0.985307
	2014-07-24	17:56:00	CHR50_FK1@15	752	7445	8.64e-09	5.95e-09	29	13	93.3787	0.0414	0.984747
	2014-07-24	18:01:00	CHR50_FK1@16	817	7577	9.01e-09	5.94e-09	30	14	93.331	0.0363	0.98464
	2014-07-24	18:05:00	CHR50_FK1@17	718	7591	9.1e-09	5.94e-09	31	17	92.7411	0.1138	0.984596
	2014-07-24	18:29:00	CHR50_FK1@23	763	7649	8.7e-09	5.91e-09	32	17	94.2818	0.0207	0.984854
	2014-07-24	18:33:00	CHR50_FK1@24	678	7395	8.88e-09	5.9e-09	31	16	92.9433	0.0414	0.984906
	2014-07-24	18:37:00	CHR50_FK1@25	721	7310	8.93e-09	5.88e-09	30	15	92.1035	0.03	0.985029
	2014-07-24	20:23:00	CHR10_FK1@1	-2641	-5621	8.48e-09	5.87e-09	5	-53	93.6924	0.0752	0.982498
	2014-07-24	20:27:00	CHR10_FK1@2	-2350	-5566	7.89e-09	5.85e-09	8	-56	93.5953	0	0.982626
	2014-07-24	20:31:00	CHR10_FK1@3	-2490	-5666	7.77e-09	5.84e-09	10	-56	93.2194	0.0501	0.982503
	2014-07-24	20:35:00	CHR10_FK1@4	-2513	-5533	7.64e-09	5.85e-09	11	-53	93.7171	0	0.983034
	2014-07-24	20:39:00	CHR10_FK1@5	-2320	-5471	7.59e-09	5.85e-09	13	-53	91.6364	0.01	0.982846
	2014-07-24	23:12:00	CHR10_FK1@42	-2522	-5611	7.57e-09	5.84e-09	11	-55	93.0173	0.0201	0.984245
	2014-07-24	23:17:00	CHR10_FK1@43	-2405	-5544	7.27e-09	5.81e-09	17	-57	93.6651	0.0802	0.984242
	2014-07-24	23:21:00	CHR10_FK1@44	-2612	-5560	7.04e-09	5.87e-09	8	-54	90.3633	0.005	0.982636
	2014-07-24	23:25:00	CHR10_FK1@45	-2383	-5456	6.94e-09	5.99e-09	16	-56	93.2512	0.0401	0.982752
	2014-07-24	23:33:00	CHR10_AB1@47	5149	-2304	6.92e-09	6.15e-09	0	10	88.75	1.0198	0.984697
	2014-07-24	23:37:00	CHR10_AB1@48	5038	-2320	7.27e-09	6.19e-09	-1	9	89.2551	0.7976	0.985107
	2014-07-24	23:41:00	CHR10_AB1@49	5098	-2396	7.31e-09	6.16e-09	-3	11	89.6154	0.8865	0.985433
	2014-07-24	23:46:00	CHR10_AB1@50	5191	-2359	7.31e-09	6.13e-09	-3	8	89.3577	0.9707	0.986368
	2014-07-24	23:50:00	CHR10_AB1@51	5281	-2347	7.44e-09	6.1e-09	1	8	89.3277	0.99	0.986408
	2014-07-25	01:54:00	CHR10_AB1@81	5205	-2440	6.46e-09	5.75e-09	0	-1	89.3199	1.0546	0.986417
	2014-07-25	01:58:00	CHR10_AB1@82	5232	-2275	6.85e-09	5.75e-09	-4	-3	89.2747	0.8773	0.986228
	2014-07-25	02:02:00	CHR10_AB1@83	5059	-2457	6.74e-09	5.79e-09	-3	-5	89.8744	0.7719	0.985442
	2014-07-25	02:06:00	CHR10_AB1@84	5292	-2412	6.94e-09	5.88e-09	-4	-1	89.2098	0.961	0.986173
	2014-07-25	02:10:00	CHR10_AB1@85	5126	-2459	6.9e-09	6e-09	-7	-4	89.5105	0.9165	0.984942
	2014-07-25	09:54:00	MOR59_AB1@1	1112	8463	9.95e-09	5.9e-09	39	81	88.7568	0.9163	0.985617
	2014-07-25	09:58:00	MOR59_AB1@2	1181	8332	9.78e-09	5.89e-09	40	78	88.784	1.0247	0.985648
	2014-07-25	10:02:00	MOR59_AB1@3	998	8350	9.43e-09	5.89e-09	41	78	89.7075	1.0157	0.985664
	2014-07-25	11:12:00	MOR59_AB1@20	1194	8417	7.61e-09	6.06e-09	44	83	89.71	0.95	0.986135
	2014-07-25	11:16:00	MOR59_AB1@21	1261	8344	7.66e-09	6.06e-09	46	81	89.72	0.91	0.986396
	2014-07-25	11:20:00	MOR59_AB1@22	953	8460	7.59e-09	6.05e-09	41	86	89.717	0.8663	0.985911
	2014-07-25	12:15:00	MOR59_FK1@35	5874	7059	7.12e-09	5.84e-09	94	4	94.8266	0.0849	0.9877
	2014-07-25	12:19:00	MOR59_FK1@36	5875	6926	7.27e-09	5.82e-09	91	6	94.3995	0.0499	0.987186
	2014-07-25	12:23:00	MOR59_FK1@37	5760	7110	7.4e-09	5.79e-09	95	8	94.285	0.0899	0.987269
	2014-07-25	13:00:00	MOR59_FK1@46	5804	7204	6.85e-09	5.75e-09	100	7	93.6179	0	0.987445
	2014-07-25	13:05:00	MOR59_FK1@47	5710	7028	6.74e-09	5.86e-09	91	10	93.8625	0	0.987292
	2014-07-25	13:09:00	MOR59_FK1@48	5824	6841	7.02e-09	5.96e-09	85	11	90.6055	0.02	0.986742
	2014-07-25	16:08:00	MOR61_FK1@25	-158	-6260	4.97e-09	5.78e-09	-1	3	92.07	0.04	0.983629
	2014-07-25	16:12:00	MOR61_FK1@26	-280	-6396	4.92e-09	5.8e-09	-7	-4	93.5363	0.01	0.983735
	2014-07-25	16:17:00	MOR61_FK1@27	-130	-6449	4.95e-09	5.81e-09	-1	-6	89.9014	0.035	0.984139
	2014-07-25	16:54:00	MOR61_FK1@36	-305	-6507	4.97e-09	5.78e-09	-6	-8	94.0792	0	0.98388
	2014-07-25	16:58:00	MOR61_FK1@37	-223	-6313	4.95e-09	5.78e-09	-3	-5	93.8726	0.0449	0.984324
	2014-07-25	17:02:00	MOR61_FK1@38	-60	-6614	4.85e-09	5.77e-09	1	-14	94.1099	0.02	0.985085
3	FITTED MODEL:
	ANOVA results and summary statistics of the additional K-feldspar model
		DG	SS	MS	F	Coeff	VIF	p-value
	Source
	Model	14	0.000125	9e-06	38.57	_	_	0
	Linear	8	8e-05	1e-05	43.28	_	_	0
	Interaction	4	2.4e-05	6e-06	25.9	_	_	0
	Square	2	1.4e-05	7e-06	30.29	_	_	0
	Terms
	Constant					0.984263		0
	X	1	9e-06	9e-06	38.39	0.00076	2.38	0
	Y	1	0	0	0.35	-0.0001	7.53	0.554
	CP	1	0	0	0	8e-06	5.4	0.973
	PI	1	0	0	0.76	-0.00014	2.63	0.385
	LT1defX	1	1.9e-05	1.9e-05	83.94	0.002786	6.39	0
	LT1defY	1	1e-06	1e-06	3.36	-0.000338	3.99	0.07
	Or	1	0	0	0.08	5e-05	4.47	0.78
	BaO	1	1.1e-05	1.1e-05	48.66	0.001023	4.75	0
	X2	1	9e-06	9e-06	39.12	0.001003	1.56	0
	CP2	1	3e-06	3e-06	12.2	-0.001015	2.66	0.001
	Y × CP	1	6e-06	6e-06	25.81	0.001232	3.58	0
	CP × PI	1	6e-06	6e-06	27.69	0.002094	2.83	0
	PI × LT1defY	1	5e-06	5e-06	21.11	0.001827	3.52	0
	LT1defY × BaO	1	2e-06	2e-06	8.31	-0.00056	2.66	0.005
	Error	85	2e-05	0
	Total	99	0.000144
	Summary statistics		S	R2	Adj-R2	Pred-R2
			0.0004805	0.864	0.8416	0.8154
4	RESULTS:								5	TOTAL UNCERTAINTY:		(2) From 2.K-feldspar model
		Fitted		Standardized	Leverage	Cook	Prediction	Prediction SE		Predicted	Predicted	18O/16O	d18O	d18O	Total
	Label	IMFu	Residuals	Residual	Hi	Distance	IMFu	IMFu		IMF (2)	IMF 1σ (2)	SIMS	by IMF+1σ	by IMFu+1σ	Uncertainty
	Pattern1_ALBITE1@1	0.984899	-0.0005607	-1.24343	-1.24749	0.119011	0.984899	0.0001657		0.984913	0.0001475	0.0019923	8.63523	8.97037	0.335142
	Pattern1_ALBITE1@2	0.985303	0.0002552	0.57277	0.57049	0.140345	0.985303	0.00018		0.985275	0.0001637	0.0019947	9.4627	9.7862	0.3235
	Pattern1_ALBITE1@3	0.985294	0.0010563	2.3953	2.46584	0.157559	0.985294	0.0001907		0.98526	0.0001735	0.0019963	10.2778	10.6164	0.338638
	Pattern1_ALBITE1@4	0.984642	0.000542	1.18697	1.18987	0.096686	0.984642	0.0001494		0.984725	0.0001398	0.001994	9.69648	10.0782	0.381729
	Pattern1_ALBITE1@5	0.98444	0.0009427	2.05203	2.09241	0.085825	0.98444	0.0001408		0.984558	0.000132	0.0019944	10.0783	10.4793	0.401035
	Pattern1_ALBITE1@6	0.984673	0.0001359	0.29566	0.29407	0.084741	0.984673	0.0001399		0.984758	0.0001296	0.0019932	9.26802	9.63143	0.363406
	Pattern1_ALBITE1@7	0.985159	-0.0007786	-1.69107	-1.71011	0.081741	0.985159	0.0001374		0.985105	0.0001281	0.0019923	8.45853	8.67507	0.216532
	Pattern1_ALBITE1@8	0.985054	-0.0002016	-0.43672	-0.43463	0.077285	0.985054	0.0001336		0.98495	0.000128	0.0019933	9.12357	9.28504	0.161473
	Pattern1_ALBITE1@9	0.985334	-0.0006026	-1.33244	-1.33863	0.113861	0.985334	0.0001621		0.985187	0.0001507	0.001993	8.70577	8.87553	0.169761
	Pattern1_FK1@1	0.984132	-0.0003791	-0.84349	-0.84204	0.12494	0.984132	0.0001698		0.984389	0.0001585	0.0019912	8.6036	9.20356	0.599958
	Pattern1_FK1@2	0.98445	0.0001186	0.2665	0.26504	0.142013	0.98445	0.0001811		0.984691	0.0001672	0.0019929	9.14624	9.75043	0.604195
	Pattern1_FK1@3	0.984447	-0.000529	-1.19325	-1.19627	0.148533	0.984447	0.0001852		0.984671	0.0001673	0.0019916	8.50833	9.09904	0.590702
	Pattern1_FK1@4	0.98394	0.0001479	0.33811	0.33634	0.17096	0.98394	0.0001987		0.983695	0.0002081	0.0019919	9.61898	9.78504	0.166056
	Pattern1_FK1@5	0.983909	-0.0002933	-0.65522	-0.65301	0.132089	0.983909	0.0001746		0.983811	0.0001791	0.0019909	9.0229	9.28517	0.262273
	Pattern1_FK1@6	0.984047	-0.0005685	-1.2613	-1.26576	0.120055	0.984047	0.0001665		0.984143	0.0001595	0.0019907	8.60132	9.03392	0.432603
	Pattern1_FK1@7	0.983067	0.000105	0.23877	0.23744	0.162564	0.983067	0.0001937		0.983226	0.0001823	0.00199	9.16345	9.71276	0.54931
	Pattern1_FK1@8	0.983319	0.0005108	1.1541	1.15639	0.151539	0.983319	0.000187		0.983209	0.0001903	0.0019914	9.88265	10.1572	0.274573
	Pattern1_FK1@9	0.983454	-0.0004085	-0.93109	-0.93035	0.166116	0.983454	0.0001958		0.983356	0.0001966	0.0019898	8.91398	9.21606	0.302082
	TCSAU020_FK1@1	0.983935	-0.0003208	-0.72793	-0.7259	0.15874	0.983935	0.0001914		0.984169	0.0001797	0.0019909	8.65531	9.27573	0.620423
	TCSAU020_FK1@2	0.98404	0.0002355	0.53231	0.53005	0.15209	0.98404	0.0001874		0.984254	0.0001758	0.0019923	9.28144	9.87356	0.592118
	TCSAU020_FK1@3	0.984139	-0.0002532	-0.57373	-0.57145	0.155979	0.984139	0.0001898		0.984335	0.0001779	0.0019915	8.79101	9.36894	0.577932
	TCSAU020_FK1@13	0.984139	-3.18e-05	-0.07276	-0.07233	0.174183	0.984139	0.0002005		0.984473	0.0001838	0.0019919	8.84617	9.58266	0.736483
	TCSAU020_FK1@14	0.983975	-0.0002861	-0.64245	-0.64021	0.140859	0.983975	0.0001803		0.984293	0.0001651	0.0019911	8.64453	9.32469	0.680157
	TCSAU020_FK1@15	0.983623	0.0003258	0.73737	0.73537	0.154116	0.983623	0.0001886		0.983984	0.0001693	0.0019916	9.21029	9.94803	0.737742
	TCSAU020_AB1@16	0.984612	0.0003167	0.69798	0.69586	0.107901	0.984612	0.0001578		0.984721	0.0001412	0.0019934	9.39532	9.81366	0.418337
	TCSAU020_AB1@17	0.984718	0.0004972	1.10349	1.10492	0.120512	0.984718	0.0001668		0.984847	0.000149	0.001994	9.56199	10.0181	0.456099
	TCSAU020_AB1@18	0.984185	0.0006059	1.33842	1.34477	0.112357	0.984185	0.000161		0.984324	0.0001393	0.0019932	9.70301	10.1538	0.450764
	TCSAU020_AB1@30	0.985071	0.0002383	0.52153	0.51929	0.095277	0.985071	0.0001483		0.985235	0.0001376	0.0019942	9.27737	9.73839	0.461025
	TCSAU020_AB1@31	0.985287	0.0002067	0.46189	0.45974	0.132313	0.985287	0.0001748		0.985511	0.0001666	0.0019946	9.16744	9.74665	0.579206
	TCSAU020_AB1@32	0.985428	-0.0006472	-1.45982	-1.46975	0.148586	0.985428	0.0001852		0.985689	0.000175	0.0019931	8.21786	8.85354	0.635686
	TCBOA2_AB1@1	0.982246	0.0003949	1.04351	1.04407	0.379662	0.982246	0.000296		0.982333	0.000277	0.0019888	9.37428	10.0527	0.678433
	TCBOA2_AB1@2	0.983122	1.08e-05	0.02475	0.0246	0.180051	0.983122	0.0002039		0.983184	0.0001911	0.0019898	9.09609	9.56526	0.469171
	TCBOA2_AB1@3	0.983118	-0.0009399	-2.13639	-2.18321	0.161573	0.983118	0.0001931		0.983288	0.0001807	0.0019879	8.03659	8.59428	0.557693
	TCBOA2_AB1@39	0.983426	0.0003095	0.71053	0.70845	0.17816	0.983426	0.0002028		0.983544	0.0001901	0.001991	9.33617	9.86064	0.524469
	TCBOA2_AB1@40	0.984273	0.0001111	0.25753	0.25611	0.19307	0.984273	0.0002111		0.984294	0.000189	0.0019923	9.2269	9.65877	0.431869
	TCBOA2_AB1@41	0.98434	0.000481	1.17964	1.1824	0.279704	0.98434	0.0002541		0.98436	0.0002242	0.0019932	9.57903	10.0902	0.511209
	TCBOA2_FK1@42	0.983833	0.0001299	0.2962	0.2946	0.166413	0.983833	0.000196		0.984144	0.0001733	0.0019917	9.0928	9.79071	0.697906
	TCBOA2_FK1@43	0.983671	0.0003913	0.9137	0.91281	0.2053	0.983671	0.0002177		0.983882	0.000199	0.0019919	9.43646	10.0807	0.644284
	TCBOA2_FK1@44	0.983868	-0.0008199	-1.81614	-1.84151	0.117087	0.983868	0.0001644		0.984039	0.0001533	0.0019898	8.25821	8.75911	0.500899
	TCBOA2_FK1@45	0.984063	-0.0002875	-0.62499	-0.62273	0.083341	0.984063	0.0001387		0.984245	0.0001301	0.0019913	8.83091	9.29312	0.462211
	TCBOA2_FK1@46	0.984172	-0.0008811	-1.91419	-1.94528	0.082063	0.984172	0.0001376		0.984307	0.0001298	0.0019903	8.26109	8.6734	0.412307
	TCBOA2_FK1@67	0.984146	0.0001093	0.2371	0.23578	0.080149	0.984146	0.000136		0.984363	0.000126	0.0019922	9.17009	9.66134	0.491248
	TCBOA2_FK1@68	0.983996	0.0003379	0.73799	0.736	0.091626	0.983996	0.0001454		0.9842	0.0001349	0.0019924	9.42941	9.9263	0.496891
	TCBOA2_FK1@69	0.983951	0.0001224	0.26825	0.26678	0.097504	0.983951	0.00015		0.984104	0.0001411	0.0019919	9.26816	9.72376	0.455596
	TCBOA2_FK1@70	0.983952	-0.0001839	-0.40369	-0.40169	0.101013	0.983952	0.0001527		0.984087	0.0001443	0.0019913	8.9783	9.42136	0.443056
	TCCOL1_FK1@32	0.983814	-0.0002735	-0.60295	-0.60068	0.108899	0.983814	0.0001585		0.984078	0.0001483	0.0019908	8.73008	9.31543	0.58535
	TCCOL1_FK1@33	0.984006	-0.0002622	-0.57662	-0.57434	0.104086	0.984006	0.000155		0.984254	0.0001458	0.0019912	8.75493	9.31762	0.562692
	TCCOL1_FK1@34	0.983902	-0.0004033	-0.92069	-0.91985	0.168705	0.983902	0.0001973		0.984141	0.0001842	0.0019907	8.57806	9.21425	0.63619
	TCCOL1_FK1@43	0.983588	0.0005555	1.28259	1.28754	0.187436	0.983588	0.000208		0.983766	0.0001951	0.001992	9.61015	10.2068	0.5966
	TCCOL1_FK1@44	0.983638	0.0001482	0.3432	0.34141	0.192015	0.983638	0.0002105		0.983843	0.0001975	0.0019913	9.17393	9.80298	0.629049
	TCCOL1_FK1@45	0.98345	0.0002478	0.57779	0.57551	0.203348	0.98345	0.0002167		0.983732	0.0002033	0.0019911	9.18046	9.90099	0.720526
	TCBOA12_FK1@19	0.984223	0.0005268	1.22679	1.23049	0.201094	0.984223	0.0002155		0.984542	0.0002029	0.0019932	9.41428	10.1707	0.756439
	TCBOA12_FK1@20	0.984492	0.0003716	0.85732	0.85597	0.186084	0.984492	0.0002073		0.984802	0.0001965	0.0019935	9.30628	10.0382	0.731946
	TCBOA12_FK1@21	0.984658	-0.0001344	-0.30683	-0.30519	0.169253	0.984658	0.0001977		0.984919	0.0001866	0.0019928	8.84218	9.50346	0.661282
	TCBOA12_FK1@34	0.985445	0.0001233	0.28999	0.28842	0.216556	0.985445	0.0002236		0.985534	0.0001985	0.0019949	9.26302	9.78659	0.523572
	TCBOA12_FK1@35	0.985334	-8.24e-05	-0.18132	-0.18028	0.104833	0.985334	0.0001556		0.98543	0.000136	0.0019943	9.12991	9.52694	0.397023
	TCBOA12_FK1@36	0.98539	-8.34e-05	-0.18513	-0.18407	0.121358	0.98539	0.0001674		0.985505	0.000146	0.0019944	9.09349	9.53227	0.43878
	CHR50_FK1@15	0.984646	0.0001005	0.22533	0.22407	0.138314	0.984646	0.0001787		0.984854	0.0001675	0.0019932	9.13083	9.69891	0.568084
	CHR50_FK1@16	0.984715	-7.51e-05	-0.17096	-0.16998	0.163952	0.984715	0.0001945		0.984976	0.0001834	0.001993	8.88833	9.54304	0.654713
	CHR50_FK1@17	0.984866	-0.0002701	-0.61653	-0.61427	0.168278	0.984866	0.0001971		0.985136	0.0001863	0.0019929	8.67092	9.34024	0.669327
	CHR50_FK1@23	0.984603	0.0002519	0.55859	0.55632	0.118853	0.984603	0.0001656		0.984828	0.0001553	0.0019935	9.32185	9.88155	0.559699
	CHR50_FK1@24	0.984522	0.0003843	0.84831	0.8469	0.110805	0.984522	0.0001599		0.984765	0.0001506	0.0019936	9.44187	10.0095	0.567602
	CHR50_FK1@25	0.984368	0.0006608	1.46095	1.47091	0.113728	0.984368	0.000162		0.984614	0.0001523	0.0019938	9.69619	10.271	0.574811
	CHR10_FK1@1	0.982561	-6.35e-05	-0.15182	-0.15095	0.243075	0.982561	0.0002369		0.982838	0.0002235	0.0019887	8.85997	9.61729	0.75732
	CHR10_FK1@2	0.982837	-0.0002109	-0.47224	-0.47007	0.135962	0.982837	0.0001772		0.983125	0.0001672	0.0019889	8.72471	9.37388	0.649174
	CHR10_FK1@3	0.983074	-0.0005709	-1.26123	-1.26569	0.112396	0.983074	0.0001611		0.983415	0.000154	0.0019887	8.33942	9.01249	0.673072
	CHR10_FK1@4	0.983063	-2.9e-05	-0.06408	-0.0637	0.113956	0.983063	0.0001622		0.983342	0.0001531	0.0019898	8.97297	9.58303	0.610064
	CHR10_FK1@5	0.983152	-0.0003064	-0.67982	-0.67765	0.120252	0.983152	0.0001666		0.983436	0.0001563	0.0019894	8.67045	9.29321	0.622758
	CHR10_FK1@42	0.983137	0.0011079	2.4365	2.51141	0.104385	0.983137	0.0001552		0.983464	0.0001473	0.0019922	10.0706	10.7174	0.646848
	CHR10_FK1@43	0.983633	0.0006093	1.33783	1.34417	0.101475	0.983633	0.0001531		0.984129	0.000154	0.0019922	9.3813	10.2056	0.824251
	CHR10_FK1@44	0.983165	-0.0005291	-1.22703	-1.23074	0.194589	0.983165	0.0002119		0.98332	0.0001986	0.001989	8.54321	9.12343	0.580222
	CHR10_FK1@45	0.983377	-0.0006257	-1.41344	-1.42191	0.151145	0.983377	0.0001868		0.982861	0.0002322	0.0019892	9.08108	8.98152	0.0995544
	CHR10_AB1@47	0.985561	-0.0008638	-1.93886	-1.97151	0.140138	0.985561	0.0001799		0.985568	0.000162	0.001993	8.30432	8.66134	0.357017
	CHR10_AB1@48	0.985243	-0.000136	-0.3069	-0.30526	0.149769	0.985243	0.0001859		0.985432	0.0001582	0.0019938	8.85214	9.39812	0.545978
	CHR10_AB1@49	0.985389	4.38e-05	0.09825	0.09767	0.138064	0.985389	0.0001785		0.985599	0.0001507	0.0019945	9.04304	9.59528	0.552243
	CHR10_AB1@50	0.985645	0.0007231	1.60781	1.6232	0.123839	0.985645	0.0001691		0.985733	0.0001495	0.0019964	9.86822	10.2849	0.416664
	CHR10_AB1@51	0.985997	0.0004109	0.904	0.90302	0.10507	0.985997	0.0001557		0.986008	0.0001454	0.0019964	9.59081	9.91043	0.319619
	CHR10_AB1@81	0.986996	-0.0005786	-1.29958	-1.30494	0.141365	0.986996	0.0001806		0.986772	0.0001622	0.0019965	8.84262	8.96407	0.121452
	CHR10_AB1@82	0.98647	-0.000242	-0.54403	-0.54177	0.143007	0.98647	0.0001817		0.986269	0.0001596	0.0019961	9.15748	9.30103	0.143553
	CHR10_AB1@83	0.986169	-0.0007272	-1.59976	-1.61481	0.104761	0.986169	0.0001555		0.986026	0.0001394	0.0019945	8.6177	8.77308	0.155382
	CHR10_AB1@84	0.986226	-5.3e-05	-0.11519	-0.11452	0.081737	0.986226	0.0001374		0.986021	0.0001344	0.001996	9.38648	9.45486	0.0683783
	CHR10_AB1@85	0.985643	-0.0007007	-1.52351	-1.53564	0.083617	0.985643	0.0001389		0.985492	0.0001437	0.0019935	8.65378	8.78847	0.134691
	MOR59_AB1@1	0.985695	-7.79e-05	-0.18914	-0.18806	0.264299	0.985695	0.000247		0.985671	0.0002321	0.0019948	9.03779	9.50378	0.465994
	MOR59_AB1@2	0.985801	-0.0001526	-0.36562	-0.36375	0.245515	0.985801	0.0002381		0.98562	0.0002279	0.0019949	9.14487	9.43669	0.291819
	MOR59_AB1@3	0.985853	-0.0001894	-0.44088	-0.43878	0.20042	0.985853	0.0002151		0.985628	0.0002074	0.0019949	9.15767	9.35988	0.202213
	MOR59_AB1@20	0.985936	0.0001985	0.46618	0.46402	0.214829	0.985936	0.0002227		0.986296	0.0002217	0.0019959	8.96523	9.78861	0.823375
	MOR59_AB1@21	0.986063	0.0003331	0.76981	0.76795	0.189124	0.986063	0.0002089		0.986414	0.0002106	0.0019964	9.10864	9.89732	0.788675
	MOR59_AB1@22	0.985635	0.0002763	0.63972	0.63748	0.192141	0.985635	0.0002106		0.986083	0.0002151	0.0019954	8.93706	9.83161	0.894547
	MOR59_FK1@35	0.987313	0.0003874	0.88963	0.88853	0.17851	0.987313	0.000203		0.987539	0.0001904	0.0019992	9.39365	10.027	0.633383
	MOR59_FK1@36	0.987133	5.27e-05	0.11911	0.11842	0.150986	0.987133	0.0001867		0.987468	0.0001773	0.0019982	8.97466	9.68926	0.714601
	MOR59_FK1@37	0.987145	0.0001245	0.28326	0.28172	0.163704	0.987145	0.0001944		0.987644	0.0001853	0.0019983	8.8372	9.73539	0.898186
	MOR59_FK1@46	0.986829	0.0006162	1.44203	1.45139	0.209083	0.986829	0.0002197		0.98764	0.0001958	0.0019987	9.0325	10.2869	1.25438
	MOR59_FK1@47	0.986927	0.0003655	0.81631	0.8147	0.131406	0.986927	0.0001742		0.987059	0.0001613	0.0019984	9.51005	9.98833	0.478282
	MOR59_FK1@48	0.987257	-0.0005153	-1.243	-1.24705	0.255462	0.987257	0.0002428		0.986927	0.0002091	0.0019973	9.04044	9.16506	0.12462
	MOR61_FK1@25	0.984267	-0.0006377	-1.43533	-1.44448	0.144947	0.984267	0.0001829		0.984441	0.0001708	0.001991	8.43643	8.97719	0.540759
	MOR61_FK1@26	0.98391	-0.0001754	-0.39493	-0.39297	0.145304	0.98391	0.0001831		0.984076	0.0001717	0.0019912	8.91082	9.44495	0.534133
	MOR61_FK1@27	0.984002	0.0001368	0.32716	0.32543	0.242056	0.984002	0.0002364		0.984203	0.0002213	0.001992	9.1351	9.81079	0.675687
	MOR61_FK1@36	0.984093	-0.0002124	-0.48084	-0.47866	0.154817	0.984093	0.000189		0.9843	0.0001767	0.0019915	8.82811	9.41531	0.587208
	MOR61_FK1@37	0.984234	8.96e-05	0.20203	0.20089	0.147585	0.984234	0.0001846		0.984437	0.0001726	0.0019924	9.14778	9.72227	0.574488
	MOR61_FK1@38	0.984414	0.0006702	1.5386	1.55128	0.178124	0.984414	0.0002028		0.984729	0.0001918	0.0019939	9.58844	10.3163	0.727897
															0.515183	average
															0.203153	standard deviation

## Sheet: 6.Quartz additional model
	6.Quartz Additional Response Surface Model, Rsu Quartz
	From row 4 to 226
1	MODEL DESIGN:
	Central Composite Design
	Factors:		6		Cube points:		64
	Base runs:		90		Center points in cube:		14
	Base blocks:		1		Axial points:		12
	Replicates:		1		Center points in axial:		0
	Total runs:		90		α		2.82843
	Total blocks:		1
					design matrix
	StdOrder	RunOrder	PtType	Blocks	A	B	C	D	E	F
	79	1	0	1	0	0	0	0	0	0
	29	2	1	1	-1	-1	1	1	1	-1
	45	3	1	1	-1	-1	1	1	-1	1
	68	4	-1	1	0	2.82843	0	0	0	0
	32	5	1	1	1	1	1	1	1	-1
	61	6	1	1	-1	-1	1	1	1	1
	34	7	1	1	1	-1	-1	-1	-1	1
	18	8	1	1	1	-1	-1	-1	1	-1
	17	9	1	1	-1	-1	-1	-1	1	-1
	71	10	-1	1	0	0	0	-2.82843	0	0
	28	11	1	1	1	1	-1	1	1	-1
	64	12	1	1	1	1	1	1	1	1
	3	13	1	1	-1	1	-1	-1	-1	-1
	43	14	1	1	-1	1	-1	1	-1	1
	7	15	1	1	-1	1	1	-1	-1	-1
	67	16	-1	1	0	-2.82843	0	0	0	0
	11	17	1	1	-1	1	-1	1	-1	-1
	53	18	1	1	-1	-1	1	-1	1	1
	78	19	0	1	0	0	0	0	0	0
	39	20	1	1	-1	1	1	-1	-1	1
	19	21	1	1	-1	1	-1	-1	1	-1
	87	22	0	1	0	0	0	0	0	0
	80	23	0	1	0	0	0	0	0	0
	5	24	1	1	-1	-1	1	-1	-1	-1
	31	25	1	1	-1	1	1	1	1	-1
	22	26	1	1	1	-1	1	-1	1	-1
	54	27	1	1	1	-1	1	-1	1	1
	41	28	1	1	-1	-1	-1	1	-1	1
	65	29	-1	1	-2.82843	0	0	0	0	0
	70	30	-1	1	0	0	2.82843	0	0	0
	40	31	1	1	1	1	1	-1	-1	1
	33	32	1	1	-1	-1	-1	-1	-1	1
	36	33	1	1	1	1	-1	-1	-1	1
	88	34	0	1	0	0	0	0	0	0
	84	35	0	1	0	0	0	0	0	0
	1	36	1	1	-1	-1	-1	-1	-1	-1
	55	37	1	1	-1	1	1	-1	1	1
	83	38	0	1	0	0	0	0	0	0
	57	39	1	1	-1	-1	-1	1	1	1
	26	40	1	1	1	-1	-1	1	1	-1
	8	41	1	1	1	1	1	-1	-1	-1
	2	42	1	1	1	-1	-1	-1	-1	-1
	24	43	1	1	1	1	1	-1	1	-1
	14	44	1	1	1	-1	1	1	-1	-1
	90	45	0	1	0	0	0	0	0	0
	20	46	1	1	1	1	-1	-1	1	-1
	81	47	0	1	0	0	0	0	0	0
	25	48	1	1	-1	-1	-1	1	1	-1
	15	49	1	1	-1	1	1	1	-1	-1
	49	50	1	1	-1	-1	-1	-1	1	1
	46	51	1	1	1	-1	1	1	-1	1
	30	52	1	1	1	-1	1	1	1	-1
	38	53	1	1	1	-1	1	-1	-1	1
	6	54	1	1	1	-1	1	-1	-1	-1
	60	55	1	1	1	1	-1	1	1	1
	77	56	0	1	0	0	0	0	0	0
	51	57	1	1	-1	1	-1	-1	1	1
	44	58	1	1	1	1	-1	1	-1	1
	58	59	1	1	1	-1	-1	1	1	1
	52	60	1	1	1	1	-1	-1	1	1
	50	61	1	1	1	-1	-1	-1	1	1
	76	62	-1	1	0	0	0	0	0	2.82843
	10	63	1	1	1	-1	-1	1	-1	-1
	73	64	-1	1	0	0	0	0	-2.82843	0
	69	65	-1	1	0	0	-2.82843	0	0	0
	9	66	1	1	-1	-1	-1	1	-1	-1
	63	67	1	1	-1	1	1	1	1	1
	75	68	-1	1	0	0	0	0	0	-2.82843
	82	69	0	1	0	0	0	0	0	0
	27	70	1	1	-1	1	-1	1	1	-1
	56	71	1	1	1	1	1	-1	1	1
	13	72	1	1	-1	-1	1	1	-1	-1
	16	73	1	1	1	1	1	1	-1	-1
	42	74	1	1	1	-1	-1	1	-1	1
	37	75	1	1	-1	-1	1	-1	-1	1
	72	76	-1	1	0	0	0	2.82843	0	0
	59	77	1	1	-1	1	-1	1	1	1
	85	78	0	1	0	0	0	0	0	0
	86	79	0	1	0	0	0	0	0	0
	4	80	1	1	1	1	-1	-1	-1	-1
	48	81	1	1	1	1	1	1	-1	1
	23	82	1	1	-1	1	1	-1	1	-1
	74	83	-1	1	0	0	0	0	2.82843	0
	66	84	-1	1	2.82843	0	0	0	0	0
	21	85	1	1	-1	-1	1	-1	1	-1
	62	86	1	1	1	-1	1	1	1	1
	35	87	1	1	-1	1	-1	-1	-1	1
	47	88	1	1	-1	1	1	1	-1	1
	12	89	1	1	1	1	-1	1	-1	-1
	89	90	0	1	0	0	0	0	0	0
2	INPUT AND OUTPUT VARIABLES:
				INPUTS						OUTPUT	Important:
	Date	Hour	Label	X	Y	CP	PI	LT1defX	LT1defY	IMFu*	*IMFu calculated using the formula of Equation 15, which includes the standard error of the real isotopic ratio obtained from n fluorination values of each standard (see Table 1).
	2014-07-22	16:55:00	Pattern3_QUARS@1	-6993	-664	6.9e-09	6.11e-09	38	10	0.97998
	2014-07-22	16:59:00	Pattern3_QUARS@2	-6744	-717	6.85e-09	6.09e-09	46	9	0.980072
	2014-07-22	17:03:00	Pattern3_QUARS@3	-6925	-870	6.9e-09	6.07e-09	41	-8	0.980639
	2014-07-22	17:07:00	Pattern3_QUARS@4	-5453	-1711	6.95e-09	6.05e-09	46	36	0.980381
	2014-07-22	17:11:00	Pattern3_QUARS@5	-5705	-1943	6.94e-09	6.04e-09	53	35	0.981667
	2014-07-22	17:15:00	Pattern3_QUARS@6	-5772	-2135	6.9e-09	6.02e-09	52	37	0.981178
	2014-07-22	17:19:00	Pattern3_QUARS@7	-7772	-2695	6.98e-09	6e-09	-15	82	0.980681
	2014-07-22	17:23:00	Pattern3_QUARS@8	-7729	-2807	6.92e-09	5.99e-09	-14	80	0.981027
	2014-07-22	17:28:00	Pattern3_QUARS@9	-7902	-2893	6.81e-09	5.97e-09	-18	79	0.980906
	2014-07-23	14:23:00	TCSAU020_Q@33	7033	5535	6.92e-09	5.77e-09	30	-2	0.981172
	2014-07-23	14:27:00	TCSAU020_Q@34	7114	5613	6.98e-09	5.76e-09	33	-5	0.981884
	2014-07-23	14:31:00	TCSAU020_Q@35	7107	5446	7e-09	5.74e-09	35	-9	0.981726
	2014-07-23	15:12:00	TCSAU020_Q@45	7190	5496	6.42e-09	5.73e-09	38	-12	0.981994
	2014-07-23	15:16:00	TCSAU020_Q@46	6995	5450	6.55e-09	5.73e-09	34	-9	0.981373
	2014-07-23	15:20:00	TCSAU020_Q@47	7048	5344	6.61e-09	5.73e-09	34	-8	0.981355
	2014-07-24	01:09:00	TCBOA2_Q@71	6607	-1156	8.24e-09	5.64e-09	68	42	0.982787
	2014-07-24	01:13:00	TCBOA2_Q@72	6590	-1313	8.36e-09	5.63e-09	68	44	0.983203
	2014-07-24	01:17:00	TCBOA2_Q@73	6496	-1384	8.56e-09	5.62e-09	69	43	0.983061
	2014-07-24	01:21:00	TCBOA2_Q@74	6699	-1277	8.58e-09	5.61e-09	71	46	0.984076
	2014-07-24	02:23:00	TCBOA2_Q@89	6696	-1140	7.42e-09	5.65e-09	68	43	0.983157
	2014-07-24	02:27:00	TCBOA2_Q@90	6566	-1210	7.84e-09	5.64e-09	67	41	0.983333
	2014-07-24	02:32:00	TCBOA2_Q@91	6629	-1378	8.06e-09	5.63e-09	68	47	0.983907
	2014-07-24	02:36:00	TCBOA2_Q@92	6490	-1437	8.04e-09	5.62e-09	68	43	0.983183
	2014-07-24	02:40:00	TCBOA2_Q@93	6552	-1483	8.11e-09	5.61e-09	67	46	0.983372
	2014-07-24	10:16:00	TCCOL1_Q@16	-7784	-1220	7.38e-09	6.3e-09	-2	81	0.977832
	2014-07-24	10:20:00	TCCOL1_Q@17	-7777	-1364	7.12e-09	6.32e-09	-4	82	0.978018
	2014-07-24	10:24:00	TCCOL1_Q@18	-7701	-1293	7.08e-09	6.33e-09	1	80	0.977798
	2014-07-24	11:10:00	TCCOL1_Q@29	-7709	-1487	6.33e-09	6.17e-09	2	82	0.978848
	2014-07-24	11:14:00	TCCOL1_Q@30	-7690	-1607	6.18e-09	6.14e-09	-3	81	0.978899
	2014-07-24	11:18:00	TCCOL1_Q@31	-7817	-1718	6.16e-09	6.13e-09	-7	82	0.978998
	2014-07-25	03:21:00	CHR10_Q@102	6206	6502	6.68e-09	5.81e-09	14	5	0.982622
	2014-07-25	03:25:00	CHR10_Q@103	6174	6616	6.92e-09	5.91e-09	16	10	0.982333
	2014-07-25	03:30:00	CHR10_Q@104	6318	6564	7.08e-09	6.01e-09	15	8	0.983179
	2014-07-25	03:34:00	CHR10_Q@105	6344	6501	7.12e-09	6.08e-09	14	8	0.982895
	2014-07-25	03:38:00	CHR10_Q@106	6257	6648	7.02e-09	6.08e-09	13	10	0.982761
	2014-07-25	15:07:00	MOR61_Q@15	-531	9778	6.14e-09	5.8e-09	3	33	0.980574
	2014-07-25	15:11:00	MOR61_Q@16	-655	9742	6.03e-09	5.81e-09	3	32	0.980652
	2014-07-25	15:15:00	MOR61_Q@17	-579	9836	5.92e-09	5.8e-09	2	36	0.980668
	2014-07-25	15:36:00	MOR61_Q@22	-607	9680	5.7e-09	5.8e-09	5	37	0.980633
	2014-07-25	15:40:00	MOR61_Q@23	-494	9844	5.56e-09	5.8e-09	10	35	0.980331
	2014-07-25	15:44:00	MOR61_Q@24	-553	9885	5.49e-09	5.78e-09	2	40	0.980857
3	FITTED MODEL:
	ANOVA results and summary statistics of the additional quartz model
		DG	SS	MS	F	Coeff	VIF	p-value
	Source
	Model	7	0,000105	0,000015	77,86	_	_	0
	Linear	6	0,000061	0,000010	52,74	_	_	0
	Interaction	1	0,000017	0,000017	88,15	_	_	0
	Terms
	Constant					0,981161		0,000
	X	1	0,000009	0,000009	46,47	0,001753	10,01	0,000
	Y	1	0,000003	0,000003	14,43	-0,001003	7,53	0,001
	CP	1	0,000000	0,000000	0,09	-0,000111	7,13	0,763
	PI	1	0,000000	0,000000	0,92	-0,000240	4,68	0,346
	LT1defX	1	0,000001	0,000001	6,43	-0,000641	5,46	0,016
	LT1defY	1	0,000000	0,000000	2,35	-0,000300	3,37	0,135
	PI × LT1defY	1	0,000017	0,000017	88,15	-0,002258	1,58	0,000
	Error	33	0,000006	0,000000
	Total	40	0,000111
	Summary statistics		S	R2	Adj-R2	Pred-R2
			0.0004837	0.9429	0.9308	0.9159
4	RESULTS:								5	TOTAL UNCERTAINTY		(3) From 3. Quartz model
		Fitted		Standardized	Leverage	Cook	Predicted	Predicted		Predicted	Predicted	18O/16O	d18O	d18O	Total
	Label	IMFu	Residuals	Residual	Hi	Distance	IMFu	IMFu+1σ		IMF (3)	IMF 1σ (3)	SIMS	by IMF+1σ (3)	by IMFu+1σ	Uncertainty
	Pattern3_QUARS@1	0.980649	-0.0006688	-1.71991	0.214287	0.100845	0.980649	0.0002031		0.980893	0.0002031	0.001984	8.49192	9.16072	0.668799
	Pattern3_QUARS@2	0.980572	-0.0005003	-1.28801	0.215943	0.057114	0.980572	0.0002039		0.980817	0.0002039	0.0019841	8.62006	9.29167	0.671612
	Pattern3_QUARS@3	0.980902	-0.0002633	-0.73757	0.337977	0.034716	0.980902	0.000255		0.981147	0.0002551	0.0019853	8.83807	9.61488	0.776807
	Pattern3_QUARS@4	0.980448	-6.78e-05	-0.16468	0.119928	0.000462	0.980448	0.0001519		0.980693	0.000152	0.0019848	9.15685	9.72191	0.56506
	Pattern3_QUARS@5	0.98035	0.0013173	3.27534	0.159535	0.254542	0.98035	0.0001752		0.980594	0.0001753	0.0019874	10.5568	11.1697	0.612927
	Pattern3_QUARS@6	0.980369	0.0008088	2.00253	0.15239	0.090122	0.980369	0.0001713		0.980613	0.0001713	0.0019864	10.0329	10.6373	0.604455
	Pattern3_QUARS@7	0.980503	0.0001779	0.47193	0.261341	0.00985	0.980503	0.0002243		0.980748	0.0002243	0.0019854	9.33092	10.0451	0.714156
	Pattern3_QUARS@8	0.980608	0.0004186	1.11411	0.266518	0.056378	0.980608	0.0002265		0.980853	0.0002265	0.0019861	9.57646	10.2952	0.718786
	Pattern3_QUARS@9	0.980787	0.0001189	0.33342	0.339481	0.007142	0.980787	0.0002556		0.981032	0.0002557	0.0019858	9.20979	9.98821	0.77842
	TCSAU020_Q@33	0.981897	-0.0007251	-1.74816	0.105969	0.045279	0.981897	0.0001428		0.982142	0.0001428	0.0019864	8.48998	9.03503	0.54505
	TCSAU020_Q@34	0.981748	0.0001357	0.33087	0.126358	0.001979	0.981748	0.0001559		0.981993	0.000156	0.0019878	9.34029	9.91294	0.572643
	TCSAU020_Q@35	0.981552	0.0001748	0.43876	0.175494	0.005122	0.981552	0.0001838		0.981796	0.0001838	0.0019875	9.36185	9.9909	0.629046
	TCSAU020_Q@45	0.981433	0.000561	1.45124	0.22356	0.075801	0.981433	0.0002074		0.981677	0.0002075	0.001988	9.71377	10.3918	0.67803
	TCSAU020_Q@46	0.98152	-0.0001471	-0.37158	0.18562	0.003934	0.98152	0.000189		0.981765	0.0001891	0.0019868	9.03276	9.67345	0.640689
	TCSAU020_Q@47	0.98157	-0.0002147	-0.53922	0.175915	0.007758	0.98157	0.000184		0.981815	0.000184	0.0019867	8.93584	9.56605	0.630208
	TCBOA2_Q@71	0.983307	-0.0005206	-1.25768	0.109827	0.024394	0.983307	0.0001454		0.983553	0.0001454	0.0019896	8.66305	9.21377	0.550724
	TCBOA2_Q@72	0.983413	-0.0002107	-0.51412	0.12728	0.004819	0.983413	0.0001565		0.983659	0.0001566	0.0019905	8.99911	9.57284	0.573738
	TCBOA2_Q@73	0.983352	-0.0002913	-0.7309	0.174624	0.014128	0.983352	0.0001833		0.983597	0.0001834	0.0019902	8.88313	9.51083	0.627699
	TCBOA2_Q@74	0.983495	0.000581	1.46467	0.182302	0.059785	0.983495	0.0001873		0.98374	0.0001874	0.0019922	9.7461	10.3825	0.636362
	TCBOA2_Q@89	0.983405	-0.0002483	-0.6482	0.237464	0.016355	0.983405	0.0002138		0.98365	0.0002138	0.0019904	8.89899	9.58917	0.690187
	TCBOA2_Q@90	0.983312	2.08e-05	0.05019	0.109962	3.9e-05	0.983312	0.0001455		0.983557	0.0001455	0.0019907	9.21651	9.76671	0.550202
	TCBOA2_Q@91	0.983571	0.0003356	0.81518	0.119288	0.011251	0.983571	0.0001515		0.983817	0.0001516	0.0019919	9.55177	10.1155	0.563691
	TCBOA2_Q@92	0.983411	-0.0002278	-0.54913	0.105526	0.004447	0.983411	0.0001425		0.983656	0.0001425	0.0019904	8.96595	9.5098	0.543851
	TCBOA2_Q@93	0.983584	-0.0002126	-0.51493	0.114246	0.004275	0.983584	0.0001483		0.98383	0.0001483	0.0019908	8.98432	9.54101	0.556696
	TCCOL1_Q@16	0.978021	-0.0001888	-0.52352	0.324231	0.016437	0.978021	0.0002498		0.978265	0.0002499	0.0019796	8.90972	9.6771	0.767384
	TCCOL1_Q@17	0.977904	0.0001145	0.30665	0.27545	0.004469	0.977904	0.0002302		0.978148	0.0002303	0.00198	9.25447	9.98173	0.727257
	TCCOL1_Q@18	0.977881	-8.29e-05	-0.22276	0.280653	0.00242	0.977881	0.0002324		0.978124	0.0002325	0.0019795	9.02209	9.75271	0.730617
	TCCOL1_Q@29	0.97895	-0.0001024	-0.25747	0.178436	0.0018	0.97895	0.0001853		0.979194	0.0001854	0.0019817	9.08848	9.72223	0.633744
	TCCOL1_Q@30	0.979294	-0.000395	-1.00752	0.20149	0.032018	0.979294	0.0001969		0.979538	0.000197	0.0019818	8.77313	9.43036	0.657234
	TCCOL1_Q@31	0.979381	-0.0003829	-0.98107	0.208465	0.031687	0.979381	0.0002003		0.979625	0.0002004	0.001982	8.78185	9.44604	0.66419
	CHR10_Q@102	0.982076	0.000546	1.31316	0.101621	0.024382	0.982076	0.0001398		0.982321	0.0001399	0.0019893	9.78127	10.3209	0.539579
	CHR10_Q@103	0.982347	-1.38e-05	-0.03344	0.109703	1.7e-05	0.982347	0.0001453		0.982592	0.0001453	0.0019887	9.19279	9.74311	0.550318
	CHR10_Q@104	0.982682	0.000497	1.27689	0.212699	0.05506	0.982682	0.0002023		0.982927	0.0002024	0.0019904	9.65264	10.3203	0.667669
	CHR10_Q@105	0.982915	-1.98e-05	-0.05501	0.325349	0.000182	0.982915	0.0002502		0.98316	0.0002503	0.0019899	9.11068	9.87625	0.765563
	CHR10_Q@106	0.982851	-9.01e-05	-0.25012	0.325215	0.003769	0.982851	0.0002502		0.983096	0.0002502	0.0019896	9.02432	9.78976	0.765445
	MOR61_Q@15	0.980618	-4.33e-05	-0.11047	0.200022	0.000381	0.980618	0.0001962		0.980862	0.0001963	0.0019852	9.14077	9.79592	0.655145
	MOR61_Q@16	0.980584	6.82e-05	0.17112	0.175509	0.000779	0.980584	0.0001838		0.980828	0.0001838	0.0019853	9.23944	9.86903	0.629591
	MOR61_Q@17	0.980677	-8.7e-06	-0.02167	0.170719	1.2e-05	0.980677	0.0001813		0.980921	0.0001813	0.0019853	9.14635	9.77067	0.624325
	MOR61_Q@22	0.980684	-5.04e-05	-0.12603	0.168786	0.000403	0.980684	0.0001802		0.980928	0.0001803	0.0019853	9.14018	9.76233	0.622155
	MOR61_Q@23	0.98059	-0.0002586	-0.65813	0.197951	0.013362	0.98059	0.0001952		0.980834	0.0001952	0.0019847	8.91653	9.56939	0.652856
	MOR61_Q@24	0.980798	5.91e-05	0.15097	0.202865	0.000725	0.980798	0.0001976		0.981043	0.0001976	0.0019857	9.20741	9.86629	0.658877
															0.64419	average
															0.0713138	standard deviation

## Sheet: 7.Extra resources
	Extra resources about Response Surface Methodology and related statistical topics.
	Websites
	http://support.minitab.com/en-us/minitab/17/topic-library/modeling-statistics/doe/response-surface-designs/what-is-a-response-surface-design/
	http://blog.minitab.com/blog/quality-data-analysis-and-statistics/reducing-the-size-of-your-response-surface-design
	http://stats.stackexchange.com/
	https://onlinecourses.science.psu.edu/stat503/node/57
	http://www.itl.nist.gov/div898/handbook/pri/section3/pri336.htm
